# Supplementary material for: Synergistic interaction between lipid-loading and doxorubicin exposure in Huh7 hepatoma cells results in enhanced cytotoxicity and cellular oxidative stress: implications for acute and chronic care of obese cancer patients
Source: Royal Society of Chemistry journal article supplement (doi:10.1039/c5tx00173k), 2015-01-01
Supplement: c5tx00173k1.xlsx [file c5tx00173k1.xlsx]

## Sheet: Info
Differentially expressed genes in naïve and steatotic Huh7 cells exposed to Dox
Data:	Array Express Accession number E-MTAB-3523
Method:	Huh7 cells (naïve or pre-loaded with 300µM FFA mixture for 24 hours) were exposed to doxorubicin for 4 or 12 hours
	RNA samples were sent to the Central Biotechnology Services (Cardiff University, UK), for quality control, synthesis of biotin-labeled cRNA, and hybridisation against Illumina Human-HT12
	Differential gene expression analysis was undertaken using the limma package
ArrayExpress:	Raw data is deposited at https://www.ebi.ac.uk/arrayexpress/ under accession number E-MTAB-3523
Tab 1: Differentially Expressed Genes
Entrez ID	Entrez ID
Gene Symbol	Entrez Gene Symbol
log fold change	log fold change between tumour and matched-normal sample
Adjusted p-value	Output p-value following Bonferroni adjustment for multiple comparison
	Where two probes for the same Gene ID were detected as differentially expressed, both values are presented

## Sheet: 4hs - LOW
C vs. FFA 4hrs					C vs. 0.1 DOX 4hrs					C vs. FFA+0.1DOX 4hrs
Entrez ID	Gene Symbol	log fold	Adj.P value		Entrez ID	Gene Symbol	log fold	Adj.P value		Entrez ID	Gene Symbol	log fold	Adj.P value
4501	MT1X	3.81921	4.51903e-06		None					None
4493	MT1E	3.46348	7.44294e-06
4489	MT1A	2.67811	0.000239347
4495	MT1G	2.36305	0.00921873
1543	CYP1A1	2.36111	0.000247141
9518	GDF15	2.29217	0.000877443
4502	MT2A	2.23874	0.000809167
NA	MT1JP	2.21672	0.000268185
55500	ETNK1	2.03162	4.90756e-08
6430	SRSF5	1.92804	4.16879e-07
6430	SRSF5	1.89056	1.3308e-07
100132406	NBPF1	1.86534	0.00120771
2861	GPR37	1.79254	1.42695e-07
NA	AK055561	1.78397	2.0178e-08
22822	PHLDA1	1.68716	0.0010389
8334	HIST1H2AC	1.67076	4.34405e-05
7779	SLC30A1	1.65752	1.42254e-05
5629	PROX1	1.62935	0.00072155
4609	MYC	1.60869	0.000982477
1958	EGR1	1.60302	2.20998e-05
1848	DUSP6	1.52928	0.000131785
2353	FOS	1.51982	1.11768e-06
1316	KLF6	1.48743	0.00152683
55281	TMEM140	1.48309	7.48427e-07
338758	LOC338758	1.47864	0.000606261
7779	SLC30A1	1.46694	5.02673e-05
375061	FAM89A	1.45847	4.52411e-05
1906	EDN1	1.41702	0.000401263
57132	CHMP1B	1.40395	7.22397e-07
10137	CPNE1	1.40281	6.26071e-06
55500	ETNK1	1.39455	5.84025e-05
55603	FAM46A	1.38422	4.44573e-05
NA	TLE4	1.37594	8.68909e-08
1316	KLF6	1.37445	0.00611782
85441	PRIC285	1.36827	6.57283e-07
2920	CXCL2	1.36585	1.55903e-05
375061	FAM89A	1.33513	2.83203e-05
3017	HIST1H2BD	1.33258	0.000412205
85236	HIST1H2BK	1.32634	0.000185566
4609	MYC	1.32142	0.000555683
55294	FBXW7	1.31068	0.000188386
51619	UBE2D4	1.30826	0.000563891
7357	UGCG	1.29826	0.00108805
678	ZFP36L2	1.29745	0.00253121
8848	TSC22D1	1.29696	0.00109925
344838	PAQR9	1.29676	0.00154365
8835	SOCS2	1.29132	0.000401528
6431	SRSF6	1.28435	0.00152683
64332	NFKBIZ	1.28353	0.0077741
8365	HIST1H4H	1.28171	0.0013016
998	CDC42	1.27357	0.0093849
1848	DUSP6	1.25677	0.00409447
493812	HCG11	1.2459	5.20371e-06
2296	FOXC1	1.23158	0.00526277
55339	WDR33	1.22828	1.55215e-05
7057	THBS1	1.21319	0.00535377
375061	FAM89A	1.20357	0.000161345
51092	SIDT2	1.19712	0.00269507
10608	MXD4	1.19271	0.000336545
9232	PTTG1	1.19263	9.52495e-06
1525	CXADR	1.1899	2.77474e-06
90231	KIAA2013	1.1891	4.04467e-07
8424	BBOX1	1.1873	7.61837e-07
NA	HIST2H2AA4	1.18106	0.00528144
83641	FAM107B	1.17106	0.000125454
90427	BMF	1.1696	0.000103504
8445	DYRK2	1.16795	0.000293457
25945	PVRL3	1.16557	0.00528538
3017	HIST1H2BD	1.16321	0.000485194
4942	OAT	1.1584	0.00176161
2150	F2RL1	1.1433	6.07768e-05
151613	TTC14	1.13943	0.00034283
1843	DUSP1	1.13681	0.00140905
221833	SP8	1.13603	0.00288339
7259	DSE	1.13514	1.85402e-06
151613	TTC14	1.12097	0.000167199
726	CAPN5	1.11489	0.000443805
152007	GLIPR2	1.11139	0.0021771
8971	H1FX	1.11007	0.000188723
440	ASNS	1.10233	8.61371e-05
10672	GNA13	1.10021	0.00192953
10161	LPAR6	1.09912	1.0386e-05
2872	MKNK2	1.09864	0.000605936
79862	ZNF669	1.08354	0.00187988
8970	HIST1H2BJ	1.08331	7.58695e-05
94241	TP53INP1	1.08208	6.78719e-05
54805	CNNM2	1.06867	1.83005e-07
4048	LTA4H	1.06742	4.16007e-05
5147	PDE6D	1.0639	1.44438e-05
26255	PTTG3	1.05724	8.74268e-05
195827	C9orf21	1.0518	0.00336793
10468	FST	1.04783	0.00286797
23568	ARL2BP	1.04691	9.52495e-06
NA	GTF2IP1	1.03684	0.0104283
7855	FZD5	1.03564	0.00139751
84918	LRP11	1.03202	0.000510394
10924	SMPDL3A	1.02762	0.00610848
84265	POLR3GL	1.02697	5.29751e-06
51111	SUV420H1	1.02334	1.83005e-07
51669	TMEM66	1.02255	1.97167e-05
3484	IGFBP1	1.01921	0.000125183
23204	ARL6IP1	1.01805	0.000835373
56255	TMX4	1.01651	0.00782984
8555	CDC14B	1.01641	2.13579e-07
23645	PPP1R15A	1.01361	0.000274368
90427	BMF	1.00773	8.00758e-05
9846	GAB2	0.998531	1.64481e-05
10955	SERINC3	0.998034	0.000818787
9877	ZC3H11A	0.990095	0.00114515
3093	UBE2K	0.987054	0.000983814
10236	HNRNPR	0.987051	0.000555683
7328	UBE2H	0.984706	2.88071e-05
23095	KIF1B	0.983208	0.00830721
80204	FBXO11	0.982767	0.00100708
115123	March3	0.981548	0.000157681
51111	SUV420H1	0.974439	0.00176889
124491	TMEM170A	0.97385	4.16007e-05
112936	VPS26B	0.972836	5.64683e-05
57570	TRMT5	0.971804	4.63019e-06
23457	ABCB9	0.96885	0.000121849
221079	ARL5B	0.963555	1.03715e-07
130814	PQLC3	0.962063	0.00121925
2932	GSK3B	0.955376	0.00102307
59343	SENP2	0.955149	4.52411e-05
26234	FBXL5	0.952245	0.0012021
359948	IRF2BP2	0.94841	0.000390253
NA	CPNE1	0.94667	0.00175367
1027	CDKN1B	0.942906	0.00183544
400027	LOC400027	0.9413	4.67291e-07
3099	HK2	0.940331	0.00093334
59343	SENP2	0.940192	0.00058493
858	CAV2	0.934393	0.0024544
7088	TLE1	0.933703	0.00751745
8473	OGT	0.931125	3.03989e-05
10252	SPRY1	0.927443	0.00535377
7546	ZIC2	0.925603	0.00518579
645676	LOC645676	0.921222	3.48862e-07
NA	LOC100129186	0.91984	0.000401961
6654	SOS1	0.916868	1.0386e-05
2885	GRB2	0.915732	0.000590876
10505	SEMA4F	0.915719	0.00298013
9232	PTTG1	0.9133	0.000500455
64121	RRAGC	0.91255	8.00114e-06
3151	HMGN2	0.908222	4.10906e-05
30061	SLC40A1	0.90579	0.000861299
94241	TP53INP1	0.904982	0.00229736
857	CAV1	0.900146	1.08825e-05
80255	SLC35F5	0.899183	0.00266252
8848	TSC22D1	0.892798	0.00974994
7025	NR2F1	0.891343	0.00278281
3151	HMGN2	0.891129	8.42653e-05
201164	PLD6	0.88916	0.00627892
138151	NACC2	0.888221	5.75877e-06
29094	HSPC159	0.878512	0.00179559
27324	TOX3	0.877972	0.00258621
4929	NR4A2	0.877302	9.52495e-06
58528	RRAGD	0.870911	9.13338e-06
8935	SKAP2	0.867708	0.00563729
665	BNIP3L	0.862813	0.0034732
26061	HACL1	0.860346	1.72052e-05
23582	CCNDBP1	0.858935	4.44573e-05
151195	CCNYL1	0.858573	0.00502151
10611	PDLIM5	0.85252	9.35851e-05
122786	FRMD6	0.851091	0.00531318
8545	CGGBP1	0.850403	1.228e-05
1647	GADD45A	0.849991	0.000948851
1979	EIF4EBP2	0.848866	0.0016907
166815	TIGD2	0.846848	0.00275443
9371	KIF3B	0.844244	0.000819452
84962	JUB	0.842825	0.000311016
90231	KIAA2013	0.842572	0.000113684
79469	BCMSUNL	0.842455	0.00151532
7108	TM7SF2	0.842453	0.00135769
135114	HINT3	0.839264	0.000382087
8895	CPNE3	0.836687	0.000270011
26190	FBXW2	0.83612	1.66292e-05
NA	APITD1	0.826452	2.77474e-06
7072	TIA1	0.822098	0.000268185
64756	ATPAF1	0.821267	0.000580521
8760	CDS2	0.820498	0.000109227
65018	PINK1	0.817888	0.0101003
115123	March3	0.816468	0.00209671
9969	MED13	0.816063	4.90756e-08
25852	ARMC8	0.812549	7.83479e-05
84647	PLA2G12B	0.812218	0.00095363
NA	LOC283788	0.811803	0.00225229
10137	CPNE1	0.809558	0.00149643
8654	PDE5A	0.808882	5.00806e-06
151195	CCNYL1	0.80857	0.00479759
5527	PPP2R5C	0.806863	0.00668475
23192	ATG4B	0.806715	0.00147572
4790	NFKB1	0.806083	0.00465753
5728	PTEN	0.80247	0.000914888
7328	UBE2H	0.799211	0.000843103
5594	MAPK1	0.792999	0.00173298
10124	ARL4A	0.791974	0.00780992
22920	KIFAP3	0.790862	0.00174176
9419	CRIPT	0.790116	5.00806e-06
9182	RASSF9	0.788558	0.0016603
84858	ZNF503	0.78624	3.0878e-06
348262	FAM195B	0.786072	0.00712024
23464	GCAT	0.785163	6.02483e-05
133	ADM	0.784689	0.000865083
291	SLC25A4	0.784002	0.000207543
64327	LMBR1	0.78256	0.00136882
80139	ZNF703	0.780383	0.00157477
6609	SMPD1	0.779852	0.0074663
113263	GLCCI1	0.77919	0.00228487
2768	GNA12	0.774257	0.000155954
84058	WDR54	0.774178	0.00301551
83861	RSPH3	0.773246	3.48862e-07
6651	SON	0.772375	0.0011187
664	BNIP3	0.768089	0.000103504
901	CCNG2	0.767658	0.00081411
200845	KCTD6	0.767388	0.00135031
3964	LGALS8	0.7655	0.00542104
9117	SEC22C	0.764707	0.00170514
25	ABL1	0.762317	2.19129e-09
51128	SAR1B	0.761363	0.000589319
NA	BC038747	0.760086	6.46345e-06
79960	PHF17	0.758606	0.00284911
10492	SYNCRIP	0.75349	0.00366053
10381	TUBB3	0.75091	0.00409243
51228	GLTP	0.750375	0.000167199
57404	CYP20A1	0.749141	0.0017313
3925	STMN1	0.747521	1.72052e-05
9249	DHRS3	0.746487	2.42055e-05
196	AHR	0.746046	5.20876e-05
51535	PPHLN1	0.745556	0.000554667
140460	ASB7	0.745422	4.89495e-07
55069	C7orf42	0.744573	4.42711e-05
125488	TTC39C	0.740012	0.00295542
8445	DYRK2	0.739758	0.00424331
114876	OSBPL1A	0.739699	0.00233198
10927	SPIN1	0.739409	0.00425919
9749	PHACTR2	0.738214	0.00171294
8843	GPR109B	0.737371	0.00176051
3516	RBPJ	0.735301	0.00852048
9117	SEC22C	0.734586	5.29751e-06
2729	GCLC	0.734504	0.00122497
5605	MAP2K2	0.734263	0.00541873
10611	PDLIM5	0.732663	0.000730066
84196	USP48	0.732534	0.00975886
79070	KDELC1	0.732015	0.00019375
7263	TST	0.729491	0.00157865
8660	IRS2	0.729184	0.000367906
8767	RIPK2	0.729029	0.00733586
5937	RBMS1	0.725047	0.00608856
159013	CXorf38	0.72487	0.000109051
27242	TNFRSF21	0.724263	0.00612339
994	CDC25B	0.723373	0.00940479
11067	C10orf10	0.72323	0.00865489
339122	RAB43	0.72288	3.14711e-06
3839	KPNA3	0.722797	0.00847518
10468	FST	0.722135	0.00788127
NA	UBE2V1	0.721865	0.000976928
10670	RRAGA	0.721724	0.000958842
26262	TSPAN17	0.721105	0.00216451
79134	TMEM185B	0.720377	0.00637607
114926	C8orf40	0.719115	0.000403723
143686	SESN3	0.718471	0.000103091
10313	RTN3	0.71823	0.000809167
8555	CDC14B	0.716742	5.84025e-05
NA	ZBTB7B	0.715858	1.86632e-05
440270	GOLGA8B	0.715833	0.00277695
23457	ABCB9	0.715083	0.000136961
9371	KIF3B	0.715058	0.00061971
4097	MAFG	0.708957	0.000938118
79786	KLHL36	0.708326	2.5828e-05
55349	CHDH	0.706417	1.47561e-05
79647	AKIRIN1	0.702393	0.00547057
63917	GALNT11	0.699007	0.0104246
64764	CREB3L2	0.698014	0.00356929
22936	ELL2	0.697559	0.00553558
84279	PRADC1	0.696343	0.00394261
NA	CHN2	0.696233	0.00677862
4329	ALDH6A1	0.694636	0.00940479
118433	RPL23AP7	0.694298	0.00308563
5900	RALGDS	0.693805	0.0012264
NA	C13orf18	0.691693	1.20094e-05
7323	UBE2D3	0.688872	0.00678249
11072	DUSP14	0.688359	0.00028659
84309	NUDT16L1	0.688065	0.00242304
51321	AMZ2	0.687221	0.00117232
NA	RAB43	0.68711	5.20876e-05
1647	GADD45A	0.68667	0.00426167
65258	MPPE1	0.68641	0.000204346
55532	SLC30A10	0.684888	0.00830721
440	ASNS	0.6844	0.00735521
128387	TATDN3	0.68428	0.000239729
404672	GTF2H5	0.683581	2.17195e-05
55339	WDR33	0.682218	0.00251475
728855	LOC728855	0.682107	0.00716138
6651	SON	0.682086	0.000228192
10966	RAB40B	0.678315	1.30736e-05
6738	TROVE2	0.676731	0.00102186
5412	UBL3	0.67666	0.000546331
5165	PDK3	0.676509	0.00409317
114299	AKAP2	0.674912	0.000272264
219771	CCNY	0.674678	0.000810145
5533	PPP3CC	0.673379	0.00224212
51626	DYNC2LI1	0.673356	0.00450158
7681	MKRN3	0.672432	4.10906e-05
113622	ADPRHL1	0.670621	0.0038477
84277	DNAJC30	0.670077	2.41696e-05
150465	TTL	0.669482	0.000984516
22858	ICK	0.668065	0.00271949
261726	TIPRL	0.667099	0.00771006
79022	TMEM106C	0.666998	0.00528144
115123	March3	0.662721	0.00359894
1912	PHC2	0.65827	0.00578972
100272147	MTCP1NB	0.657184	0.000496518
2743	GLRB	0.656843	6.18462e-05
3181	HNRNPA2B1	0.654803	0.000442358
10672	GNA13	0.65479	0.00518579
10238	WDR68	0.654384	0.00266252
222389	BEND7	0.652695	0.00271603
221079	ARL5B	0.651652	0.000277087
60343	FAM3A	0.6501	0.000673136
55251	PCMTD2	0.647602	0.00171294
90141	EFCAB11	0.644332	0.00401962
51103	NDUFAF1	0.644034	0.00181661
6229	RPS24	-0.64579	0.000453003
6723	SRM	-0.646555	0.000670167
2582	GALE	-0.64666	0.00547057
27077	B9D1	-0.649048	0.00209671
3182	HNRNPAB	-0.649457	6.07768e-05
27077	B9D1	-0.649731	0.000899907
4793	NFKBIB	-0.649989	0.00157573
79017	GGCT	-0.650106	8.08798e-05
79763	ISOC2	-0.652671	0.000340057
100288413	LOC100288413	-0.653167	0.000209927
8894	EIF2S2	-0.653565	0.00277935
8914	TIMELESS	-0.655002	0.000273758
51557	LGSN	-0.655218	0.000274368
126969	SLC44A3	-0.656513	0.00187351
1595	CYP51A1	-0.657114	0.00302572
6616	SNAP25	-0.659891	6.11176e-06
51668	HSPB11	-0.660221	0.00328404
27243	CHMP2A	-0.661808	0.0102158
55825	PECR	-0.662466	0.00185807
55540	IL17RB	-0.66259	0.0079802
9361	LONP1	-0.664944	0.0037973
2786	GNG4	-0.665496	0.00610661
NA	AY358864	-0.666149	0.00191715
9416	DDX23	-0.668836	0.000139893
10280	SIGMAR1	-0.672396	0.000206669
57647	DHX37	-0.673503	0.00262116
4015	LOX	-0.674163	0.00109422
50865	HEBP1	-0.674799	0.000220131
9277	WDR46	-0.677229	0.000311016
6476	SI	-0.678082	0.00182699
2690	GHR	-0.6782	0.00335453
999	CDH1	-0.68045	0.00730181
10280	SIGMAR1	-0.680792	0.000147424
10327	AKR1A1	-0.683228	0.00104874
6652	SORD	-0.684108	0.00367817
51065	RPS27L	-0.688362	1.54199e-05
7936	RDBP	-0.691187	0.00100675
2202	EFEMP1	-0.693284	0.0104246
3070	HELLS	-0.693887	0.000426426
65003	MRPL11	-0.695388	0.00196648
275	AMT	-0.695972	0.000778882
55748	CNDP2	-0.696656	2.20628e-05
84964	ALKBH6	-0.69829	0.00490259
79075	DSCC1	-0.698392	0.000899846
2787	GNG5	-0.69847	0.00351179
5976	UPF1	-0.698532	0.000680958
3300	DNAJB2	-0.700307	0.000103592
85012	TCEAL3	-0.700894	0.00283129
7423	VEGFB	-0.701523	0.0024251
23452	ANGPTL2	-0.701657	3.98699e-05
5595	MAPK3	-0.702482	0.00511227
3315	HSPB1	-0.702613	0.00602035
2653	GCSH	-0.705248	0.00109422
79019	CENPM	-0.708835	0.00216872
10280	SIGMAR1	-0.710804	0.000235688
3306	HSPA2	-0.710948	0.00419652
5902	RANBP1	-0.712051	7.05741e-05
55859	BEX1	-0.712278	0.000563891
1910	EDNRB	-0.71255	0.00134208
3306	HSPA2	-0.714366	0.00394261
30000	TNPO2	-0.716949	0.00345414
NA	BX110351	-0.719842	0.000182536
1891	ECH1	-0.720549	0.000139893
374868	ATP9B	-0.721905	2.77474e-06
7169	TPM2	-0.72404	0.00505761
3192	HNRNPU	-0.725038	4.18981e-05
5198	PFAS	-0.725798	0.00214236
11284	PNKP	-0.727119	0.000150436
2264	FGFR4	-0.728678	0.00115228
1644	DDC	-0.730263	0.000958842
23223	RRP12	-0.730815	0.00187351
4927	NUP88	-0.731227	0.00173841
NA	MIFR-1	-0.734552	0.000299309
55621	TRMT1	-0.73484	2.77474e-06
11343	MGLL	-0.7365	0.00211403
2202	EFEMP1	-0.736678	0.0104195
11186	RASSF1	-0.73673	0.00366053
56906	THAP10	-0.738002	6.07768e-05
26472	PPP1R14B	-0.741662	0.000778882
1468	SLC25A10	-0.741722	0.000149652
221061	FAM171A1	-0.741833	0.00212988
166	AES	-0.742867	0.0018743
28969	BZW2	-0.744763	1.74583e-05
8558	CDK10	-0.747744	0.000859923
10452	TOMM40	-0.748166	0.000687614
64855	FAM129B	-0.748356	0.000281641
55240	STEAP3	-0.748625	3.48862e-07
57109	REXO4	-0.748761	0.00247106
28976	ACAD9	-0.748813	8.34287e-05
7106	TSPAN4	-0.749187	0.00597394
93664	CADPS2	-0.752496	0.000192115
5832	ALDH18A1	-0.754637	3.76616e-05
130013	ACMSD	-0.754656	0.00122898
10606	PAICS	-0.755478	2.77474e-06
307	ANXA4	-0.755795	0.0094131
2027	ENO3	-0.760976	1.44438e-05
55755	CDK5RAP2	-0.762284	0.000447896
924	CD7	-0.765214	0.00242418
26472	PPP1R14B	-0.766007	0.00192597
7866	IFRD2	-0.767362	0.000133208
10947	AP3M2	-0.768723	2.0871e-07
220832	FABP5L3	-0.772328	0.00280672
55210	ATAD3A	-0.77276	0.000737781
2288	FKBP4	-0.778217	2.5943e-07
79783	C7orf10	-0.77854	1.44438e-05
6507	SLC1A3	-0.78269	0.00157727
54985	HCFC1R1	-0.785144	0.00541873
27122	DKK3	-0.785292	0.0077741
3856	KRT8	-0.78826	0.000187818
NA	RANBP1	-0.790331	3.42738e-05
50848	F11R	-0.792648	0.00295319
348093	RBPMS2	-0.7951	0.00787466
81888	HYI	-0.796027	0.00224359
908	CCT6A	-0.796649	1.15913e-05
5507	PPP1R3C	-0.800729	0.00158471
9497	SLC4A7	-0.803198	0.00267348
1163	CKS1B	-0.804839	1.64481e-05
4832	NME3	-0.807315	0.00157048
2242	FES	-0.807737	0.000100313
10606	PAICS	-0.809213	2.53123e-07
5595	MAPK3	-0.810205	0.00211159
55215	FANCI	-0.811557	5.07965e-06
83877	TM2D2	-0.812013	2.77474e-06
7205	TRIP6	-0.812178	0.0101489
11000	SLC27A3	-0.814519	0.000136961
10797	MTHFD2	-0.814832	2.87348e-06
4050	LTB	-0.816113	0.000730066
3990	LIPC	-0.816577	4.30847e-05
2634	GBP2	-0.817758	9.91575e-06
84899	TMTC4	-0.81784	1.98535e-05
1854	DUT	-0.82161	2.64666e-05
216	ALDH1A1	-0.822038	0.00432186
79071	ELOVL6	-0.823076	8.45351e-08
51537	MTFP1	-0.823091	0.0104072
2618	GART	-0.823104	0.000626924
64847	SPATA20	-0.823648	0.00125193
9718	ECE2	-0.827018	0.00019375
27018	NGFRAP1	-0.827973	2.02645e-05
440585	FAM183A	-0.828297	0.000298508
445	ASS1	-0.828767	0.00154365
29925	GMPPB	-0.832654	0.000984516
55723	ASF1B	-0.833997	6.52034e-05
113655	MFSD3	-0.834718	0.000498453
56893	UBQLN4	-0.836835	0.000425852
5213	PFKM	-0.839327	0.000891137
5335	PLCG1	-0.839668	0.00658069
84300	C6orf125	-0.83976	0.00392192
1503	CTPS	-0.841109	0.000254151
11182	SLC2A6	-0.841573	0.00233198
9415	FADS2	-0.844749	0.000322227
5909	RAP1GAP	-0.846767	2.87096e-05
1290	COL5A2	-0.848027	0.000723754
23306	TMEM194A	-0.850019	1.5602e-06
22948	CCT5	-0.851159	9.58022e-06
1627	DBN1	-0.851846	0.00262116
4552	MTRR	-0.852729	7.75651e-06
3294	HSD17B2	-0.85886	0.00730839
54498	SMOX	-0.863661	0.00629018
9406	ZRANB2	-0.865055	0.00405881
55920	RCC2	-0.86614	1.70015e-05
7867	MAPKAPK3	-0.867039	4.52411e-05
4173	MCM4	-0.86709	0.00736878
3315	HSPB1	-0.867208	0.00211403
2592	GALT	-0.868127	0.00387204
7351	UCP2	-0.869046	0.00123605
5649	RELN	-0.870392	5.07965e-06
57706	DENND1A	-0.874279	0.000155855
6604	SMARCD3	-0.87777	0.000345533
31	ACACA	-0.882305	0.00121815
5648	MASP1	-0.882447	0.00652915
10205	MPZL2	-0.882704	0.000702733
6732	SRPK1	-0.883394	2.57292e-05
10726	NUDC	-0.884337	0.00121815
10449	ACAA2	-0.885099	8.28379e-06
130576	LYPD6B	-0.885978	8.69514e-06
NA	RPL36A	-0.886781	0.000995761
284111	SLC13A5	-0.887121	0.00164203
13	AADAC	-0.888868	0.00339063
3373	HYAL1	-0.89357	0.000201236
55245	UQCC	-0.89577	8.45351e-08
4597	MVD	-0.899523	0.00023208
56301	SLC7A10	-0.899994	2.53123e-07
57418	WDR18	-0.903412	4.3602e-05
119559	SFXN4	-0.904352	2.77474e-06
4922	NTS	-0.904954	0.00788778
10049	DNAJB6	-0.907037	8.2374e-05
8463	TEAD2	-0.90912	8.40078e-05
29925	GMPPB	-0.909761	0.000246922
25902	MTHFD1L	-0.910721	1.98388e-06
30833	NT5C	-0.910759	0.00087628
7264	TSTA3	-0.911185	0.000672427
8842	PROM1	-0.921145	0.000155855
50814	NSDHL	-0.923317	0.000443805
79814	AGMAT	-0.926681	0.00188425
54498	SMOX	-0.928794	0.000553355
2810	SFN	-0.932134	2.62007e-05
2560	GABRB1	-0.933049	0.000576183
1786	DNMT1	-0.934189	0.00142674
54961	SSH3	-0.934316	0.000851328
5422	POLA1	-0.935458	0.00171294
7301	TYRO3	-0.935822	0.00230842
55920	RCC2	-0.938746	1.08825e-05
5245	PHB	-0.939217	6.57283e-07
196483	FAM86A	-0.939754	2.0178e-08
7169	TPM2	-0.940607	1.02326e-05
27131	SNX5	-0.940847	0.00028427
2892	GRIA3	-0.943154	0.000671687
100133941	DQ893812	-0.94384	0.00291468
79228	THOC6	-0.944482	1.69792e-07
5328	PLAU	-0.944858	0.000896289
84059	GPR98	-0.950766	0.000553355
11322	TMC6	-0.957956	0.000711328
118881	COMTD1	-0.963771	1.93967e-06
54997	TESC	-0.963985	1.19997e-05
NA	BOLA2B	-0.964231	0.0080407
4678	NASP	-0.965337	3.93963e-06
79077	DCTPP1	-0.971941	0.00306938
10162	LPCAT3	-0.979914	0.000167199
114571	SLC22A9	-0.987257	0.000390826
79019	CENPM	-0.989957	5.42543e-05
NA	ACY1	-0.995118	0.000451959
83959	SLC4A11	-0.996885	0.00454414
31	ACACA	-0.997735	0.000159371
9045	RPL14	-0.998676	0.000546331
4640	MYO1A	-1.00122	0.000119311
4174	MCM5	-1.00835	0.00712886
4837	NNMT	-1.0095	0.00184872
4595	MUTYH	-1.00959	0.000158737
5174	PDZK1	-1.01393	0.00195514
4860	PNP	-1.02539	1.05506e-06
1890	TYMP	-1.02943	0.000443805
26019	UPF2	-1.0395	2.74898e-06
3276	PRMT1	-1.04091	2.41696e-05
316	AOX1	-1.04351	0.000697594
4815	NINJ2	-1.04403	2.56495e-05
3880	KRT19	-1.04472	0.00229254
11186	RASSF1	-1.0462	0.00171216
2892	GRIA3	-1.0467	0.000698433
26873	OPLAH	-1.05207	7.253e-05
586	BCAT1	-1.05622	9.87671e-05
255738	PCSK9	-1.06046	2.80082e-05
402	ARL2	-1.06103	0.00724645
4176	MCM7	-1.06196	0.00775285
3856	KRT8	-1.06313	4.77422e-05
84706	GPT2	-1.06315	9.90439e-07
51557	LGSN	-1.06583	1.97167e-05
3856	KRT8	-1.066	1.16637e-06
3276	PRMT1	-1.08258	2.04389e-06
130576	LYPD6B	-1.08843	3.49186e-06
2542	SLC37A4	-1.10744	0.000328618
595	CCND1	-1.11018	0.000313592
4171	MCM2	-1.11132	0.00483822
7104	TM4SF4	-1.11656	2.77474e-06
10808	HSPH1	-1.11896	1.54199e-05
5646	PRSS3	-1.12054	0.00017821
3936	LCP1	-1.12527	0.000113051
84171	LOXL4	-1.12652	0.00460856
79711	IPO4	-1.12804	4.77422e-05
10946	SF3A3	-1.13269	0.000181109
55859	BEX1	-1.13421	0.00575191
3875	KRT18	-1.13729	0.00109422
2628	GATM	-1.13835	0.00322237
2984	GUCY2C	-1.14487	0.000472188
7106	TSPAN4	-1.15232	0.000141089
5831	PYCR1	-1.15312	2.04389e-06
706	TSPO	-1.15354	0.000899846
4830	NME1	-1.15411	3.24135e-06
3309	HSPA5	-1.15577	1.08303e-05
2762	GMDS	-1.15607	1.29564e-05
220001	VWCE	-1.15882	0.00847362
1361	CPB2	-1.16004	7.65668e-05
4172	MCM3	-1.16829	0.00257817
552900	BOLA2	-1.17583	0.00401689
2584	GALK1	-1.18083	0.00108519
5050	PAFAH1B3	-1.18293	0.00171294
2224	FDPS	-1.18531	6.35593e-05
432	ASGR1	-1.18628	0.00534601
23231	SEL1L3	-1.18794	6.78719e-05
56915	EXOSC5	-1.19719	3.48862e-07
2194	FASN	-1.19992	0.00125337
5699	PSMB10	-1.20002	5.12802e-05
3990	LIPC	-1.20008	6.01985e-07
3958	LGALS3	-1.20404	0.000607056
54938	SARS2	-1.20822	3.48862e-07
10763	NES	-1.20965	0.000136379
306	ANXA3	-1.22208	0.0104785
1361	CPB2	-1.22396	0.000113684
114571	SLC22A9	-1.23278	1.44438e-05
10590	SCGN	-1.23772	0.000496518
3026	HABP2	-1.25135	0.000180145
6159	RPL29	-1.25268	6.92051e-05
94274	PPP1R14A	-1.26614	0.000737781
284085	FLJ40504	-1.2701	0.00114259
4175	MCM6	-1.27149	0.00805513
283375	SLC39A5	-1.27152	8.08798e-05
7032	TFF2	-1.27223	0.00047065
445	ASS1	-1.29485	0.000168103
3312	HSPA8	-1.29848	0.00557408
64073	C19orf33	-1.29882	0.00477569
282969	C10orf125	-1.29955	1.11252e-05
7052	TGM2	-1.30532	2.7385e-07
1479	CSTF3	-1.30895	0.000152546
6159	RPL29	-1.31744	4.30094e-05
7103	TSPAN8	-1.31801	1.64481e-05
3898	LAD1	-1.32113	5.11118e-05
4172	MCM3	-1.3318	0.000261275
23649	POLA2	-1.33252	0.00178525
8195	MKKS	-1.33272	8.29234e-05
NA	GRIA3	-1.3424	3.30983e-05
8318	CDC45	-1.35873	0.00182347
634	CEACAM1	-1.36024	7.50945e-05
116843	C6orf192	-1.36521	0.000246922
7429	VIL1	-1.3819	6.19935e-07
6201	RPS7	-1.43192	1.85402e-06
4128	MAOA	-1.47667	5.95568e-07
3304	HSPA1A	-1.51334	0.000743643
441282	AKR1B15	-1.54608	5.50998e-07
6201	RPS7	-1.56585	2.09928e-07
2877	GPX2	-1.57972	0.0016016
63924	CIDEC	-1.58845	0.000684764
634	CEACAM1	-1.63203	9.42376e-07
3303	HSPA1A	-1.66584	9.52495e-06
51316	PLAC8	-1.73691	8.47698e-07
3158	HMGCS2	-1.75158	0.00518579
7407	VARS	-1.75461	6.15484e-07
10551	AGR2	-1.75536	1.13871e-05
51316	PLAC8	-1.76231	8.45351e-08
762	CA4	-1.79821	4.24422e-05
57016	AKR1B10	-2.53261	2.2769e-07
57817	HAMP	-2.53942	0.00543479

## Sheet: 4hs - HIGH
C vs. FFA 4hrs					C vs. 3.6 DOX 4hrs					C vs. 3.6 DOX +FFA 4hrs
Entrez ID	Gene Symbol	log fold	Adj.P value		Entrez ID	Gene Symbol	log fold	Adj.P value		Entrez ID	Gene Symbol	log fold	Adj.P value
4501	MT1X	3.81921	4.51903e-06		4501	MT1X	4.21581	4.35269e-07		None
4493	MT1E	3.46348	7.44294e-06		4493	MT1E	3.98125	4.11826e-07
4489	MT1A	2.67811	0.000239347		4489	MT1A	3.27428	9.00864e-06
4495	MT1G	2.36305	0.00921873		4495	MT1G	3.22586	0.00025009
1543	CYP1A1	2.36111	0.000247141		4502	MT2A	2.84264	2.24429e-05
9518	GDF15	2.29217	0.000877443		NA	MT1JP	2.35988	6.24363e-05
4502	MT2A	2.23874	0.000809167		1543	CYP1A1	2.33687	0.000142794
NA	MT1JP	2.21672	0.000268185		9518	GDF15	2.31138	0.000415893
55500	ETNK1	2.03162	4.90756e-08		4494	MT1F	2.22326	0.000647332
6430	SRSF5	1.92804	4.16879e-07		55500	ETNK1	2.03712	1.33031e-08
6430	SRSF5	1.89056	1.3308e-07		4496	MT1H	1.88647	0.0075525
100132406	NBPF1	1.86534	0.00120771		7779	SLC30A1	1.76821	2.34609e-06
2861	GPR37	1.79254	1.42695e-07		2353	FOS	1.76646	9.11552e-08
NA	AK055561	1.78397	2.0178e-08		22822	PHLDA1	1.75245	0.000363832
22822	PHLDA1	1.68716	0.0010389		NA	AK055561	1.73558	1.04237e-08
8334	HIST1H2AC	1.67076	4.34405e-05		6430	SRSF5	1.7254	1.76528e-07
7779	SLC30A1	1.65752	1.42254e-05		1906	EDN1	1.6807	2.32196e-05
5629	PROX1	1.62935	0.00072155		1958	EGR1	1.63267	8.37304e-06
4609	MYC	1.60869	0.000982477		6430	SRSF5	1.60961	2.28035e-06
1958	EGR1	1.60302	2.20998e-05		55281	TMEM140	1.58305	1.58263e-07
1848	DUSP6	1.52928	0.000131785		7779	SLC30A1	1.58093	8.95412e-06
2353	FOS	1.51982	1.11768e-06		51619	UBE2D4	1.53402	4.04242e-05
1316	KLF6	1.48743	0.00152683		152007	GLIPR2	1.50451	3.61292e-05
55281	TMEM140	1.48309	7.48427e-07		338758	LOC338758	1.41629	0.000501157
338758	LOC338758	1.47864	0.000606261		375061	FAM89A	1.40518	1.08233e-05
7779	SLC30A1	1.46694	5.02673e-05		2861	GPR37	1.39827	1.59063e-06
375061	FAM89A	1.45847	4.52411e-05		8365	HIST1H4H	1.37465	0.000326306
1906	EDN1	1.41702	0.000401263		1316	KLF6	1.36263	0.0020483
57132	CHMP1B	1.40395	7.22397e-07		375061	FAM89A	1.35823	5.37746e-05
10137	CPNE1	1.40281	6.26071e-06		1848	DUSP6	1.35742	0.000264606
55500	ETNK1	1.39455	5.84025e-05		2296	FOXC1	1.34887	0.00128024
55603	FAM46A	1.38422	4.44573e-05		NA	TLE4	1.34531	7.47901e-08
NA	TLE4	1.37594	8.68909e-08		1316	KLF6	1.33922	0.00484726
1316	KLF6	1.37445	0.00611782		55339	WDR33	1.30485	2.82737e-06
85441	PRIC285	1.36827	6.57283e-07		51092	SIDT2	1.29605	0.000680305
2920	CXCL2	1.36585	1.55903e-05		2150	F2RL1	1.29035	5.67336e-06
375061	FAM89A	1.33513	2.83203e-05		8424	BBOX1	1.28083	1.55638e-07
3017	HIST1H2BD	1.33258	0.000412205		2920	CXCL2	1.25451	2.19799e-05
85236	HIST1H2BK	1.32634	0.000185566		8835	SOCS2	1.24333	0.000308208
4609	MYC	1.32142	0.000555683		1843	DUSP1	1.2411	0.000291264
55294	FBXW7	1.31068	0.000188386		23645	PPP1R15A	1.23868	1.07984e-05
51619	UBE2D4	1.30826	0.000563891		7057	THBS1	1.20121	0.00361163
7357	UGCG	1.29826	0.00108805		10468	FST	1.20059	0.000395873
678	ZFP36L2	1.29745	0.00253121		3017	HIST1H2BD	1.19111	0.000715857
8848	TSC22D1	1.29696	0.00109925		8334	HIST1H2AC	1.18081	0.00120584
344838	PAQR9	1.29676	0.00154365		23457	ABCB9	1.17532	4.40334e-06
8835	SOCS2	1.29132	0.000401528		54816	ZNF280D	1.1753	0.00170046
6431	SRSF6	1.28435	0.00152683		726	CAPN5	1.17022	0.000129101
64332	NFKBIZ	1.28353	0.0077741		10137	CPNE1	1.16979	2.94444e-05
8365	HIST1H4H	1.28171	0.0013016		26262	TSPAN17	1.15728	3.61331e-06
998	CDC42	1.27357	0.0093849		55500	ETNK1	1.15227	0.000288211
1848	DUSP6	1.25677	0.00409447		8347	HIST1H2BC	1.15191	0.00784752
493812	HCG11	1.2459	5.20371e-06		90231	KIAA2013	1.14724	2.96439e-07
2296	FOXC1	1.23158	0.00526277		375061	FAM89A	1.13883	0.000102908
55339	WDR33	1.22828	1.55215e-05		NA	LOC100129186	1.1379	1.37846e-05
7057	THBS1	1.21319	0.00535377		493812	HCG11	1.13199	8.47517e-06
375061	FAM89A	1.20357	0.000161345		8804	CREG1	1.12968	0.00954415
51092	SIDT2	1.19712	0.00269507		57132	CHMP1B	1.12346	8.01268e-06
10608	MXD4	1.19271	0.000336545		10505	SEMA4F	1.12029	0.00019807
9232	PTTG1	1.19263	9.52495e-06		84265	POLR3GL	1.11778	6.2205e-07
1525	CXADR	1.1899	2.77474e-06		56255	TMX4	1.10822	0.00219501
90231	KIAA2013	1.1891	4.04467e-07		85359	DGCR6L	1.10066	0.00121502
8424	BBOX1	1.1873	7.61837e-07		85236	HIST1H2BK	1.09637	0.00081195
NA	HIST2H2AA4	1.18106	0.00528144		9232	PTTG1	1.09274	1.32643e-05
83641	FAM107B	1.17106	0.000125454		678	ZFP36L2	1.08953	0.0075525
90427	BMF	1.1696	0.000103504		65258	MPPE1	1.0838	2.2137e-07
8445	DYRK2	1.16795	0.000293457		2872	MKNK2	1.08334	0.000360493
25945	PVRL3	1.16557	0.00528538		151613	TTC14	1.07604	0.000139613
3017	HIST1H2BD	1.16321	0.000485194		9260	PDLIM7	1.07279	0.00084718
4942	OAT	1.1584	0.00176161		130814	PQLC3	1.0684	0.000204383
2150	F2RL1	1.1433	6.07768e-05		90427	BMF	1.06438	0.000159699
151613	TTC14	1.13943	0.00034283		3484	IGFBP1	1.0631	3.42118e-05
1843	DUSP1	1.13681	0.00140905		29094	HSPC159	1.0628	0.000121958
221833	SP8	1.13603	0.00288339		6431	SRSF6	1.05563	0.00570004
7259	DSE	1.13514	1.85402e-06		65018	PINK1	1.05452	0.000534454
151613	TTC14	1.12097	0.000167199		8971	H1FX	1.0532	0.000179519
726	CAPN5	1.11489	0.000443805		NA	HIST2H2AA4	1.04484	0.00941318
152007	GLIPR2	1.11139	0.0021771		84918	LRP11	1.03385	0.000252829
8971	H1FX	1.11007	0.000188723		9846	GAB2	1.02336	5.29614e-06
440	ASNS	1.10233	8.61371e-05		51111	SUV420H1	1.02066	9.56402e-08
10672	GNA13	1.10021	0.00192953		55603	FAM46A	1.01975	0.000806248
10161	LPAR6	1.09912	1.0386e-05		56892	C8orf4	1.01939	0.00659417
2872	MKNK2	1.09864	0.000605936		7538	ZFP36	1.01876	0.00524375
79862	ZNF669	1.08354	0.00187988		151613	TTC14	1.00875	0.000677442
8970	HIST1H2BJ	1.08331	7.58695e-05		344838	PAQR9	0.994935	0.0103641
94241	TP53INP1	1.08208	6.78719e-05		NA	DGCR6L	0.991295	0.000240893
54805	CNNM2	1.06867	1.83005e-07		7855	FZD5	0.991126	0.00120584
4048	LTA4H	1.06742	4.16007e-05		115123	March3	0.98974	7.02131e-05
5147	PDE6D	1.0639	1.44438e-05		90231	KIAA2013	0.982437	7.5524e-06
26255	PTTG3	1.05724	8.74268e-05		857	CAV1	0.981202	1.31622e-06
195827	C9orf21	1.0518	0.00336793		10161	LPAR6	0.972221	2.30071e-05
10468	FST	1.04783	0.00286797		84962	JUB	0.97054	2.54855e-05
23568	ARL2BP	1.04691	9.52495e-06		1525	CXADR	0.970158	1.97974e-05
NA	GTF2IP1	1.03684	0.0104283		4609	MYC	0.967083	0.00664518
7855	FZD5	1.03564	0.00139751		27242	TNFRSF21	0.959697	0.00019807
84918	LRP11	1.03202	0.000510394		2261	FGFR3	0.95744	0.00143677
10924	SMPDL3A	1.02762	0.00610848		54805	CNNM2	0.955809	3.3382e-07
84265	POLR3GL	1.02697	5.29751e-06		85441	PRIC285	0.953046	4.30574e-05
51111	SUV420H1	1.02334	1.83005e-07		26255	PTTG3	0.949596	0.000158484
51669	TMEM66	1.02255	1.97167e-05		155066	ATP6V0E2	0.946876	0.00247219
3484	IGFBP1	1.01921	0.000125183		5866	RAB3IL1	0.943933	0.00710559
23204	ARL6IP1	1.01805	0.000835373		51181	DCXR	0.943396	0.00121886
56255	TMX4	1.01651	0.00782984		26190	FBXW2	0.941006	1.35581e-06
8555	CDC14B	1.01641	2.13579e-07		201164	PLD6	0.936719	0.00234369
23645	PPP1R15A	1.01361	0.000274368		3964	LGALS8	0.936164	0.000413946
90427	BMF	1.00773	8.00758e-05		348262	FAM195B	0.934205	0.000796358
9846	GAB2	0.998531	1.64481e-05		4942	OAT	0.933092	0.00777245
10955	SERINC3	0.998034	0.000818787		7108	TM7SF2	0.930597	0.000247744
9877	ZC3H11A	0.990095	0.00114515		3017	HIST1H2BD	0.930548	0.00260867
3093	UBE2K	0.987054	0.000983814		5594	MAPK1	0.928392	0.000167129
10236	HNRNPR	0.987051	0.000555683		10381	TUBB3	0.925124	0.000264734
7328	UBE2H	0.984706	2.88071e-05		8970	HIST1H2BJ	0.924841	0.00025009
23095	KIF1B	0.983208	0.00830721		645676	LOC645676	0.918813	1.65211e-07
80204	FBXO11	0.982767	0.00100708		4048	LTA4H	0.918462	0.000130612
115123	March3	0.981548	0.000157681		400027	LOC400027	0.917999	2.96439e-07
51111	SUV420H1	0.974439	0.00176889		23568	ARL2BP	0.914931	2.40574e-05
124491	TMEM170A	0.97385	4.16007e-05		57804	POLD4	0.900246	0.00374194
112936	VPS26B	0.972836	5.64683e-05		90427	BMF	0.898783	0.00015711
57570	TRMT5	0.971804	4.63019e-06		8545	CGGBP1	0.896104	2.39613e-06
23457	ABCB9	0.96885	0.000121849		NA	ZBTB7B	0.894243	3.5935e-07
221079	ARL5B	0.963555	1.03715e-07		138151	NACC2	0.890903	2.17527e-06
130814	PQLC3	0.962063	0.00121925		57570	TRMT5	0.885868	7.14268e-06
2932	GSK3B	0.955376	0.00102307		10608	MXD4	0.883715	0.00402902
59343	SENP2	0.955149	4.52411e-05		5147	PDE6D	0.881464	7.49721e-05
26234	FBXL5	0.952245	0.0012021		195827	C9orf21	0.88124	0.00984433
359948	IRF2BP2	0.94841	0.000390253		63917	GALNT11	0.880959	0.000711469
NA	CPNE1	0.94667	0.00175367		51706	CYB5R1	0.878633	0.00258989
1027	CDKN1B	0.942906	0.00183544		8555	CDC14B	0.876715	6.23462e-07
400027	LOC400027	0.9413	4.67291e-07		7259	DSE	0.875116	2.57343e-05
3099	HK2	0.940331	0.00093334		5900	RALGDS	0.872238	4.33816e-05
59343	SENP2	0.940192	0.00058493		112936	VPS26B	0.870626	0.000110576
858	CAV2	0.934393	0.0024544		51669	TMEM66	0.8673	7.84291e-05
7088	TLE1	0.933703	0.00751745		NA	DGCR6L	0.862532	0.00182726
8473	OGT	0.931125	3.03989e-05		51111	SUV420H1	0.860938	0.00344399
10252	SPRY1	0.927443	0.00535377		2932	GSK3B	0.859524	0.00165134
7546	ZIC2	0.925603	0.00518579		79469	BCMSUNL	0.85853	0.000672024
645676	LOC645676	0.921222	3.48862e-07		1453	CSNK1D	0.857255	0.000278856
NA	LOC100129186	0.91984	0.000401961		9232	PTTG1	0.856235	0.000520979
6654	SOS1	0.916868	1.0386e-05		NA	BSCL2	0.854963	0.00392846
2885	GRB2	0.915732	0.000590876		9419	CRIPT	0.852961	6.23462e-07
10505	SEMA4F	0.915719	0.00298013		6609	SMPD1	0.847541	0.00213608
9232	PTTG1	0.9133	0.000500455		84058	WDR54	0.846971	0.000690831
64121	RRAGC	0.91255	8.00114e-06		79960	PHF17	0.846047	0.000524746
3151	HMGN2	0.908222	4.10906e-05		7546	ZIC2	0.843765	0.00720731
30061	SLC40A1	0.90579	0.000861299		94241	TP53INP1	0.842381	0.000635638
94241	TP53INP1	0.904982	0.00229736		23625	FAM89B	0.840514	0.00491877
857	CAV1	0.900146	1.08825e-05		59343	SENP2	0.838834	0.00102353
80255	SLC35F5	0.899183	0.00266252		8654	PDE5A	0.838555	1.14737e-06
8848	TSC22D1	0.892798	0.00974994		23204	ARL6IP1	0.831762	0.00349143
7025	NR2F1	0.891343	0.00278281		57104	PNPLA2	0.829114	0.00121886
3151	HMGN2	0.891129	8.42653e-05		84925	DIRC2	0.825143	0.00170046
201164	PLD6	0.88916	0.00627892		858	CAV2	0.824264	0.00480357
138151	NACC2	0.888221	5.75877e-06		94241	TP53INP1	0.823812	0.0033794
29094	HSPC159	0.878512	0.00179559		60343	FAM3A	0.823449	1.86966e-05
27324	TOX3	0.877972	0.00258621		NA	CHN2	0.822874	0.000800822
4929	NR4A2	0.877302	9.52495e-06		135114	HINT3	0.819365	0.000251171
58528	RRAGD	0.870911	9.13338e-06		84647	PLA2G12B	0.818576	0.000457104
8935	SKAP2	0.867708	0.00563729		1979	EIF4EBP2	0.817533	0.00137388
665	BNIP3L	0.862813	0.0034732		221079	ARL5B	0.817445	3.5935e-07
26061	HACL1	0.860346	1.72052e-05		84858	ZNF503	0.809274	8.04988e-07
23582	CCNDBP1	0.858935	4.44573e-05		4790	NFKB1	0.80678	0.0027638
151195	CCNYL1	0.858573	0.00502151		8760	CDS2	0.801747	7.02131e-05
10611	PDLIM5	0.85252	9.35851e-05		59343	SENP2	0.797841	0.000204383
122786	FRMD6	0.851091	0.00531318		79022	TMEM106C	0.797601	0.000509401
8545	CGGBP1	0.850403	1.228e-05		124491	TMEM170A	0.797299	0.000232341
1647	GADD45A	0.849991	0.000948851		11258	DCTN3	0.793235	0.000711469
1979	EIF4EBP2	0.848866	0.0016907		133	ADM	0.787677	0.00043203
166815	TIGD2	0.846848	0.00275443		9371	KIF3B	0.787351	0.000102908
9371	KIF3B	0.844244	0.000819452		26061	HACL1	0.786729	2.53409e-05
84962	JUB	0.842825	0.000311016		55653	BCAS4	0.784096	0.00032386
90231	KIAA2013	0.842572	0.000113684		1609	DGKQ	0.78408	0.000543943
79469	BCMSUNL	0.842455	0.00151532		2571	GAD1	0.783337	0.00912644
7108	TM7SF2	0.842453	0.00135769		3151	HMGN2	0.782208	0.000128144
135114	HINT3	0.839264	0.000382087		58528	RRAGD	0.779839	1.77712e-05
8895	CPNE3	0.836687	0.000270011		63027	SLC22A23	0.776002	0.00742057
26190	FBXW2	0.83612	1.66292e-05		23582	CCNDBP1	0.77386	8.00953e-05
NA	APITD1	0.826452	2.77474e-06		83641	FAM107B	0.772157	0.00544071
7072	TIA1	0.822098	0.000268185		23457	ABCB9	0.770543	2.44144e-05
64756	ATPAF1	0.821267	0.000580521		3151	HMGN2	0.770406	0.000240893
8760	CDS2	0.820498	0.000109227		2243	FGA	0.769058	0.00607853
65018	PINK1	0.817888	0.0101003		26262	TSPAN17	0.762236	0.000939578
115123	March3	0.816468	0.00209671		140735	DYNLL2	0.758056	0.00549553
9969	MED13	0.816063	4.90756e-08		10137	CPNE1	0.757912	0.00160949
25852	ARMC8	0.812549	7.83479e-05		22920	KIFAP3	0.757701	0.00149856
84647	PLA2G12B	0.812218	0.00095363		118433	RPL23AP7	0.75748	0.000731002
NA	LOC283788	0.811803	0.00225229		151195	CCNYL1	0.752226	0.00561509
10137	CPNE1	0.809558	0.00149643		9117	SEC22C	0.751026	0.00112141
8654	PDE5A	0.808882	5.00806e-06		9267	CYTH1	0.750415	0.00393937
151195	CCNYL1	0.80857	0.00479759		359948	IRF2BP2	0.750263	0.00236986
5527	PPP2R5C	0.806863	0.00668475		151313	FAHD2B	0.74945	0.00141991
23192	ATG4B	0.806715	0.00147572		3093	UBE2K	0.745528	0.00805543
4790	NFKB1	0.806083	0.00465753		3590	IL11RA	0.744872	0.00556145
5728	PTEN	0.80247	0.000914888		994	CDC25B	0.743544	0.00480357
7328	UBE2H	0.799211	0.000843103		84309	NUDT16L1	0.743402	0.000622764
5594	MAPK1	0.792999	0.00173298		113622	ADPRHL1	0.741314	0.00081183
10124	ARL4A	0.791974	0.00780992		8473	OGT	0.741272	0.000249517
22920	KIFAP3	0.790862	0.00174176		652	BMP4	0.740562	0.000616339
9419	CRIPT	0.790116	5.00806e-06		9371	KIF3B	0.737645	0.00175132
9182	RASSF9	0.788558	0.0016603		2768	GNA12	0.736671	0.000143063
84858	ZNF503	0.78624	3.0878e-06		6772	STAT1	0.736163	0.00392846
348262	FAM195B	0.786072	0.00712024		146691	TOM1L2	0.73492	0.000180791
23464	GCAT	0.785163	6.02483e-05		1687	DFNA5	0.733386	0.00478337
133	ADM	0.784689	0.000865083		80139	ZNF703	0.730536	0.00169468
291	SLC25A4	0.784002	0.000207543		115817	DHRS1	0.726135	0.00234274
64327	LMBR1	0.78256	0.00136882		64327	LMBR1	0.725525	0.00163388
80139	ZNF703	0.780383	0.00157477		84310	C7orf50	0.724844	1.75465e-05
6609	SMPD1	0.779852	0.0074663		64121	RRAGC	0.722941	7.30104e-05
113263	GLCCI1	0.77919	0.00228487		9182	RASSF9	0.722632	0.00221383
2768	GNA12	0.774257	0.000155954		115123	March3	0.722433	0.00396009
84058	WDR54	0.774178	0.00301551		6654	SOS1	0.722405	0.000102908
83861	RSPH3	0.773246	3.48862e-07		27289	RND1	0.722292	0.00042476
6651	SON	0.772375	0.0011187		55765	C1orf106	0.722171	0.00111314
664	BNIP3	0.768089	0.000103504		9249	DHRS3	0.7194	1.86966e-05
901	CCNG2	0.767658	0.00081411		80148	PQLC1	0.717948	0.0025782
200845	KCTD6	0.767388	0.00135031		80325	ABTB1	0.715792	0.000653297
3964	LGALS8	0.7655	0.00542104		5533	PPP3CC	0.713566	0.000690831
9117	SEC22C	0.764707	0.00170514		79665	DHX40	0.709521	0.000524746
25	ABL1	0.762317	2.19129e-09		9969	MED13	0.709404	1.32538e-07
51128	SAR1B	0.761363	0.000589319		200810	ALG1L	0.708214	0.0102678
NA	BC038747	0.760086	6.46345e-06		23192	ATG4B	0.7077	0.00302161
79960	PHF17	0.758606	0.00284911		2132	EXT2	0.707001	0.00461782
10492	SYNCRIP	0.75349	0.00366053		747	DAGLA	0.70456	0.00654979
10381	TUBB3	0.75091	0.00409243		113263	GLCCI1	0.701095	0.00373881
51228	GLTP	0.750375	0.000167199		9117	SEC22C	0.700869	4.31346e-06
57404	CYP20A1	0.749141	0.0017313		NA	APITD1	0.699739	1.13746e-05
3925	STMN1	0.747521	1.72052e-05		25	ABL1	0.69967	3.71198e-09
9249	DHRS3	0.746487	2.42055e-05		1601	DAB2	0.698387	0.00211556
196	AHR	0.746046	5.20876e-05		64756	ATPAF1	0.697967	0.00167876
51535	PPHLN1	0.745556	0.000554667		56834	GPR137	0.697864	0.0039242
140460	ASB7	0.745422	4.89495e-07		84102	SLC41A2	0.697066	0.00178758
55069	C7orf42	0.744573	4.42711e-05		150465	TTL	0.696107	0.000337373
125488	TTC39C	0.740012	0.00295542		255758	TM4SF19	0.695356	0.000666939
8445	DYRK2	0.739758	0.00424331		8799	PEX11B	0.695203	9.85616e-05
114876	OSBPL1A	0.739699	0.00233198		NA	BC038747	0.694495	9.42845e-06
10927	SPIN1	0.739409	0.00425919		100272147	MTCP1NB	0.693343	0.000135575
9749	PHACTR2	0.738214	0.00171294		23677	SH3BP4	0.692499	0.00452625
8843	GPR109B	0.737371	0.00176051		90313	TP53I13	0.691036	0.000408049
3516	RBPJ	0.735301	0.00852048		54432	YIPF1	0.688208	0.00577359
9117	SEC22C	0.734586	5.29751e-06		83861	RSPH3	0.68771	6.90463e-07
2729	GCLC	0.734504	0.00122497		22926	ATF6	0.687656	0.00036687
5605	MAP2K2	0.734263	0.00541873		54432	YIPF1	0.686898	0.00180202
10611	PDLIM5	0.732663	0.000730066		340348	TSPAN33	0.686401	0.00208632
84196	USP48	0.732534	0.00975886		55845	C3orf10	0.685749	0.00523167
79070	KDELC1	0.732015	0.00019375		901	CCNG2	0.685714	0.00139917
7263	TST	0.729491	0.00157865		5728	PTEN	0.685132	0.0024488
8660	IRS2	0.729184	0.000367906		5412	UBL3	0.683826	0.000246859
8767	RIPK2	0.729029	0.00733586		30061	SLC40A1	0.683726	0.00722311
5937	RBMS1	0.725047	0.00608856		9896	FIG4	0.682822	0.00475782
159013	CXorf38	0.72487	0.000109051		55349	CHDH	0.681557	1.08233e-05
27242	TNFRSF21	0.724263	0.00612339		10672	GNA13	0.67909	0.00218027
994	CDC25B	0.723373	0.00940479		22933	SIRT2	0.673768	0.000200025
11067	C10orf10	0.72323	0.00865489		55831	TMEM111	0.672801	3.33863e-05
339122	RAB43	0.72288	3.14711e-06		7263	TST	0.668966	0.00211213
3839	KPNA3	0.722797	0.00847518		222389	BEND7	0.667595	0.00170421
10468	FST	0.722135	0.00788127		79134	TMEM185B	0.666545	0.0078577
NA	UBE2V1	0.721865	0.000976928		114299	AKAP2	0.664573	0.000164839
10670	RRAGA	0.721724	0.000958842		3181	HNRNPA2B1	0.66389	0.000190674
26262	TSPAN17	0.721105	0.00216451		2132	EXT2	0.662008	0.0066522
79134	TMEM185B	0.720377	0.00637607		NA	RNASEK-C17ORF49	0.661975	0.00151516
114926	C8orf40	0.719115	0.000403723		140460	ASB7	0.660858	1.14172e-06
143686	SESN3	0.718471	0.000103091		79962	DNAJC22	0.660857	0.00553477
10313	RTN3	0.71823	0.000809167		55848	C9orf46	0.659231	3.082e-05
8555	CDC14B	0.716742	5.84025e-05		23479	ISCU	0.653554	6.02473e-05
NA	ZBTB7B	0.715858	1.86632e-05		200845	KCTD6	0.653062	0.0037474
440270	GOLGA8B	0.715833	0.00277695		55532	SLC30A10	0.651939	0.00813906
23457	ABCB9	0.715083	0.000136961		414	ARSD	0.651879	0.00461782
9371	KIF3B	0.715058	0.00061971		7072	TIA1	0.651581	0.00170046
4097	MAFG	0.708957	0.000938118		8660	IRS2	0.651289	0.00065427
79786	KLHL36	0.708326	2.5828e-05		339122	RAB43	0.649271	6.19089e-06
55349	CHDH	0.706417	1.47561e-05		51228	GLTP	0.648196	0.000462592
79647	AKIRIN1	0.702393	0.00547057		27086	FOXP1	0.6461	0.000464247
63917	GALNT11	0.699007	0.0104246		11147	HHLA3	0.646028	0.00176432
64764	CREB3L2	0.698014	0.00356929		55069	C7orf42	0.645627	0.000129205
22936	ELL2	0.697559	0.00553558		221	ALDH3B1	0.644863	0.00837557
84279	PRADC1	0.696343	0.00394261		54842	MFSD6	0.64459	9.3435e-05
NA	CHN2	0.696233	0.00677862		84885	ZDHHC12	0.643682	0.00665647
4329	ALDH6A1	0.694636	0.00940479		125488	TTC39C	0.643285	0.00652979
118433	RPL23AP7	0.694298	0.00308563		NA	RAB43	0.642994	5.8224e-05
5900	RALGDS	0.693805	0.0012264		5420	PODXL	0.642064	0.000585669
NA	C13orf18	0.691693	1.20094e-05		84279	PRADC1	0.641954	0.00503401
7323	UBE2D3	0.688872	0.00678249		10492	SYNCRIP	0.640532	0.00939717
11072	DUSP14	0.688359	0.00028659		143686	SESN3	0.639127	0.000205326
84309	NUDT16L1	0.688065	0.00242304		10152	ABI2	0.638708	0.000266722
51321	AMZ2	0.687221	0.00117232		90410	IFT20	0.63774	0.00518631
NA	RAB43	0.68711	5.20876e-05		3925	STMN1	0.637683	6.51208e-05
1647	GADD45A	0.68667	0.00426167		51239	ANKRD39	0.636564	0.0022316
65258	MPPE1	0.68641	0.000204346		4929	NR4A2	0.634367	0.000258396
55532	SLC30A10	0.684888	0.00830721		663	BNIP2	0.634014	0.000151021
440	ASNS	0.6844	0.00735521		664	BNIP3	0.63348	0.000487226
128387	TATDN3	0.68428	0.000239729		79929	MAP6D1	0.632369	0.00142114
404672	GTF2H5	0.683581	2.17195e-05		527	ATP6V0C	0.629487	0.00239298
55339	WDR33	0.682218	0.00251475		285368	PRRT3	0.628845	0.00142246
728855	LOC728855	0.682107	0.00716138		2729	GCLC	0.626888	0.00333045
6651	SON	0.682086	0.000228192		25923	ATL3	0.626815	0.00162621
10966	RAB40B	0.678315	1.30736e-05		114876	OSBPL1A	0.626249	0.00659417
6738	TROVE2	0.676731	0.00102186		196	AHR	0.624271	0.000227956
5412	UBL3	0.67666	0.000546331		9341	VAMP3	0.623842	0.000690963
5165	PDK3	0.676509	0.00409317		2743	GLRB	0.623652	5.7352e-05
114299	AKAP2	0.674912	0.000272264		2110	ETFDH	0.623316	0.0077671
219771	CCNY	0.674678	0.000810145		389289	C5orf39	0.623182	0.00355917
5533	PPP3CC	0.673379	0.00224212		26090	ABHD12	0.623182	0.00544202
51626	DYNC2LI1	0.673356	0.00450158		51321	AMZ2	0.621588	0.00177241
7681	MKRN3	0.672432	4.10906e-05		291	SLC25A4	0.620488	0.00141991
113622	ADPRHL1	0.670621	0.0038477		9063	PIAS2	0.619567	0.00912644
84277	DNAJC30	0.670077	2.41696e-05		55653	BCAS4	0.618899	0.00935815
150465	TTL	0.669482	0.000984516		NA	RPL23AP7	0.617484	0.00177726
22858	ICK	0.668065	0.00271949		55640	FLVCR2	0.617169	0.000337373
261726	TIPRL	0.667099	0.00771006		7328	UBE2H	0.616961	0.00297535
79022	TMEM106C	0.666998	0.00528144		8843	GPR109B	0.615421	0.00570295
115123	March3	0.662721	0.00359894		25852	ARMC8	0.614396	0.000957245
1912	PHC2	0.65827	0.00578972		10966	RAB40B	0.612916	2.23283e-05
100272147	MTCP1NB	0.657184	0.000496518		128387	TATDN3	0.611476	0.000444606
2743	GLRB	0.656843	6.18462e-05		51100	SH3GLB1	0.610369	0.00421496
3181	HNRNPA2B1	0.654803	0.000442358		4320	MMP11	0.60962	2.54855e-05
10672	GNA13	0.65479	0.00518579		7681	MKRN3	0.609491	6.77349e-05
10238	WDR68	0.654384	0.00266252		90141	EFCAB11	0.608695	0.0041026
222389	BEND7	0.652695	0.00271603		11345	GABARAPL2	0.608091	8.95412e-06
221079	ARL5B	0.651652	0.000277087		55194	FAM176B	0.606959	0.000229798
60343	FAM3A	0.6501	0.000673136		55296	TBC1D19	0.606724	0.000101047
55251	PCMTD2	0.647602	0.00171294		205564	SENP5	0.606665	6.92252e-05
90141	EFCAB11	0.644332	0.00401962		51128	SAR1B	0.606643	0.00324357
51103	NDUFAF1	0.644034	0.00181661		404672	GTF2H5	0.606293	4.76226e-05
6229	RPS24	-0.64579	0.000453003		79786	KLHL36	0.606148	9.26141e-05
6723	SRM	-0.646555	0.000670167		25798	BRI3	0.606112	0.000444606
2582	GALE	-0.64666	0.00547057		6472	SHMT2	-0.604773	4.71381e-06
27077	B9D1	-0.649048	0.00209671		10327	AKR1A1	-0.607249	0.00191691
3182	HNRNPAB	-0.649457	6.07768e-05		79019	CENPM	-0.608067	0.00547714
27077	B9D1	-0.649731	0.000899907		9474	ATG5	-0.609239	0.00645381
4793	NFKBIB	-0.649989	0.00157573		8664	EIF3D	-0.60961	0.00109228
79017	GGCT	-0.650106	8.08798e-05		100885850	AARSD1	-0.610824	0.000770859
79763	ISOC2	-0.652671	0.000340057		119559	SFXN4	-0.612321	0.0016484
100288413	LOC100288413	-0.653167	0.000209927		949	UBC	-0.612425	0.0066522
8894	EIF2S2	-0.653565	0.00277935		2888	GRB14	-0.613204	0.00448948
8914	TIMELESS	-0.655002	0.000273758		10205	MPZL2	-0.618099	0.00252379
51557	LGSN	-0.655218	0.000274368		11019	LIAS	-0.618159	0.00782677
126969	SLC44A3	-0.656513	0.00187351		27077	B9D1	-0.619045	0.0019054
1595	CYP51A1	-0.657114	0.00302572		83877	TM2D2	-0.619788	4.33816e-05
6616	SNAP25	-0.659891	6.11176e-06		10483	SEC23B	-0.621814	0.000965801
51668	HSPB11	-0.660221	0.00328404		30000	TNPO2	-0.622292	0.00751745
27243	CHMP2A	-0.661808	0.0102158		22889	KIAA0907	-0.62251	0.000196639
55825	PECR	-0.662466	0.00185807		6319	SCD	-0.623343	2.96677e-05
55540	IL17RB	-0.66259	0.0079802		3837	KPNB1	-0.625998	0.00151381
9361	LONP1	-0.664944	0.0037973		440585	FAM183A	-0.629595	0.00286105
2786	GNG4	-0.665496	0.00610661		100101266	LOC100101266	-0.632287	5.18914e-05
NA	AY358864	-0.666149	0.00191715		637	BID	-0.635467	0.000230264
9416	DDX23	-0.668836	0.000139893		79017	GGCT	-0.635739	0.00700077
10280	SIGMAR1	-0.672396	0.000206669		5902	RANBP1	-0.635771	1.13746e-05
57647	DHX37	-0.673503	0.00262116		6476	SI	-0.636907	0.0019384
4015	LOX	-0.674163	0.00109422		39	ACAT2	-0.637218	0.000132281
50865	HEBP1	-0.674799	0.000220131		3376	IARS	-0.639404	0.00165172
9277	WDR46	-0.677229	0.000311016		55859	BEX1	-0.639493	0.000927953
6476	SI	-0.678082	0.00182699		47	ACLY	-0.639911	0.000753152
2690	GHR	-0.6782	0.00335453		9949	AMMECR1	-0.640161	5.37746e-05
999	CDH1	-0.68045	0.00730181		1891	ECH1	-0.643927	0.000260047
10280	SIGMAR1	-0.680792	0.000147424		55723	ASF1B	-0.643936	0.000670706
10327	AKR1A1	-0.683228	0.00104874		3315	HSPB1	-0.645442	0.00786914
6652	SORD	-0.684108	0.00367817		6897	TARS	-0.645879	0.00378512
51065	RPS27L	-0.688362	1.54199e-05		1163	CKS1B	-0.646382	0.000939578
7936	RDBP	-0.691187	0.00100675		55755	CDK5RAP2	-0.646561	0.00135649
2202	EFEMP1	-0.693284	0.0104246		6723	SRM	-0.646955	0.000337373
3070	HELLS	-0.693887	0.000426426		3326	HSP90AB1	-0.648335	0.00310407
65003	MRPL11	-0.695388	0.00196648		56893	UBQLN4	-0.649019	0.00314899
275	AMT	-0.695972	0.000778882		4050	LTB	-0.650091	0.0039159
55748	CNDP2	-0.696656	2.20628e-05		54813	KLHL28	-0.651049	4.04242e-05
84964	ALKBH6	-0.69829	0.00490259		130026	ICA1L	-0.652068	2.54855e-05
79075	DSCC1	-0.698392	0.000899846		NA	AI241366	-0.65318	0.00890018
2787	GNG5	-0.69847	0.00351179		4691	NCL	-0.654926	0.00139621
5976	UPF1	-0.698532	0.000680958		27018	NGFRAP1	-0.655933	0.000129205
3300	DNAJB2	-0.700307	0.000103592		1528	CYB5A	-0.65806	8.43475e-06
85012	TCEAL3	-0.700894	0.00283129		2653	GCSH	-0.658225	0.000344952
7423	VEGFB	-0.701523	0.0024251		8458	TTF2	-0.659566	0.00441763
23452	ANGPTL2	-0.701657	3.98699e-05		257019	FRMD3	-0.660597	0.00954415
5595	MAPK3	-0.702482	0.00511227		26472	PPP1R14B	-0.661786	0.00461782
3315	HSPB1	-0.702613	0.00602035		23590	PDSS1	-0.662061	0.00105619
2653	GCSH	-0.705248	0.00109422		22862	FNDC3A	-0.662294	0.000171272
79019	CENPM	-0.708835	0.00216872		54997	TESC	-0.66253	0.000560199
10280	SIGMAR1	-0.710804	0.000235688		10947	AP3M2	-0.663192	6.04341e-07
3306	HSPA2	-0.710948	0.00419652		28976	ACAD9	-0.663688	0.000177352
5902	RANBP1	-0.712051	7.05741e-05		9131	AIFM1	-0.6638	0.000353395
55859	BEX1	-0.712278	0.000563891		56339	METTL3	-0.66474	0.00293185
1910	EDNRB	-0.71255	0.00134208		63910	SLC17A9	-0.665953	0.00700077
3306	HSPA2	-0.714366	0.00394261		55197	RPRD1A	-0.666635	0.00152159
30000	TNPO2	-0.716949	0.00345414		51585	PCF11	-0.667217	0.000464062
NA	BX110351	-0.719842	0.000182536		50865	HEBP1	-0.667229	0.000129704
1891	ECH1	-0.720549	0.000139893		7867	MAPKAPK3	-0.667778	0.000509401
374868	ATP9B	-0.721905	2.77474e-06		23306	TMEM194A	-0.668248	1.86966e-05
7169	TPM2	-0.72404	0.00505761		56906	THAP10	-0.673688	9.38353e-05
3192	HNRNPU	-0.725038	4.18981e-05		433	ASGR2	-0.675429	0.000101047
5198	PFAS	-0.725798	0.00214236		1854	DUT	-0.676845	0.000148395
11284	PNKP	-0.727119	0.000150436		30833	NT5C	-0.677957	0.0082147
2264	FGFR4	-0.728678	0.00115228		4547	MTTP	-0.678325	0.00216816
1644	DDC	-0.730263	0.000958842		5570	PKIB	-0.678963	0.00662862
23223	RRP12	-0.730815	0.00187351		79071	ELOVL6	-0.679725	4.07428e-07
4927	NUP88	-0.731227	0.00173841		8894	EIF2S2	-0.67992	0.00107823
NA	MIFR-1	-0.734552	0.000299309		5198	PFAS	-0.680663	0.00231329
55621	TRMT1	-0.73484	2.77474e-06		79075	DSCC1	-0.682328	0.000605395
11343	MGLL	-0.7365	0.00211403		2264	FGFR4	-0.683507	2.89596e-05
2202	EFEMP1	-0.736678	0.0104195		79763	ISOC2	-0.684591	9.85616e-05
11186	RASSF1	-0.73673	0.00366053		51144	HSD17B12	-0.685054	0.00655272
56906	THAP10	-0.738002	6.07768e-05		10327	AKR1A1	-0.68737	0.000387067
26472	PPP1R14B	-0.741662	0.000778882		26873	OPLAH	-0.689627	0.00380529
1468	SLC25A10	-0.741722	0.000149652		3936	LCP1	-0.691784	0.00912644
221061	FAM171A1	-0.741833	0.00212988		4258	MGST2	-0.692003	3.63909e-05
166	AES	-0.742867	0.0018743		51663	ZFR	-0.696603	2.57343e-05
28969	BZW2	-0.744763	1.74583e-05		93664	CADPS2	-0.697484	0.000240893
8558	CDK10	-0.747744	0.000859923		3192	HNRNPU	-0.698321	2.99421e-05
10452	TOMM40	-0.748166	0.000687614		9361	LONP1	-0.69899	0.00135649
64855	FAM129B	-0.748356	0.000281641		5245	PHB	-0.701582	1.84215e-05
55240	STEAP3	-0.748625	3.48862e-07		8842	PROM1	-0.701873	0.00161045
57109	REXO4	-0.748761	0.00247106		4072	EPCAM	-0.703206	0.00879243
28976	ACAD9	-0.748813	8.34287e-05		7358	UGDH	-0.703265	0.000900704
7106	TSPAN4	-0.749187	0.00597394		4815	NINJ2	-0.704512	0.00128296
93664	CADPS2	-0.752496	0.000192115		7866	IFRD2	-0.705054	0.000180791
5832	ALDH18A1	-0.754637	3.76616e-05		23279	NUP160	-0.706782	0.0037474
130013	ACMSD	-0.754656	0.00122898		27077	B9D1	-0.708083	0.000177352
10606	PAICS	-0.755478	2.77474e-06		6229	RPS24	-0.708684	7.48636e-05
307	ANXA4	-0.755795	0.0094131		4047	LSS	-0.710552	4.23301e-05
2027	ENO3	-0.760976	1.44438e-05		4595	MUTYH	-0.710728	0.00361861
55755	CDK5RAP2	-0.762284	0.000447896		55245	UQCC	-0.710915	6.2205e-07
924	CD7	-0.765214	0.00242418		4860	PNP	-0.711046	7.05597e-05
26472	PPP1R14B	-0.766007	0.00192597		130576	LYPD6B	-0.711069	0.000367777
7866	IFRD2	-0.767362	0.000133208		55540	IL17RB	-0.713079	0.00255405
10947	AP3M2	-0.768723	2.0871e-07		471	ATIC	-0.715344	0.00042476
220832	FABP5L3	-0.772328	0.00280672		NA	RPL36A	-0.715402	0.00461782
55210	ATAD3A	-0.77276	0.000737781		7264	TSTA3	-0.718465	0.00398581
2288	FKBP4	-0.778217	2.5943e-07		7169	TPM2	-0.718758	0.000147421
79783	C7orf10	-0.77854	1.44438e-05		29974	A1CF	-0.718944	2.12011e-05
6507	SLC1A3	-0.78269	0.00157727		11015	KDELR3	-0.720526	0.000960157
54985	HCFC1R1	-0.785144	0.00541873		1890	TYMP	-0.726256	0.00762955
27122	DKK3	-0.785292	0.0077741		79017	GGCT	-0.726314	8.95412e-06
3856	KRT8	-0.78826	0.000187818		5902	RANBP1	-0.730427	2.33037e-05
NA	RANBP1	-0.790331	3.42738e-05		999	CDH1	-0.731235	0.00231329
50848	F11R	-0.792648	0.00295319		1910	EDNRB	-0.731484	0.000547671
348093	RBPMS2	-0.7951	0.00787466		307	ANXA4	-0.733772	0.00786914
81888	HYI	-0.796027	0.00224359		7014	TERF2	-0.734093	0.00419973
908	CCT6A	-0.796649	1.15913e-05		1462	VCAN	-0.734534	0.00701564
5507	PPP1R3C	-0.800729	0.00158471		87	ACTN1	-0.736218	9.60267e-05
9497	SLC4A7	-0.803198	0.00267348		275	AMT	-0.73863	0.000204383
1163	CKS1B	-0.804839	1.64481e-05		1503	CTPS	-0.739044	0.000557257
4832	NME3	-0.807315	0.00157048		1644	DDC	-0.740188	0.000434497
2242	FES	-0.807737	0.000100313		23231	SEL1L3	-0.741215	0.00568303
10606	PAICS	-0.809213	2.53123e-07		3306	HSPA2	-0.741359	0.00164591
5595	MAPK3	-0.810205	0.00211159		28969	BZW2	-0.743108	8.53115e-06
55215	FANCI	-0.811557	5.07965e-06		1595	CYP51A1	-0.744562	0.000475702
83877	TM2D2	-0.812013	2.77474e-06		4832	NME3	-0.744712	0.00196306
7205	TRIP6	-0.812178	0.0101489		348093	RBPMS2	-0.745007	0.00880037
11000	SLC27A3	-0.814519	0.000136961		51557	LGSN	-0.745602	2.55383e-05
10797	MTHFD2	-0.814832	2.87348e-06		55920	RCC2	-0.747492	5.37746e-05
4050	LTB	-0.816113	0.000730066		6319	SCD	-0.748015	0.000129205
3990	LIPC	-0.816577	4.30847e-05		10962	MLLT11	-0.748164	0.00889675
2634	GBP2	-0.817758	9.91575e-06		10053	AP1M2	-0.750695	2.19799e-05
84899	TMTC4	-0.81784	1.98535e-05		84899	TMTC4	-0.752036	2.63325e-05
1854	DUT	-0.82161	2.64666e-05		115749	C12orf56	-0.752723	0.000451889
216	ALDH1A1	-0.822038	0.00432186		6418	SET	-0.752741	0.00105659
79071	ELOVL6	-0.823076	8.45351e-08		196483	FAM86A	-0.75364	1.58263e-07
51537	MTFP1	-0.823091	0.0104072		79783	C7orf10	-0.75704	9.37237e-06
2618	GART	-0.823104	0.000626924		55920	RCC2	-0.759868	7.70649e-05
64847	SPATA20	-0.823648	0.00125193		3856	KRT8	-0.764732	0.00110274
9718	ECE2	-0.827018	0.00019375		7106	TSPAN4	-0.76502	0.00553477
27018	NGFRAP1	-0.827973	2.02645e-05		47	ACLY	-0.767057	0.000735786
440585	FAM183A	-0.828297	0.000298508		26472	PPP1R14B	-0.768791	0.000266722
445	ASS1	-0.828767	0.00154365		5649	RELN	-0.771198	1.11985e-05
29925	GMPPB	-0.832654	0.000984516		54971	BANP	-0.771686	0.00860153
55723	ASF1B	-0.833997	6.52034e-05		11015	KDELR3	-0.773702	5.97175e-07
113655	MFSD3	-0.834718	0.000498453		6732	SRPK1	-0.775943	6.5764e-05
56893	UBQLN4	-0.836835	0.000425852		NA	RANBP1	-0.776532	1.97872e-05
5213	PFKM	-0.839327	0.000891137		26035	GLCE	-0.776957	0.00493229
5335	PLCG1	-0.839668	0.00658069		56301	SLC7A10	-0.777468	7.40808e-07
84300	C6orf125	-0.83976	0.00392192		7351	UCP2	-0.778042	0.0021118
1503	CTPS	-0.841109	0.000254151		29925	GMPPB	-0.778667	0.000716225
11182	SLC2A6	-0.841573	0.00233198		3856	KRT8	-0.780225	0.000106936
9415	FADS2	-0.844749	0.000322227		118881	COMTD1	-0.78124	1.52827e-05
5909	RAP1GAP	-0.846767	2.87096e-05		4927	NUP88	-0.784041	0.000456264
1290	COL5A2	-0.848027	0.000723754		9045	RPL14	-0.784088	0.00348213
23306	TMEM194A	-0.850019	1.5602e-06		445	ASS1	-0.784989	0.00147256
22948	CCT5	-0.851159	9.58022e-06		3306	HSPA2	-0.785211	0.000883728
1627	DBN1	-0.851846	0.00262116		55825	PECR	-0.789046	0.000149953
4552	MTRR	-0.852729	7.75651e-06		55120	FANCL	-0.789288	0.00106897
3294	HSD17B2	-0.85886	0.00730839		5328	PLAU	-0.790786	0.00293185
54498	SMOX	-0.863661	0.00629018		1806	DPYD	-0.791512	0.00512141
9406	ZRANB2	-0.865055	0.00405881		8463	TEAD2	-0.792151	0.000218008
55920	RCC2	-0.86614	1.70015e-05		27018	NGFRAP1	-0.797966	1.60369e-05
7867	MAPKAPK3	-0.867039	4.52411e-05		79228	THOC6	-0.798972	6.04341e-07
4173	MCM4	-0.86709	0.00736878		1163	CKS1B	-0.800196	8.37304e-06
3315	HSPB1	-0.867208	0.00211403		55140	ELP3	-0.802289	0.00612823
2592	GALT	-0.868127	0.00387204		5648	MASP1	-0.805328	0.00170046
7351	UCP2	-0.869046	0.00123605		79019	CENPM	-0.806461	0.000315497
5649	RELN	-0.870392	5.07965e-06		4678	NASP	-0.809956	1.86966e-05
57706	DENND1A	-0.874279	0.000155855		79003	MIS12	-0.817489	0.0023672
6604	SMARCD3	-0.87777	0.000345533		7035	TFPI	-0.817785	0.00294422
31	ACACA	-0.882305	0.00121815		26577	PCOLCE2	-0.821819	0.000118422
5648	MASP1	-0.882447	0.00652915		2264	FGFR4	-0.827968	0.000147421
10205	MPZL2	-0.882704	0.000702733		2892	GRIA3	-0.828159	0.00138467
6732	SRPK1	-0.883394	2.57292e-05		119559	SFXN4	-0.831388	3.61331e-06
10726	NUDC	-0.884337	0.00121815		9497	SLC4A7	-0.831388	0.00109074
10449	ACAA2	-0.885099	8.28379e-06		22948	CCT5	-0.834682	5.29614e-06
130576	LYPD6B	-0.885978	8.69514e-06		2653	GCSH	-0.835567	8.28989e-05
NA	RPL36A	-0.886781	0.000995761		10162	LPCAT3	-0.837941	0.000513294
284111	SLC13A5	-0.887121	0.00164203		7301	TYRO3	-0.839954	0.00386269
13	AADAC	-0.888868	0.00339063		29974	A1CF	-0.841663	2.0592e-06
3373	HYAL1	-0.89357	0.000201236		6627	SNRPA1	-0.844396	0.00292847
55245	UQCC	-0.89577	8.45351e-08		79711	IPO4	-0.853144	0.000651976
4597	MVD	-0.899523	0.00023208		6594	SMARCA1	-0.85354	0.000918197
56301	SLC7A10	-0.899994	2.53123e-07		80205	CHD9	-0.853887	0.000513294
57418	WDR18	-0.903412	4.3602e-05		27230	SERP1	-0.855581	0.00593836
119559	SFXN4	-0.904352	2.77474e-06		10635	RAD51AP1	-0.858637	0.00180685
4922	NTS	-0.904954	0.00788778		23594	ORC6	-0.861524	0.00360276
10049	DNAJB6	-0.907037	8.2374e-05		4552	MTRR	-0.863432	2.45942e-06
8463	TEAD2	-0.90912	8.40078e-05		10946	SF3A3	-0.863541	0.00181269
29925	GMPPB	-0.909761	0.000246922		25902	MTHFD1L	-0.867418	1.58086e-06
25902	MTHFD1L	-0.910721	1.98388e-06		5976	UPF1	-0.867905	2.39717e-05
30833	NT5C	-0.910759	0.00087628		130013	ACMSD	-0.870514	0.000132281
7264	TSTA3	-0.911185	0.000672427		3856	KRT8	-0.871265	9.02605e-06
8842	PROM1	-0.921145	0.000155855		3475	IFRD1	-0.874874	0.00818306
50814	NSDHL	-0.923317	0.000443805		5646	PRSS3	-0.875006	0.00141598
79814	AGMAT	-0.926681	0.00188425		10205	MPZL2	-0.876067	0.000393072
54498	SMOX	-0.928794	0.000553355		5832	ALDH18A1	-0.877038	2.0592e-06
2810	SFN	-0.932134	2.62007e-05		84513	PPAPDC1B	-0.877048	9.11552e-08
2560	GABRB1	-0.933049	0.000576183		908	CCT6A	-0.877789	1.18938e-06
1786	DNMT1	-0.934189	0.00142674		10606	PAICS	-0.877849	1.58263e-07
54961	SSH3	-0.934316	0.000851328		6720	SREBF1	-0.879188	0.000258396
5422	POLA1	-0.935458	0.00171294		148398	SAMD11	-0.882084	0.0066522
7301	TYRO3	-0.935822	0.00230842		5507	PPP1R3C	-0.883003	0.00029974
55920	RCC2	-0.938746	1.08825e-05		4015	LOX	-0.883478	2.24399e-05
5245	PHB	-0.939217	6.57283e-07		3026	HABP2	-0.883697	0.00385127
196483	FAM86A	-0.939754	2.0178e-08		57418	WDR18	-0.883829	2.55383e-05
7169	TPM2	-0.940607	1.02326e-05		216	ALDH1A1	-0.883841	0.00295301
27131	SNX5	-0.940847	0.00028427		3992	FADS1	-0.894338	4.40692e-05
2892	GRIA3	-0.943154	0.000671687		2810	SFN	-0.900203	1.9213e-05
100133941	DQ893812	-0.94384	0.00291468		84059	GPR98	-0.900587	0.000512526
79228	THOC6	-0.944482	1.69792e-07		3373	HYAL1	-0.901633	9.3435e-05
5328	PLAU	-0.944858	0.000896289		113655	MFSD3	-0.903868	9.96996e-05
84059	GPR98	-0.950766	0.000553355		NA	BX110351	-0.904646	4.40334e-06
11322	TMC6	-0.957956	0.000711328		5591	PRKDC	-0.912586	3.5935e-07
118881	COMTD1	-0.963771	1.93967e-06		100133941	DQ893812	-0.918874	0.00221678
54997	TESC	-0.963985	1.19997e-05		29925	GMPPB	-0.918988	0.000171272
NA	BOLA2B	-0.964231	0.0080407		1373	CPS1	-0.920053	0.000577879
4678	NASP	-0.965337	3.93963e-06		3990	LIPC	-0.923432	3.61331e-06
79077	DCTPP1	-0.971941	0.00306938		27131	SNX5	-0.92492	0.000177352
10162	LPCAT3	-0.979914	0.000167199		10797	MTHFD2	-0.924931	2.2137e-07
114571	SLC22A9	-0.987257	0.000390826		55719	FAM178A	-0.9262	0.0100133
79019	CENPM	-0.989957	5.42543e-05		4174	MCM5	-0.926805	0.00925687
NA	ACY1	-0.995118	0.000451959		316	AOX1	-0.930135	0.00122897
83959	SLC4A11	-0.996885	0.00454414		2892	GRIA3	-0.933104	0.00122897
31	ACACA	-0.997735	0.000159371		23175	LPIN1	-0.934965	0.000162694
9045	RPL14	-0.998676	0.000546331		4830	NME1	-0.936027	2.41354e-05
4640	MYO1A	-1.00122	0.000119311		10049	DNAJB6	-0.937331	2.44608e-05
4174	MCM5	-1.00835	0.00712886		6662	SOX9	-0.938436	0.00907315
4837	NNMT	-1.0095	0.00184872		706	TSPO	-0.93983	0.00380901
4595	MUTYH	-1.00959	0.000158737		4640	MYO1A	-0.942321	0.00012553
5174	PDZK1	-1.01393	0.00195514		4173	MCM4	-0.942778	0.00209577
4860	PNP	-1.02539	1.05506e-06		NA	ACY1	-0.942994	0.000420077
1890	TYMP	-1.02943	0.000443805		5648	MASP1	-0.944081	0.00213832
26019	UPF2	-1.0395	2.74898e-06		56915	EXOSC5	-0.968775	2.95689e-06
3276	PRMT1	-1.04091	2.41696e-05		5422	POLA1	-0.969652	0.000647332
316	AOX1	-1.04351	0.000697594		4922	NTS	-0.970862	0.00259486
4815	NINJ2	-1.04403	2.56495e-05		27346	TMEM97	-0.970997	0.00400312
3880	KRT19	-1.04472	0.00229254		5699	PSMB10	-0.972089	0.000321715
11186	RASSF1	-1.0462	0.00171216		216	ALDH1A1	-0.97333	0.00044797
2892	GRIA3	-1.0467	0.000698433		NA	AKR1C4	-0.975131	0.00912644
26873	OPLAH	-1.05207	7.253e-05		1290	COL5A2	-0.978839	6.87052e-05
586	BCAT1	-1.05622	9.87671e-05		2618	GART	-0.982266	3.62153e-05
255738	PCSK9	-1.06046	2.80082e-05		9406	ZRANB2	-0.985946	0.000625941
402	ARL2	-1.06103	0.00724645		26019	UPF2	-0.987201	2.15597e-06
4176	MCM7	-1.06196	0.00775285		92667	C20orf72	-0.99487	0.00488915
3856	KRT8	-1.06313	4.77422e-05		1786	DNMT1	-0.997897	0.000376574
84706	GPT2	-1.06315	9.90439e-07		5174	PDZK1	-1.00025	0.00127664
51557	LGSN	-1.06583	1.97167e-05		4176	MCM7	-1.00479	0.00792562
3856	KRT8	-1.066	1.16637e-06		6159	RPL29	-1.0067	0.000515778
3276	PRMT1	-1.08258	2.04389e-06		31	ACACA	-1.00683	0.000148511
130576	LYPD6B	-1.08843	3.49186e-06		5471	PPAT	-1.00941	0.00493229
2542	SLC37A4	-1.10744	0.000328618		1361	CPB2	-1.01241	0.000196872
595	CCND1	-1.11018	0.000313592		2984	GUCY2C	-1.01478	0.000902725
4171	MCM2	-1.11132	0.00483822		6159	RPL29	-1.01806	0.000400524
7104	TM4SF4	-1.11656	2.77474e-06		3276	PRMT1	-1.02091	1.47216e-05
10808	HSPH1	-1.11896	1.54199e-05		10606	PAICS	-1.02523	3.71198e-09
5646	PRSS3	-1.12054	0.00017821		2542	SLC37A4	-1.02531	0.000400524
3936	LCP1	-1.12527	0.000113051		595	CCND1	-1.0306	0.000371501
84171	LOXL4	-1.12652	0.00460856		2746	GLUD1	-1.03581	0.00036687
79711	IPO4	-1.12804	4.77422e-05		383	ARG1	-1.04347	0.00112141
10946	SF3A3	-1.13269	0.000181109		2182	ACSL4	-1.04484	3.93973e-05
55859	BEX1	-1.13421	0.00575191		39	ACAT2	-1.04793	0.00526514
3875	KRT18	-1.13729	0.00109422		54938	SARS2	-1.04948	1.11773e-06
2628	GATM	-1.13835	0.00322237		10763	NES	-1.05058	0.000349983
2984	GUCY2C	-1.14487	0.000472188		7104	TM4SF4	-1.05375	2.43288e-06
7106	TSPAN4	-1.15232	0.000141089		79814	AGMAT	-1.0566	0.000252829
5831	PYCR1	-1.15312	2.04389e-06		3276	PRMT1	-1.05987	1.11773e-06
706	TSPO	-1.15354	0.000899846		10797	MTHFD2	-1.06293	0.000205326
4830	NME1	-1.15411	3.24135e-06		55859	BEX1	-1.06799	0.00611531
3309	HSPA5	-1.15577	1.08303e-05		4128	MAOA	-1.0683	2.30071e-05
2762	GMDS	-1.15607	1.29564e-05		634	CEACAM1	-1.07364	0.00059225
220001	VWCE	-1.15882	0.00847362		728939	PDZK1	-1.08327	0.0053959
1361	CPB2	-1.16004	7.65668e-05		2560	GABRB1	-1.0853	4.57463e-05
4172	MCM3	-1.16829	0.00257817		4171	MCM2	-1.0855	0.00364726
552900	BOLA2	-1.17583	0.00401689		2584	GALK1	-1.08841	0.00137388
2584	GALK1	-1.18083	0.00108519		84706	GPT2	-1.10106	2.96439e-07
5050	PAFAH1B3	-1.18293	0.00171294		7052	TGM2	-1.10518	1.16478e-06
2224	FDPS	-1.18531	6.35593e-05		445	ASS1	-1.10811	0.000514226
432	ASGR1	-1.18628	0.00534601		7032	TFF2	-1.11203	0.00103524
23231	SEL1L3	-1.18794	6.78719e-05		23649	POLA2	-1.1149	0.00567484
56915	EXOSC5	-1.19719	3.48862e-07		284085	FLJ40504	-1.12881	0.00208632
2194	FASN	-1.19992	0.00125337		50814	NSDHL	-1.12999	1.84215e-05
5699	PSMB10	-1.20002	5.12802e-05		3898	LAD1	-1.13142	0.00017009
3990	LIPC	-1.20008	6.01985e-07		441282	AKR1B15	-1.13169	1.86966e-05
3958	LGALS3	-1.20404	0.000607056		114571	SLC22A9	-1.13205	3.43891e-05
54938	SARS2	-1.20822	3.48862e-07		10590	SCGN	-1.14478	0.000603577
10763	NES	-1.20965	0.000136379		31	ACACA	-1.17271	9.58689e-06
306	ANXA3	-1.22208	0.0104785		2762	GMDS	-1.17665	4.38112e-06
1361	CPB2	-1.22396	0.000113684		762	CA4	-1.17683	0.00254473
114571	SLC22A9	-1.23278	1.44438e-05		282969	C10orf125	-1.18219	1.81083e-05
10590	SCGN	-1.23772	0.000496518		51557	LGSN	-1.18314	2.0592e-06
3026	HABP2	-1.25135	0.000180145		283375	SLC39A5	-1.18314	9.7035e-05
6159	RPL29	-1.25268	6.92051e-05		3990	LIPC	-1.20779	2.58931e-07
94274	PPP1R14A	-1.26614	0.000737781		3309	HSPA5	-1.22211	2.0592e-06
284085	FLJ40504	-1.2701	0.00114259		NA	GRIA3	-1.22938	4.675e-05
4175	MCM6	-1.27149	0.00805513		8318	CDC45	-1.23013	0.002774
283375	SLC39A5	-1.27152	8.08798e-05		27329	ANGPTL3	-1.23202	0.00469367
7032	TFF2	-1.27223	0.00047065		8195	MKKS	-1.23208	0.000106212
445	ASS1	-1.29485	0.000168103		10808	HSPH1	-1.23879	1.58086e-06
3312	HSPA8	-1.29848	0.00557408		7103	TSPAN8	-1.23918	1.77712e-05
64073	C19orf33	-1.29882	0.00477569		3385	ICAM3	-1.24267	0.00358035
282969	C10orf125	-1.29955	1.11252e-05		6201	RPS7	-1.24281	5.64742e-06
7052	TGM2	-1.30532	2.7385e-07		4172	MCM3	-1.2444	0.000770859
1479	CSTF3	-1.30895	0.000152546		63924	CIDEC	-1.25116	0.00409708
6159	RPL29	-1.31744	4.30094e-05		3312	HSPA8	-1.2531	0.00430914
7103	TSPAN8	-1.31801	1.64481e-05		1361	CPB2	-1.25956	0.000895195
3898	LAD1	-1.32113	5.11118e-05		586	BCAT1	-1.26388	4.31346e-06
4172	MCM3	-1.3318	0.000261275		4172	MCM3	-1.27676	0.000216934
23649	POLA2	-1.33252	0.00178525		2224	FDPS	-1.27919	1.1107e-05
8195	MKKS	-1.33272	8.29234e-05		4597	MVD	-1.29242	8.1286e-07
NA	GRIA3	-1.3424	3.30983e-05		116843	C6orf192	-1.29622	0.000230264
8318	CDC45	-1.35873	0.00182347		114571	SLC22A9	-1.29697	2.95689e-06
634	CEACAM1	-1.36024	7.50945e-05		1361	CPB2	-1.32937	1.86966e-05
116843	C6orf192	-1.36521	0.000246922		6201	RPS7	-1.35637	6.04341e-07
7429	VIL1	-1.3819	6.19935e-07		1479	CSTF3	-1.35753	4.57463e-05
6201	RPS7	-1.43192	1.85402e-06		5831	PYCR1	-1.36282	1.04283e-07
4128	MAOA	-1.47667	5.95568e-07		3312	HSPA8	-1.36832	0.00206145
3304	HSPA1A	-1.51334	0.000743643		9415	FADS2	-1.36988	2.58931e-07
441282	AKR1B15	-1.54608	5.50998e-07		432	ASGR1	-1.40772	0.000560953
6201	RPS7	-1.56585	2.09928e-07		51316	PLAC8	-1.42951	5.12087e-07
2877	GPX2	-1.57972	0.0016016		51316	PLAC8	-1.44443	5.29614e-06
63924	CIDEC	-1.58845	0.000684764		2628	GATM	-1.45927	0.000127475
634	CEACAM1	-1.63203	9.42376e-07		2877	GPX2	-1.47203	0.00180202
3303	HSPA1A	-1.66584	9.52495e-06		7429	VIL1	-1.50381	1.04283e-07
51316	PLAC8	-1.73691	8.47698e-07		634	CEACAM1	-1.52164	1.11773e-06
3158	HMGCS2	-1.75158	0.00518579		7407	VARS	-1.527	1.94311e-06
7407	VARS	-1.75461	6.15484e-07		2194	FASN	-1.57239	2.55383e-05
10551	AGR2	-1.75536	1.13871e-05		255738	PCSK9	-1.57286	8.54137e-08
51316	PLAC8	-1.76231	8.45351e-08		10551	AGR2	-1.57555	2.13277e-05
762	CA4	-1.79821	4.24422e-05		3304	HSPA1A	-1.77763	5.67566e-05
57016	AKR1B10	-2.53261	2.2769e-07		3303	HSPA1A	-1.90321	6.04341e-07
57817	HAMP	-2.53942	0.00543479		57016	AKR1B10	-2.3331	2.96439e-07

## Sheet: 12hs - LOW
C vs. FFA 12hrs					C vs. 0.1 DOX 12hrs					C vs. FFA + 0.1 DOX 12hrs
Entrez ID	Gene Symbol	log fold	Adj.P value		Entrez ID	Gene Symbol	log fold	Adj.P value		Entrez ID	Gene Symbol	log fold	Adj.P value
57016	AKR1B10	2.64629	2.9101e-07		None					None
27329	ANGPTL3	1.73968	0.000469525
10551	AGR2	1.72442	3.50767e-05
7429	VIL1	1.68601	1.16086e-07
9415	FADS2	1.64577	1.16086e-07
255738	PCSK9	1.61687	2.12777e-07
4172	MCM3	1.61618	5.5464e-05
3303	HSPA1A	1.60054	3.78847e-05
2194	FASN	1.55394	0.000142645
114571	SLC22A9	1.54686	3.04552e-06
114571	SLC22A9	1.51932	2.15578e-06
2628	GATM	1.50352	0.000344325
441282	AKR1B15	1.49737	2.4612e-06
432	ASGR1	1.49021	0.00114046
283375	SLC39A5	1.48596	2.6341e-05
6201	RPS7	1.48492	1.28931e-06
8318	CDC45	1.48438	0.00143591
5831	PYCR1	1.48163	1.61373e-07
NA	GRIA3	1.46272	2.6341e-05
7407	VARS	1.451	2.30696e-05
55859	BEX1	1.45086	0.00103207
4597	MVD	1.44977	1.28931e-06
282969	C10orf125	1.41071	9.20498e-06
6201	RPS7	1.40601	5.90847e-06
2224	FDPS	1.40176	1.77661e-05
3304	HSPA1A	1.38538	0.00336636
51316	PLAC8	1.37479	5.38389e-05
4174	MCM5	1.36248	0.000731526
4172	MCM3	1.35505	0.00115267
634	CEACAM1	1.34535	3.58545e-05
3312	HSPA8	1.32478	0.00840955
7032	TFF2	1.30549	0.000684486
56915	EXOSC5	1.29378	2.96491e-07
51316	PLAC8	1.29322	1.3146e-05
8195	MKKS	1.28828	0.000249804
3276	PRMT1	1.28713	3.40867e-06
2892	GRIA3	1.28346	0.000137896
54938	SARS2	1.26187	5.70785e-07
762	CA4	1.25554	0.00441272
4171	MCM2	1.25159	0.00299142
220001	VWCE	1.24984	0.00810215
116843	C6orf192	1.24726	0.00132454
79814	AGMAT	1.2346	0.000163467
31	ACACA	1.23141	2.74106e-05
2542	SLC37A4	1.22998	0.000193898
7103	TSPAN8	1.21127	0.000109093
2984	GUCY2C	1.20972	0.000489001
6159	RPL29	1.20222	0.000263637
83959	SLC4A11	1.20113	0.00143591
51557	LGSN	1.20051	1.07354e-05
55723	ASF1B	1.20005	1.28981e-06
2762	GMDS	1.19972	1.88188e-05
3898	LAD1	1.18458	0.000385901
1479	CSTF3	1.18419	0.000947562
7351	UCP2	1.18199	8.04775e-05
5328	PLAU	1.17452	0.000150805
445	ASS1	1.17363	0.00103207
586	BCAT1	1.17168	6.04193e-05
3373	HYAL1	1.16812	1.69304e-05
383	ARG1	1.16724	0.00126118
100133941	DQ893812	1.16024	0.00069943
4640	MYO1A	1.15503	4.48896e-05
5507	PPP1R3C	1.1514	5.50098e-05
316	AOX1	1.14948	0.000454961
6720	SREBF1	1.14214	4.84894e-05
3026	HABP2	1.14199	0.0010109
3856	KRT8	1.14144	1.28981e-06
2892	GRIA3	1.13992	0.00015218
634	CEACAM1	1.13974	0.00115967
31	ACACA	1.13963	0.000140331
1361	CPB2	1.13613	0.000536556
2264	FGFR4	1.13523	1.37001e-05
3276	PRMT1	1.13415	2.83833e-06
39	ACAT2	1.13232	0.00771377
10590	SCGN	1.13201	0.00239613
5050	PAFAH1B3	1.12626	0.00504487
NA	ACY1	1.10957	0.000251362
2584	GALK1	1.1087	0.00378003
2560	GABRB1	1.10501	0.000163255
50814	NSDHL	1.10401	0.000115063
7301	TYRO3	1.10236	0.000867037
3309	HSPA5	1.10216	4.51809e-05
445	ASS1	1.09608	0.000140331
79711	IPO4	1.09471	0.00015053
1786	DNMT1	1.08979	0.000530341
26577	PCOLCE2	1.08347	1.7221e-05
84706	GPT2	1.08126	2.30762e-06
5646	PRSS3	1.07923	0.000538759
2746	GLUD1	1.068	0.000991507
6159	RPL29	1.06271	0.000947562
27018	NGFRAP1	1.06182	1.91141e-06
4922	NTS	1.05959	0.00357852
3992	FADS1	1.05394	2.84264e-05
10053	AP1M2	1.05389	1.28981e-06
56301	SLC7A10	1.05009	9.85179e-08
27131	SNX5	1.04883	0.000162334
1373	CPS1	1.04852	0.000503422
10763	NES	1.04262	0.00141041
6723	SRM	1.03675	4.2907e-06
56944	OLFML3	1.03435	0.000427862
5422	POLA1	1.03431	0.00119835
3990	LIPC	1.03249	1.37001e-05
23175	LPIN1	1.02883	0.000213685
84059	GPR98	1.02348	0.000459233
706	TSPO	1.02133	0.00541598
5444	PON1	1.0187	0.00171717
7052	TGM2	1.01869	2.24829e-05
5699	PSMB10	1.01635	0.000740723
113655	MFSD3	1.01357	0.00010789
10606	PAICS	1.00349	5.07998e-08
11000	SLC27A3	1.00187	2.37812e-05
10808	HSPH1	1.00128	0.000138164
10606	PAICS	0.988479	1.65218e-07
4678	NASP	0.986906	7.09257e-06
29925	GMPPB	0.985225	0.000294563
5174	PDZK1	0.985168	0.0048787
8558	CDK10	0.983317	7.71493e-05
55825	PECR	0.98268	4.51809e-05
79019	CENPM	0.978714	0.000136506
4830	NME1	0.976418	7.03037e-05
3856	KRT8	0.968163	3.50767e-05
1361	CPB2	0.963454	0.00128969
4128	MAOA	0.961508	0.000358343
8435	SOAT2	0.958953	0.0020182
57733	GBA3	0.95765	0.00895695
25902	MTHFD1L	0.951358	2.83833e-06
10205	MPZL2	0.951009	0.00058918
433	ASGR2	0.949383	6.03003e-06
3856	KRT8	0.948451	0.000387887
NA	BX110351	0.938355	1.59298e-05
1163	CKS1B	0.936233	5.4728e-06
7264	TSTA3	0.935213	0.000973206
2618	GART	0.934129	0.000287699
9768	KIAA0101	0.931145	0.00031121
79228	THOC6	0.930472	4.7358e-07
30833	NT5C	0.928053	0.00136866
1163	CKS1B	0.925574	6.23388e-05
NA	RANBP1	0.923002	1.15179e-05
26472	PPP1R14B	0.916304	0.000140331
2264	FGFR4	0.915114	3.21734e-06
7106	TSPAN4	0.913644	0.00330312
26019	UPF2	0.912386	3.67456e-05
118881	COMTD1	0.901086	1.28596e-05
1910	EDNRB	0.898133	0.000207431
7866	IFRD2	0.898081	4.12826e-05
5649	RELN	0.894425	8.57224e-06
29925	GMPPB	0.891497	0.000609493
595	CCND1	0.889571	0.00566962
8463	TEAD2	0.885093	0.000234971
3990	LIPC	0.878936	3.97166e-05
2810	SFN	0.877846	0.00012372
2653	GCSH	0.874991	0.000195344
54997	TESC	0.874449	9.40469e-05
216	ALDH1A1	0.872052	0.00990753
9406	ZRANB2	0.871718	0.00695845
54961	SSH3	0.868342	0.00330234
64847	SPATA20	0.866545	0.00143591
5902	RANBP1	0.864572	1.44771e-05
57418	WDR18	0.864287	0.000159078
5595	MAPK3	0.862719	0.00217509
1503	CTPS	0.862306	0.000374206
7104	TM4SF4	0.859264	0.000177232
1806	DPYD	0.85589	0.00746476
3547	IGSF1	0.85471	0.000388206
23231	SEL1L3	0.854061	0.00478139
26873	OPLAH	0.852444	0.00156548
10327	AKR1A1	0.85232	0.000130706
79017	GGCT	0.847506	0.00144718
27077	B9D1	0.846978	0.000234971
55859	BEX1	0.845462	0.000156485
949	UBC	0.845374	0.000961616
6627	SNRPA1	0.842565	0.00881693
1290	COL5A2	0.840021	0.00150538
84899	TMTC4	0.839417	3.53294e-05
27077	B9D1	0.836848	0.000103851
1854	DUT	0.836774	4.90764e-05
63910	SLC17A9	0.835638	0.00270827
1644	DDC	0.832881	0.000432956
79003	MIS12	0.832839	0.00625612
348093	RBPMS2	0.8292	0.0100618
130013	ACMSD	0.8284	0.000907789
29974	A1CF	0.82397	1.68454e-05
56339	METTL3	0.823561	0.00117574
10947	AP3M2	0.823285	1.79378e-07
26472	PPP1R14B	0.819792	0.00189431
130576	LYPD6B	0.819135	0.000281804
1890	TYMP	0.818993	0.00774823
8435	SOAT2	0.812871	0.00414701
10263	CDK2AP2	0.811435	0.000350066
57820	CCNB1IP1	0.811278	0.000291746
6229	RPS24	0.809471	6.56981e-05
2593	GAMT	0.805096	0.00199757
4815	NINJ2	0.803781	0.00117574
5976	UPF1	0.799092	0.000287699
2593	GAMT	0.798177	0.00479288
57706	DENND1A	0.79738	0.000896504
7936	RDBP	0.796064	0.000411158
3315	HSPB1	0.791729	0.00881489
1468	SLC25A10	0.789976	0.000146398
9277	WDR46	0.789857	0.00010747
79017	GGCT	0.787185	1.69001e-05
4015	LOX	0.787156	0.000390331
79019	CENPM	0.786525	0.00147763
5570	PKIB	0.785935	0.00533665
84513	PPAPDC1B	0.782676	2.07241e-06
2582	GALE	0.781331	0.00173317
3068	HDGF	0.780797	2.3842e-05
2882	GPX7	0.780033	0.00311146
55540	IL17RB	0.777909	0.00353982
5832	ALDH18A1	0.776915	5.86047e-05
4832	NME3	0.776788	0.0042675
28969	BZW2	0.775287	2.62671e-05
5591	PRKDC	0.773568	2.11053e-05
3182	HNRNPAB	0.770036	1.69001e-05
55920	RCC2	0.769695	0.00016271
56952	PRTFDC1	0.76958	0.000374206
50865	HEBP1	0.769417	0.000100798
51557	LGSN	0.768759	8.99275e-05
440585	FAM183A	0.768355	0.00132918
119559	SFXN4	0.768003	5.59476e-05
9497	SLC4A7	0.766636	0.00754572
10205	MPZL2	0.766028	0.00466638
9543	IGDCC3	0.765774	0.000220577
2202	EFEMP1	0.763376	0.00843131
11284	PNKP	0.76289	0.000170587
4522	MTHFD1	0.76278	4.42365e-05
400916	CHCHD10	0.756592	0.0101702
7169	TPM2	0.756342	0.000312847
7169	TPM2	0.754613	0.00634526
NA	RPL36A	0.751028	0.00862285
28976	ACAD9	0.748651	0.000170368
4860	PNP	0.748382	0.000162334
5236	PGM1	0.745583	0.000780462
2786	GNG4	0.742668	0.00426323
39	ACAT2	0.742287	9.29848e-05
5833	PCYT2	0.740028	0.000370632
3698	ITIH2	0.739207	0.0024113
51668	HSPB11	0.736853	0.00217509
4547	MTTP	0.73331	0.0033141
10162	LPCAT3	0.731666	0.00659701
166	AES	0.731632	0.00414012
10797	MTHFD2	0.730209	3.22244e-05
54498	SMOX	0.728739	0.0102953
2242	FES	0.727953	0.000669934
65003	MRPL11	0.727773	0.00242298
1152	CKB	0.72761	0.00389656
908	CCT6A	0.725854	8.80869e-05
10131	TRAP1	0.725497	7.13579e-05
11015	KDELR3	0.725426	0.0031047
22948	CCT5	0.724928	0.00015623
6697	SPR	0.719343	0.000201587
23306	TMEM194A	0.715906	3.97166e-05
4047	LSS	0.714768	0.000172146
192666	KRT24	0.713042	0.00131349
196483	FAM86A	0.7125	2.04105e-06
29881	NPC1L1	0.712043	0.000186413
6476	SI	0.711897	0.00216884
23590	PDSS1	0.711835	0.00175639
7867	MAPKAPK3	0.711451	0.000953524
55748	CNDP2	0.710284	4.02815e-05
4552	MTRR	0.710025	0.000163467
1460	CSNK2B	0.709077	1.43959e-06
79075	DSCC1	0.708709	0.00144718
115749	C12orf56	0.708643	0.00298974
100885850	AARSD1	0.707514	0.000571437
8153	RND2	0.707431	0.00554697
115827	RAB3C	0.704904	0.00526652
10049	DNAJB6	0.702103	0.00276677
275	AMT	0.701503	0.00136864
11243	PMF1	0.700076	0.0015824
433	ASGR2	0.699369	0.000459233
132158	GLYCTK	0.698805	0.000430849
2027	ENO3	0.698319	9.78649e-05
55755	CDK5RAP2	0.697541	0.00216385
6319	SCD	0.693495	3.97385e-05
8842	PROM1	0.693384	0.00578359
100101266	LOC100101266	0.689356	8.34252e-05
79783	C7orf10	0.686838	0.000150805
23306	TMEM194A	0.684082	0.00136126
4050	LTB	0.682432	0.00748187
1528	CYB5A	0.681283	0.00503305
119559	SFXN4	0.68108	0.00192213
29974	A1CF	0.680668	0.000183885
6319	SCD	0.67919	0.00143505
4830	NME1	0.674326	0.000254679
80144	FRAS1	0.674004	0.00427305
64757	MOSC1	0.669543	0.0103607
79071	ELOVL6	0.669063	3.15772e-06
2171	FABP5	0.668871	0.000170368
11015	KDELR3	0.667687	2.6341e-05
5424	POLD1	0.6647	0.00166883
8991	SELENBP1	0.664355	0.00296402
4927	NUP88	0.658917	0.00822241
4669	NAGLU	0.657779	0.00152614
10400	PEMT	0.652123	0.0100935
166	AES	0.651408	0.00855173
55245	UQCC	0.650974	0.000947562
527	ATP6V0C	-0.651602	0.00547666
9117	SEC22C	-0.651724	5.90488e-05
NA	FAM47E-STBD1	-0.65286	0.00142751
144363	LYRM5	-0.654715	0.000104927
222389	BEND7	-0.654736	0.00498401
84248	FYTTD1	-0.655401	0.00299142
116987	AGAP1	-0.656087	0.00264908
339122	RAB43	-0.656555	2.94122e-05
55233	MOBKL1B	-0.658144	0.00195907
901	CCNG2	-0.659398	0.00649652
55508	SLC35E3	-0.660162	0.00011924
7013	TERF1	-0.660875	0.00181891
8634	RTCD1	-0.661093	0.00110918
5728	PTEN	-0.661718	0.010154
3280	HES1	-0.66209	0.00728534
150465	TTL	-0.662358	0.00208273
5412	UBL3	-0.662476	0.00130892
58487	CREBZF	-0.662789	0.000249066
54838	C10orf26	-0.664302	0.000306202
57522	SRGAP1	-0.665006	0.00620672
10049	DNAJB6	-0.665123	0.000266
5594	MAPK1	-0.668889	0.00043833
56262	LRRC8A	-0.669151	0.00556873
4320	MMP11	-0.669986	3.97385e-05
100009676	LOC100009676	-0.670479	0.000838912
27314	RAB30	-0.671063	0.000401637
159013	CXorf38	-0.674095	0.000500166
5194	PEX13	-0.676254	0.00746703
54680	ZNHIT6	-0.676808	0.00652701
205564	SENP5	-0.677091	8.18076e-05
3151	HMGN2	-0.677982	0.00223375
84647	PLA2G12B	-0.680307	0.00910231
440270	GOLGA8B	-0.681007	0.00798674
7328	UBE2H	-0.681155	0.00366468
255758	TM4SF19	-0.682395	0.00285587
64795	RMND5A	-0.683746	1.35469e-06
NA	BC038747	-0.684056	5.86047e-05
8660	IRS2	-0.685818	0.0013778
253152	EPHX4	-0.687288	0.000722525
7584	ZNF35	-0.687727	0.00461217
51228	GLTP	-0.688096	0.000907789
8634	RTCD1	-0.688755	0.000722525
664	BNIP3	-0.68905	0.000722525
143686	SESN3	-0.691096	0.000323542
4929	NR4A2	-0.693755	0.000354843
7681	MKRN3	-0.69429	6.04193e-05
22853	LMTK2	-0.694569	0.00011924
1655	DDX5	-0.694833	0.000271245
10670	RRAGA	-0.695795	0.00261779
55765	C1orf106	-0.696537	0.0051938
6651	SON	-0.698896	0.00547666
54842	MFSD6	-0.69982	0.000144642
58528	RRAGD	-0.700062	0.000281804
54805	CNNM2	-0.700268	0.000115991
9960	USP3	-0.703185	0.00585009
27086	FOXP1	-0.704496	0.000672654
90141	EFCAB11	-0.705683	0.00322702
285368	PRRT3	-0.706869	0.00149967
79786	KLHL36	-0.709018	5.9578e-05
60343	FAM3A	-0.709835	0.000484439
8895	CPNE3	-0.711396	0.00293143
55831	TMEM111	-0.712463	8.04775e-05
84310	C7orf50	-0.713273	9.97653e-05
11345	GABARAPL2	-0.715559	5.4728e-06
10435	CDC42EP2	-0.717416	1.3335e-05
8799	PEX11B	-0.718224	0.000263637
112936	VPS26B	-0.718516	0.00324913
27102	EIF2AK1	-0.718687	0.000129841
5900	RALGDS	-0.71909	0.00161701
4097	MAFG	-0.719123	0.00151738
22903	BTBD3	-0.719642	0.00578359
9896	FIG4	-0.722876	0.00824473
135114	HINT3	-0.723807	0.00330775
9266	CYTH2	-0.726129	0.00835456
26262	TSPAN17	-0.726974	0.00500955
3181	HNRNPA2B1	-0.728227	0.000251362
400027	LOC400027	-0.73195	3.88054e-05
57570	TRMT5	-0.733306	0.000331236
7328	UBE2H	-0.733443	0.00100553
221	ALDH3B1	-0.733697	0.00788643
80176	SPSB1	-0.737108	0.00586042
57568	SIPA1L2	-0.73805	0.00056394
90410	IFT20	-0.739339	0.00410957
79665	DHX40	-0.739569	0.0012485
80325	ABTB1	-0.73973	0.00164143
359948	IRF2BP2	-0.740819	0.00810215
7072	TIA1	-0.741411	0.0015824
60436	TGIF2	-0.742036	0.00448868
490	ATP2B1	-0.742348	0.0025112
140460	ASB7	-0.744768	1.38936e-06
81689	ISCA1	-0.74662	0.000240742
100272147	MTCP1NB	-0.749209	0.000218953
221079	ARL5B	-0.754517	0.000104927
22936	ELL2	-0.756571	0.00498314
83861	RSPH3	-0.757438	1.28981e-06
25	ABL1	-0.759422	8.86038e-09
25798	BRI3	-0.765828	0.000119874
7328	UBE2H	-0.767574	0.00239613
868	CBLB	-0.769675	0.000530341
55640	FLVCR2	-0.770296	0.000106117
23457	ABCB9	-0.776358	0.00010789
3964	LGALS8	-0.777131	0.00506691
81689	ISCA1	-0.779488	3.15772e-06
118433	RPL23AP7	-0.782974	0.00185652
5533	PPP3CC	-0.788724	0.000882013
11258	DCTN3	-0.791526	0.00256758
5937	RBMS1	-0.79344	0.00503305
22920	KIFAP3	-0.793768	0.00318478
8545	CGGBP1	-0.796171	6.52212e-05
3985	LIMK2	-0.797149	0.00217856
81889	FAHD1	-0.797549	0.00135988
116236	ABHD15	-0.797663	0.000621216
113263	GLCCI1	-0.802796	0.00326821
80148	PQLC1	-0.802948	0.00289067
26018	LRIG1	-0.804913	0.00012344
54602	NDFIP2	-0.805915	0.00242298
146691	TOM1L2	-0.80656	0.000240039
80824	DUSP16	-0.807644	5.38389e-05
NA	CHN2	-0.811902	0.00315762
80204	FBXO11	-0.81363	0.0080188
857	CAV1	-0.813843	9.10789e-05
23582	CCNDBP1	-0.819668	0.000166218
196	AHR	-0.821757	3.67456e-05
51128	SAR1B	-0.821983	0.000480462
64121	RRAGC	-0.822449	6.75863e-05
9419	CRIPT	-0.824235	6.62216e-06
440	ASNS	-0.826568	0.0038399
1999	ELF3	-0.828042	0.000470487
NA	DGCR6L	-0.828969	0.00817366
8970	HIST1H2BJ	-0.830305	0.00286551
84196	USP48	-0.831193	0.00613086
161742	SPRED1	-0.832417	0.00143591
9371	KIF3B	-0.8335	0.000214024
22926	ATF6	-0.835911	0.000152528
115123	March3	-0.837725	0.00064556
55069	C7orf42	-0.842947	2.17763e-05
23048	FNBP1	-0.843498	0.00275407
2243	FGA	-0.843859	0.00779318
10381	TUBB3	-0.844616	0.0025533
9584	RBM39	-0.846516	0.00695664
6772	STAT1	-0.850525	0.00318478
2768	GNA12	-0.851075	0.00010789
90355	C5orf30	-0.856552	0.00728038
135112	NCOA7	-0.862841	0.00816301
747	DAGLA	-0.864302	0.00307843
84925	DIRC2	-0.865469	0.00350905
8473	OGT	-0.866956	0.000159078
51706	CYB5R1	-0.87001	0.00845778
2110	ETFDH	-0.870376	0.00103207
10253	SPRY2	-0.871498	0.00409035
645676	LOC645676	-0.872667	2.07241e-06
8767	RIPK2	-0.872744	0.00270849
NA	ZBTB7B	-0.872944	3.15772e-06
8971	H1FX	-0.874711	0.00450911
84058	WDR54	-0.88228	0.0016073
8843	GPR109B	-0.883739	0.000500408
55207	ARL8B	-0.884948	0.000295772
23764	MAFF	-0.885698	0.00246097
10492	SYNCRIP	-0.886324	0.00143591
140735	DYNLL2	-0.887148	0.00398519
63027	SLC22A23	-0.887518	0.0066866
9232	PTTG1	-0.888529	0.00130227
122786	FRMD6	-0.888921	0.00659701
3484	IGFBP1	-0.891749	0.00114175
166815	TIGD2	-0.893895	0.00314483
26190	FBXW2	-0.895821	1.69304e-05
8760	CDS2	-0.899686	7.80747e-05
55504	TNFRSF19	-0.901105	0.000923172
79134	TMEM185B	-0.902367	0.00143591
10161	LPAR6	-0.907164	0.000237774
115123	March3	-0.90771	0.00140546
84918	LRP11	-0.909099	0.00347508
79960	PHF17	-0.912518	0.000876041
26061	HACL1	-0.915869	1.88188e-05
84858	ZNF503	-0.920269	1.10126e-06
79616	CCNJL	-0.921968	0.00601939
90231	KIAA2013	-0.927798	7.79397e-05
130814	PQLC3	-0.930749	0.00319118
2932	GSK3B	-0.931326	0.0025229
83641	FAM107B	-0.931872	0.00296494
10672	GNA13	-0.93637	0.000249066
9249	DHRS3	-0.938179	2.87124e-06
NA	AF385432	-0.9465	0.00192068
90231	KIAA2013	-0.946872	2.54679e-05
51669	TMEM66	-0.948845	0.000115991
9267	CYTH1	-0.948909	0.00131098
23204	ARL6IP1	-0.95041	0.00311048
2261	FGFR3	-0.961711	0.00456405
1601	DAB2	-0.965968	0.000234194
1609	DGKQ	-0.969109	0.000187955
7088	TLE1	-0.970116	0.0098725
80255	SLC35F5	-0.971171	0.00242486
5147	PDE6D	-0.972583	0.000101771
64327	LMBR1	-0.982467	0.000222887
9182	RASSF9	-0.991704	0.000266
133	ADM	-0.992556	0.000120262
3099	HK2	-0.996566	0.000964417
3017	HIST1H2BD	-0.997603	0.00432703
8445	DYRK2	-0.998686	0.0029696
30061	SLC40A1	-1.00278	0.000538131
138151	NACC2	-1.00344	2.79174e-06
4048	LTA4H	-1.00456	0.000179261
10505	SEMA4F	-1.01067	0.00219556
5594	MAPK1	-1.01709	0.000228516
59343	SENP2	-1.02424	0.000429236
7259	DSE	-1.02499	1.81974e-05
221079	ARL5B	-1.02574	1.16086e-07
94241	TP53INP1	-1.03046	0.000249066
59343	SENP2	-1.03078	4.02118e-05
4790	NFKB1	-1.03096	0.000782302
90427	BMF	-1.04085	0.000115991
124491	TMEM170A	-1.04121	4.02118e-05
26234	FBXL5	-1.0423	0.000907709
84962	JUB	-1.04959	4.8194e-05
9846	GAB2	-1.0506	2.10945e-05
5887	RAD23B	-1.05154	5.90847e-06
51111	SUV420H1	-1.05381	2.67012e-07
85441	PRIC285	-1.05834	5.63653e-05
26262	TSPAN17	-1.05932	6.23388e-05
10137	CPNE1	-1.0602	0.000150805
6446	SGK1	-1.06126	0.00782289
9232	PTTG1	-1.06144	9.40469e-05
1453	CSNK1D	-1.0632	9.40469e-05
1525	CXADR	-1.06747	3.09189e-05
85236	HIST1H2BK	-1.07616	0.00334335
652	BMP4	-1.07813	3.22244e-05
23677	SH3BP4	-1.08803	0.000136506
8848	TSC22D1	-1.09866	0.00954172
50650	ARHGEF3	-1.10138	0.0044258
221833	SP8	-1.10557	0.00691805
3964	LGALS8	-1.10643	0.00023752
3093	UBE2K	-1.10729	0.000538759
6431	SRSF6	-1.11441	0.0102104
84265	POLR3GL	-1.11602	4.24908e-06
151613	TTC14	-1.11774	0.000345848
26255	PTTG3	-1.11795	9.73527e-05
8555	CDC14B	-1.11983	1.4215e-07
65258	MPPE1	-1.1236	9.27583e-07
29094	HSPC159	-1.13667	0.000218953
NA	LOC100129186	-1.14271	6.42577e-05
80139	ZNF703	-1.14758	4.02118e-05
7855	FZD5	-1.15058	0.000909879
151613	TTC14	-1.16775	0.000501769
23568	ARL2BP	-1.17671	4.77479e-06
90427	BMF	-1.1812	0.000186413
10468	FST	-1.18678	0.00162543
10608	MXD4	-1.18847	0.000686431
726	CAPN5	-1.19223	0.000394931
8835	SOCS2	-1.20001	0.00166145
493812	HCG11	-1.21306	1.7804e-05
51092	SIDT2	-1.22149	0.00424932
8654	PDE5A	-1.22218	5.07998e-08
115123	March3	-1.22366	2.37812e-05
94241	TP53INP1	-1.23091	0.000163467
8424	BBOX1	-1.2385	1.28981e-06
7538	ZFP36	-1.24111	0.00259132
152007	GLIPR2	-1.2422	0.00139835
23457	ABCB9	-1.24295	1.27479e-05
195827	C9orf21	-1.24855	0.00121234
57132	CHMP1B	-1.25817	9.47679e-06
201164	PLD6	-1.26922	0.000332207
55603	FAM46A	-1.27027	0.000260388
23095	KIF1B	-1.27193	0.00143607
1848	DUSP6	-1.27471	0.006617
2872	MKNK2	-1.27634	0.000217007
678	ZFP36L2	-1.27674	0.00549455
56892	C8orf4	-1.28246	0.00242524
2920	CXCL2	-1.3035	6.52212e-05
8334	HIST1H2AC	-1.30392	0.00151154
10252	SPRY1	-1.30822	0.00286551
3017	HIST1H2BD	-1.32374	0.000867037
2296	FOXC1	-1.32762	0.00492542
51619	UBE2D4	-1.33549	0.000877483
338758	LOC338758	-1.34115	0.00307959
10672	GNA13	-1.35383	0.000418284
344838	PAQR9	-1.37731	0.00158845
375061	FAM89A	-1.38749	4.02118e-05
23645	PPP1R15A	-1.39397	1.27479e-05
10221	TRIB1	-1.43681	0.003446
NA	TLE4	-1.43862	1.16086e-07
55500	ETNK1	-1.44735	8.34252e-05
27242	TNFRSF21	-1.45148	5.08053e-06
55339	WDR33	-1.45554	3.90664e-06
2861	GPR37	-1.45774	5.68325e-06
1316	KLF6	-1.46035	0.00340003
3491	CYR61	-1.50544	0.00866738
375061	FAM89A	-1.52203	6.04193e-05
55281	TMEM140	-1.55858	1.28931e-06
4609	MYC	-1.58546	0.000138164
10137	CPNE1	-1.598	2.70464e-06
1847	DUSP5	-1.60229	0.000586395
7779	SLC30A1	-1.62788	3.22244e-05
375061	FAM89A	-1.63384	7.78791e-06
2150	F2RL1	-1.65406	1.28931e-06
1316	KLF6	-1.66582	0.00191724
7057	THBS1	-1.69072	0.000349744
NA	AK055561	-1.73815	7.5533e-08
1958	EGR1	-1.754	1.71229e-05
6430	SRSF5	-1.79433	3.15772e-06
4609	MYC	-1.80395	0.000538759
2353	FOS	-1.81697	2.39986e-07
1843	DUSP1	-1.8192	1.27479e-05
7779	SLC30A1	-1.86175	7.09257e-06
6430	SRSF5	-1.91694	2.25153e-07
1848	DUSP6	-1.94336	1.51757e-05
4494	MT1F	-2.05025	0.00492128
1543	CYP1A1	-2.08543	0.00186217
1906	EDN1	-2.13232	5.4728e-06
4496	MT1H	-2.17486	0.00635099
55500	ETNK1	-2.27349	2.74248e-08
NA	MT1JP	-2.45374	0.000163467
4502	MT2A	-2.57345	0.000327067
22822	PHLDA1	-2.59047	1.44771e-05
9518	GDF15	-2.64092	0.000349006
4489	MT1A	-3.09514	9.34355e-05
4495	MT1G	-3.47938	0.000397647
4501	MT1X	-3.72653	1.54482e-05
4493	MT1E	-3.79847	5.19414e-06

## Sheet: 12hs - HIGH
C vs. FFA 12hrs					C vs. 3.6 DOX 12hrs					C vs. FFA+ 3.6DOX 12hrs
Entrez ID	Gene Symbol	log fold	Adj.P value		Entrez ID	Gene Symbol	log fold	Adj.P value		Entrez	Gene Symbol	log fold	Adj.P value
57016	AKR1B10	2.64629	2.9101e-07		57016	AKR1B10	2.59013	3.45614e-07		1843	DUSP1	3.89814	1.00514e-06
27329	ANGPTL3	1.73968	0.000469525		57817	HAMP	2.56756	0.00690612		25976	TIPARP	3.8574	2.65156e-06
10551	AGR2	1.72442	3.50767e-05		3158	HMGCS2	2.13136	0.00112706		9246	UBE2L6	3.08844	2.99541e-05
7429	VIL1	1.68601	1.16086e-07		10551	AGR2	1.91791	6.85942e-06		8553	BHLHE40	2.89043	0.00114253
9415	FADS2	1.64577	1.16086e-07		55859	BEX1	1.68759	0.00013941		4091	SMAD6	2.80902	4.14071e-05
255738	PCSK9	1.61687	2.12777e-07		2194	FASN	1.67389	4.53067e-05		221079	ARL5B	2.58893	0.000164166
4172	MCM3	1.61618	5.5464e-05		9415	FADS2	1.6654	1.21097e-07		51092	SIDT2	2.55941	6.84799e-05
3303	HSPA1A	1.60054	3.78847e-05		NA	GRIA3	1.61577	6.04792e-06		27338	UBE2S	2.22948	0.000179788
2194	FASN	1.55394	0.000142645		51316	PLAC8	1.60719	6.04792e-06		10946	SF3A3	2.0293	9.69561e-05
114571	SLC22A9	1.54686	3.04552e-06		634	CEACAM1	1.59654	2.75433e-06		4495	MT1G	1.97876	3.79591e-08
114571	SLC22A9	1.51932	2.15578e-06		114571	SLC22A9	1.59223	8.57246e-07		3576	IL8	1.88337	4.70972e-07
2628	GATM	1.50352	0.000344325		114571	SLC22A9	1.58733	1.67672e-06		25852	ARMC8	1.86404	0.00485184
441282	AKR1B15	1.49737	2.4612e-06		283375	SLC39A5	1.55051	1.08233e-05		4501	MT1X	1.85516	8.97013e-09
432	ASGR1	1.49021	0.00114046		27329	ANGPTL3	1.54355	0.0012932		6430	SRSF5	1.84282	1.06839e-07
283375	SLC39A5	1.48596	2.6341e-05		255738	PCSK9	1.53583	3.54027e-07		5266	PI3	1.82221	0.000121462
6201	RPS7	1.48492	1.28931e-06		4597	MVD	1.52694	4.03405e-07		1870	E2F2	1.77846	0.000374152
8318	CDC45	1.48438	0.00143591		432	ASGR1	1.50648	0.00075331		7103	TSPAN8	1.77655	1.78831e-05
5831	PYCR1	1.48163	1.61373e-07		63924	CIDEC	1.49456	0.00181159		1316	KLF6	1.75498	1.07513e-07
NA	GRIA3	1.46272	2.6341e-05		7407	VARS	1.49411	1.1014e-05		56301	SLC7A10	1.71891	0.000356396
7407	VARS	1.451	2.30696e-05		6201	RPS7	1.474	9.57476e-07		5646	PRSS3	1.70286	2.41521e-05
55859	BEX1	1.45086	0.00103207		7429	VIL1	1.47043	6.21012e-07		2194	FASN	1.69876	7.98565e-06
4597	MVD	1.44977	1.28931e-06		441282	AKR1B15	1.46013	2.57489e-06		6159	RPL29	1.64525	1.13603e-05
282969	C10orf125	1.41071	9.20498e-06		3303	HSPA1A	1.45243	8.98719e-05		54938	SARS2	1.62914	8.13046e-06
6201	RPS7	1.40601	5.90847e-06		634	CEACAM1	1.43324	6.45824e-05		3936	LCP1	1.6148	4.89986e-05
2224	FDPS	1.40176	1.77661e-05		282969	C10orf125	1.42629	6.43131e-06		5728	PTEN	1.57711	0.00451189
3304	HSPA1A	1.38538	0.00336636		3304	HSPA1A	1.42076	0.00200715		5427	POLE2	1.56656	0.00260315
51316	PLAC8	1.37479	5.38389e-05		445	ASS1	1.41775	9.21645e-05		64073	C19orf33	1.5556	1.71205e-05
4174	MCM5	1.36248	0.000731526		51557	LGSN	1.41699	8.57246e-07		262	AMD1	1.54617	0.000269978
4172	MCM3	1.35505	0.00115267		7032	TFF2	1.41491	0.000204717		7429	VIL1	1.54162	6.97208e-07
634	CEACAM1	1.34535	3.58545e-05		3026	HABP2	1.41011	6.89127e-05		55339	WDR33	1.52826	3.36177e-06
3312	HSPA8	1.32478	0.00840955		2892	GRIA3	1.39654	3.68691e-05		634	CEACAM1	1.52576	4.31211e-07
7032	TFF2	1.30549	0.000684486		5831	PYCR1	1.39291	3.44475e-07		3930	LBR	1.51616	3.84624e-05
56915	EXOSC5	1.29378	2.96491e-07		51316	PLAC8	1.38931	3.8458e-06		10449	ACAA2	1.47125	0.00151008
51316	PLAC8	1.29322	1.3146e-05		2877	GPX2	1.35239	0.00918332		55038	CDCA4	1.462	0.000681737
8195	MKKS	1.28828	0.000249804		220001	VWCE	1.35097	0.00309801		54816	ZNF280D	1.44873	0.000320533
3276	PRMT1	1.28713	3.40867e-06		2224	FDPS	1.35041	2.1443e-05		27077	B9D1	1.43765	0.000856364
2892	GRIA3	1.28346	0.000137896		2628	GATM	1.34005	0.000931145		NA	BOLA2B	1.43339	0.000129409
54938	SARS2	1.26187	5.70785e-07		4172	MCM3	1.33659	0.00036664		7050	TGIF1	1.42336	2.21499e-05
762	CA4	1.25554	0.00441272		4640	MYO1A	1.31592	6.85942e-06		27131	SNX5	1.41329	6.37956e-05
4171	MCM2	1.25159	0.00299142		6201	RPS7	1.31119	1.1014e-05		84706	GPT2	1.38704	0.000430869
220001	VWCE	1.24984	0.00810215		5050	PAFAH1B3	1.30351	0.000912688		155370	SBDSP	1.38592	0.00853575
116843	C6orf192	1.24726	0.00132454		383	ARG1	1.26869	0.000373826		51619	UBE2D4	1.37426	6.02504e-06
79814	AGMAT	1.2346	0.000163467		10590	SCGN	1.2507	0.000654642		NA	MT1JP	1.37228	5.64679e-08
31	ACACA	1.23141	2.74106e-05		7351	UCP2	1.24559	3.04073e-05		4128	MAOA	1.37154	7.7635e-07
2542	SLC37A4	1.22998	0.000193898		116843	C6orf192	1.24199	0.00102825		NA	NBPF14	1.36946	5.50226e-05
7103	TSPAN8	1.21127	0.000109093		NA	ACY1	1.22698	6.17867e-05		85236	HIST1H2BK	1.36773	2.559e-06
2984	GUCY2C	1.20972	0.000489001		2542	SLC37A4	1.22189	0.000158433		6201	RPS7	1.35681	1.05352e-06
6159	RPL29	1.20222	0.000263637		7052	TGM2	1.20768	1.72411e-06		3547	IGSF1	1.35604	0.00074129
83959	SLC4A11	1.20113	0.00143591		1361	CPB2	1.20727	0.000203781		113130	CDCA5	1.34784	0.000326863
51557	LGSN	1.20051	1.07354e-05		3373	HYAL1	1.20645	8.61693e-06		57678	GPAM	1.34381	0.000310947
55723	ASF1B	1.20005	1.28981e-06		2984	GUCY2C	1.20623	0.000379322		5507	PPP1R3C	1.33974	0.000186276
2762	GMDS	1.19972	1.88188e-05		445	ASS1	1.20576	3.3049e-05		64121	RRAGC	1.33821	0.00144774
3898	LAD1	1.18458	0.000385901		56241	SUSD2	1.2049	0.00141516		7057	THBS1	1.33609	1.36282e-06
1479	CSTF3	1.18419	0.000947562		56915	EXOSC5	1.20404	7.93555e-07		6209	RPS15	1.32688	0.000657595
7351	UCP2	1.18199	8.04775e-05		2892	GRIA3	1.19894	6.45824e-05		7106	TSPAN4	1.30519	2.00241e-05
5328	PLAU	1.17452	0.000150805		4128	MAOA	1.19699	2.06794e-05		54498	SMOX	1.30416	0.00115507
445	ASS1	1.17363	0.00103207		7103	TSPAN8	1.19593	9.40873e-05		10161	LPAR6	1.30261	4.56448e-05
586	BCAT1	1.17168	6.04193e-05		3309	HSPA5	1.19362	1.20073e-05		722	C4BPA	1.29498	0.000341501
3373	HYAL1	1.16812	1.69304e-05		8195	MKKS	1.19003	0.000465809		1373	CPS1	1.26978	3.23822e-05
383	ARG1	1.16724	0.00126118		4172	MCM3	1.18953	0.00309801		25945	PVRL3	1.26553	0.0010638
100133941	DQ893812	1.16024	0.00069943		316	AOX1	1.17641	0.000268513		284085	FLJ40504	1.25917	2.88953e-05
4640	MYO1A	1.15503	4.48896e-05		1373	CPS1	1.17155	0.00011043		1601	DAB2	1.25842	0.00823771
5507	PPP1R3C	1.1514	5.50098e-05		54938	SARS2	1.16834	1.19452e-06		3930	LBR	1.2578	0.000143804
316	AOX1	1.14948	0.000454961		26019	UPF2	1.16492	1.08208e-06		3880	KRT19	1.25234	0.000238436
6720	SREBF1	1.14214	4.84894e-05		6159	RPL29	1.16264	0.00029804		51316	PLAC8	1.24248	1.05352e-06
3026	HABP2	1.14199	0.0010109		5699	PSMB10	1.15918	0.000123947		1316	KLF6	1.24037	1.76986e-07
3856	KRT8	1.14144	1.28981e-06		2264	FGFR4	1.15804	7.9593e-06		63924	CIDEC	1.23608	3.85466e-07
2892	GRIA3	1.13992	0.00015218		2938	GSTA1	1.15241	0.00710888		4640	MYO1A	1.23114	1.08989e-05
634	CEACAM1	1.13974	0.00115967		3276	PRMT1	1.1493	1.76031e-06		NA	SLX1B-SULT1A4	1.20797	0.00912981
31	ACACA	1.13963	0.000140331		2	A2M	1.14687	0.00812212		222389	BEND7	1.20485	0.00409705
1361	CPB2	1.13613	0.000536556		1361	CPB2	1.135	0.000154844		7351	UCP2	1.19877	0.000623924
2264	FGFR4	1.13523	1.37001e-05		762	CA4	1.13109	0.00833646		4837	NNMT	1.1882	0.000178278
3276	PRMT1	1.13415	2.83833e-06		629	CFB	1.12703	0.0024015		4830	NME1	1.18294	2.51806e-05
39	ACAT2	1.13232	0.00771377		7301	TYRO3	1.12444	0.000512653		2872	MKNK2	1.16858	1.75968e-05
10590	SCGN	1.13201	0.00239613		31	ACACA	1.11982	6.45824e-05		NA	ACY1	1.16262	8.20942e-05
5050	PAFAH1B3	1.12626	0.00504487		79711	IPO4	1.11713	8.98719e-05		9232	PTTG1	1.16085	5.45527e-06
NA	ACY1	1.10957	0.000251362		3294	HSD17B2	1.09971	0.00102078		55227	LRRC1	1.1537	0.00426882
2584	GALK1	1.1087	0.00378003		8435	SOAT2	1.0969	0.000362008		55825	PECR	1.15175	0.00746707
2560	GABRB1	1.10501	0.000163255		3276	PRMT1	1.09665	2.16707e-05		8555	CDC14B	1.14423	0.000164166
50814	NSDHL	1.10401	0.000115063		5174	PDZK1	1.09368	0.00133071		NA	APITD1	1.14044	0.00301663
7301	TYRO3	1.10236	0.000867037		1479	CSTF3	1.08256	0.00178186		2877	GPX2	1.14	1.98654e-06
3309	HSPA5	1.10216	4.51809e-05		3990	LIPC	1.07969	6.04792e-06		25945	PVRL3	1.13242	0.000312721
445	ASS1	1.09608	0.000140331		5507	PPP1R3C	1.07876	8.97372e-05		54997	TESC	1.12918	0.0023457
79711	IPO4	1.09471	0.00015053		2584	GALK1	1.07265	0.00389561		92667	C20orf72	1.12517	0.000295313
1786	DNMT1	1.08979	0.000530341		6159	RPL29	1.07174	0.00065809		26225	ARL5A	1.11636	0.00659239
26577	PCOLCE2	1.08347	1.7221e-05		5646	PRSS3	1.06831	0.000460459		7763	ZFAND5	1.11139	6.65021e-05
84706	GPT2	1.08126	2.30762e-06		5444	PON1	1.06815	0.000797147		924	CD7	1.10297	0.0100896
5646	PRSS3	1.07923	0.000538759		26873	OPLAH	1.06814	9.60475e-05		10252	SPRY1	1.09969	7.56213e-06
2746	GLUD1	1.068	0.000991507		1786	DNMT1	1.06417	0.000525168		27338	UBE2S	1.09225	2.99581e-05
6159	RPL29	1.06271	0.000947562		4174	MCM5	1.04321	0.0073866		968	CD68	1.08508	0.00041424
27018	NGFRAP1	1.06182	1.91141e-06		7104	TM4SF4	1.04076	1.27518e-05		1543	CYP1A1	1.08291	5.29426e-08
4922	NTS	1.05959	0.00357852		23175	LPIN1	1.0305	0.000157752		6201	RPS7	1.08136	0.00147336
3992	FADS1	1.05394	2.84264e-05		84059	GPR98	1.02855	0.000333147		10137	CPNE1	1.0731	2.80141e-06
10053	AP1M2	1.05389	1.28981e-06		10763	NES	1.02841	0.00120836		10720	UGT2B11	1.07175	0.00167204
56301	SLC7A10	1.05009	9.85179e-08		3992	FADS1	1.02604	2.84413e-05		8804	CREG1	1.07007	0.000516268
27131	SNX5	1.04883	0.000162334		706	TSPO	1.0228	0.00406373		5245	PHB	1.06613	0.00297115
1373	CPS1	1.04852	0.000503422		5947	RBP1	1.01632	0.00778102		7088	TLE1	1.06372	6.09503e-05
10763	NES	1.04262	0.00141041		113655	MFSD3	1.01548	7.98429e-05		114571	SLC22A9	1.0607	3.14646e-05
6723	SRM	1.03675	4.2907e-06		57733	GBA3	1.01012	0.00435686		2790	GNG10	1.06022	0.00422909
56944	OLFML3	1.03435	0.000427862		433	ASGR2	1.00997	1.97753e-06		3309	HSPA5	1.05632	1.1439e-05
5422	POLA1	1.03431	0.00119835		2560	GABRB1	1.00355	0.00036664		79647	AKIRIN1	1.04883	0.00683035
3990	LIPC	1.03249	1.37001e-05		84706	GPT2	1.00113	5.59892e-06		8935	SKAP2	1.04415	7.76136e-05
23175	LPIN1	1.02883	0.000213685		4047	LSS	1.00031	1.85983e-06		9133	CCNB2	1.04395	0.000744475
84059	GPR98	1.02348	0.000459233		5328	PLAU	0.998197	0.000723965		7108	TM7SF2	1.04039	0.00286384
706	TSPO	1.02133	0.00541598		NA	BOLA2B	0.996522	0.00845952		5422	POLA1	1.03969	0.000425568
5444	PON1	1.0187	0.00171717		1890	TYMP	0.996063	0.00090572		3957	LGALS2	1.03616	1.32975e-05
7052	TGM2	1.01869	2.24829e-05		83959	SLC4A11	0.994974	0.0064778		2810	SFN	1.03313	0.000370066
5699	PSMB10	1.01635	0.000740723		31	ACACA	0.99238	0.000507313		3303	HSPA1A	1.03115	6.37388e-07
113655	MFSD3	1.01357	0.00010789		27018	NGFRAP1	0.991054	3.8458e-06		7374	UNG	1.02851	0.00264428
10606	PAICS	1.00349	5.07998e-08		3547	IGSF1	0.980608	6.20731e-05		255043	TMEM86B	1.0265	0.000165562
11000	SLC27A3	1.00187	2.37812e-05		4830	NME1	0.979734	5.13866e-05		595	CCND1	1.02001	0.000379122
10808	HSPH1	1.00128	0.000138164		3898	LAD1	0.97929	0.00218665		7407	VARS	1.01871	2.48485e-07
10606	PAICS	0.988479	1.65218e-07		56301	SLC7A10	0.977603	2.46609e-07		64327	LMBR1	1.01028	0.00135556
4678	NASP	0.986906	7.09257e-06		23231	SEL1L3	0.97719	0.000961125		55365	TMEM176A	1.0101	0.000102467
29925	GMPPB	0.985225	0.000294563		2810	SFN	0.975848	2.55304e-05		51537	MTFP1	1.00599	0.0019218
5174	PDZK1	0.985168	0.0048787		50814	NSDHL	0.969124	0.000369634		8424	BBOX1	0.999508	1.18891e-05
8558	CDK10	0.983317	7.71493e-05		100133941	DQ893812	0.966797	0.00332575		91768	CABLES1	0.997697	0.00723372
55825	PECR	0.98268	4.51809e-05		4678	NASP	0.963599	7.9593e-06		440	ASNS	0.994965	1.84749e-05
79019	CENPM	0.978714	0.000136506		55937	APOM	0.962202	0.00184597		649946	RPL23AP64	0.992594	0.00171901
4830	NME1	0.976418	7.03037e-05		6720	SREBF1	0.959559	0.000280966		4176	MCM7	0.987717	0.000117284
3856	KRT8	0.968163	3.50767e-05		10205	MPZL2	0.955868	0.000417967		122786	FRMD6	0.987154	0.000621585
1361	CPB2	0.963454	0.00128969		26577	PCOLCE2	0.951401	6.45824e-05		85441	PRIC285	0.985476	2.17975e-05
4128	MAOA	0.961508	0.000358343		55902	ACSS2	0.950584	0.00341483		23645	PPP1R15A	0.984241	3.51046e-05
8435	SOAT2	0.958953	0.0020182		79019	CENPM	0.94962	0.0001416		3158	HMGCS2	0.983305	5.29426e-08
57733	GBA3	0.95765	0.00895695		29881	NPC1L1	0.946681	4.57601e-06		2861	GPR37	0.982837	2.48485e-07
25902	MTHFD1L	0.951358	2.83833e-06		54997	TESC	0.945653	2.64822e-05		6446	SGK1	0.98269	0.000261899
10205	MPZL2	0.951009	0.00058918		2762	GMDS	0.94505	0.000246319		283375	SLC39A5	0.975042	2.559e-06
433	ASGR2	0.949383	6.03003e-06		10162	LPCAT3	0.943309	0.000383979		3145	HMBS	0.97476	0.00831583
3856	KRT8	0.948451	0.000387887		3315	HSPB1	0.94156	0.00134127		10606	PAICS	0.973849	0.00126972
NA	BX110351	0.938355	1.59298e-05		55859	BEX1	0.940558	3.25882e-05		388	RHOB	0.966954	0.00980312
1163	CKS1B	0.936233	5.4728e-06		10053	AP1M2	0.93827	5.33056e-06		138151	NACC2	0.96588	0.000265754
7264	TSTA3	0.935213	0.000973206		11000	SLC27A3	0.937477	3.94889e-05		201164	PLD6	0.965341	0.000683669
2618	GART	0.934129	0.000287699		55902	ACSS2	0.934974	0.00427447		10280	SIGMAR1	0.964799	0.000918798
9768	KIAA0101	0.931145	0.00031121		1278	COL1A2	0.934621	0.00571133		151613	TTC14	0.962389	3.1323e-05
79228	THOC6	0.930472	4.7358e-07		5595	MAPK3	0.933213	0.000734012		79469	BCMSUNL	0.960918	0.000931726
30833	NT5C	0.928053	0.00136866		5422	POLA1	0.932732	0.0024829		79814	AGMAT	0.959695	0.000176771
1163	CKS1B	0.925574	6.23388e-05		8558	CDK10	0.929206	0.000111006		55245	UQCC	0.955784	0.000947273
NA	RANBP1	0.923002	1.15179e-05		30833	NT5C	0.9287	0.00101257		3192	HNRNPU	0.953698	0.0100405
26472	PPP1R14B	0.916304	0.000140331		3990	LIPC	0.92806	1.38249e-05		8558	CDK10	0.953522	0.00842739
2264	FGFR4	0.915114	3.21734e-06		1462	VCAN	0.927822	0.00189098		6431	SRSF6	0.951635	1.5215e-06
7106	TSPAN4	0.913644	0.00330312		64847	SPATA20	0.924862	0.000535685		4173	MCM4	0.948775	0.000202407
26019	UPF2	0.912386	3.67456e-05		1891	ECH1	0.923557	1.01861e-05		5147	PDE6D	0.946229	6.62865e-05
118881	COMTD1	0.901086	1.28596e-05		2264	FGFR4	0.922167	2.30214e-06		NA	RANBP1	0.943764	0.00181839
1910	EDNRB	0.898133	0.000207431		27077	B9D1	0.920553	6.78775e-05		58516	FAM60A	0.939815	0.000316647
7866	IFRD2	0.898081	4.12826e-05		7106	TSPAN4	0.919929	0.00232646		4860	PNP	0.938143	0.000707294
5649	RELN	0.894425	8.57224e-06		55825	PECR	0.916139	8.16358e-05		3315	HSPB1	0.93662	0.000384259
29925	GMPPB	0.891497	0.000609493		57706	DENND1A	0.914271	0.000140447		2593	GAMT	0.933837	0.00173217
595	CCND1	0.889571	0.00566962		2592	GALT	0.907577	0.00360185		8970	HIST1H2BJ	0.92622	1.19829e-05
8463	TEAD2	0.885093	0.000234971		400916	CHCHD10	0.905894	0.00146795		90427	BMF	0.924163	0.000515841
3990	LIPC	0.878936	3.97166e-05		949	UBC	0.903681	0.000341559		55366	LGR4	0.91953	8.20942e-05
2810	SFN	0.877846	0.00012372		118881	COMTD1	0.90213	9.08057e-06		133	ADM	0.917607	0.00181699
2653	GCSH	0.874991	0.000195344		586	BCAT1	0.900981	0.000897647		80255	SLC35F5	0.916739	0.000741212
54997	TESC	0.874449	9.40469e-05		127845	GOLT1A	0.899521	0.00701841		114571	SLC22A9	0.91444	3.64253e-06
216	ALDH1A1	0.872052	0.00990753		NA	APOC4-APOC2	0.893824	0.00732306		54961	SSH3	0.913482	0.000185173
9406	ZRANB2	0.871718	0.00695845		4547	MTTP	0.893191	0.000318019		152007	GLIPR2	0.91313	8.00477e-06
54961	SSH3	0.868342	0.00330234		2618	GART	0.889788	0.000378637		57678	GPAM	0.911651	0.000949409
64847	SPATA20	0.866545	0.00143591		55755	CDK5RAP2	0.888574	0.0001156		84647	PLA2G12B	0.908231	0.00198553
5902	RANBP1	0.864572	1.44771e-05		2746	GLUD1	0.886413	0.00464804		NA	GSTA1	0.906637	3.23822e-05
57418	WDR18	0.864287	0.000159078		55723	ASF1B	0.885824	5.26351e-05		84058	WDR54	0.903882	0.00234163
5595	MAPK3	0.862719	0.00217509		7264	TSTA3	0.88176	0.00133071		338758	LOC338758	0.902768	6.97208e-07
1503	CTPS	0.862306	0.000374206		27077	B9D1	0.880682	4.11531e-05		54206	ERRFI1	0.902005	0.000513708
7104	TM4SF4	0.859264	0.000177232		3698	ITIH2	0.8746	0.000300906		63901	FAM111A	0.897832	0.00451189
1806	DPYD	0.85589	0.00746476		8463	TEAD2	0.874239	0.000203959		196	AHR	0.896995	0.0022272
3547	IGSF1	0.85471	0.000388206		27131	SNX5	0.8728	0.000954491		55163	PNPO	0.89311	0.00217662
23231	SEL1L3	0.854061	0.00478139		1290	COL5A2	0.863051	0.000865009		7050	TGIF1	0.889452	2.49439e-05
26873	OPLAH	0.852444	0.00156548		56944	OLFML3	0.858428	0.00229221		4175	MCM6	0.888758	1.16859e-05
10327	AKR1A1	0.85232	0.000130706		10280	SIGMAR1	0.85724	1.73213e-05		55281	TMEM140	0.888529	9.29223e-07
79017	GGCT	0.847506	0.00144718		79228	THOC6	0.854747	1.16946e-06		NA	HIST2H2AA4	0.888415	3.23822e-05
27077	B9D1	0.846978	0.000234971		2882	GPX7	0.852922	0.000959092		2296	FOXC1	0.885529	4.28081e-05
55859	BEX1	0.845462	0.000156485		7169	TPM2	0.852461	0.00151909		10370	CITED2	0.883624	0.00693538
949	UBC	0.845374	0.000961616		55140	ELP3	0.852248	0.00798015		57733	GBA3	0.878528	0.000744879
6627	SNRPA1	0.842565	0.00881693		4015	LOX	0.850029	0.000123896		80204	FBXO11	0.875275	0.00020915
1290	COL5A2	0.840021	0.00150538		8842	PROM1	0.84836	0.00060199		306	ANXA3	0.874801	0.00244231
84899	TMTC4	0.839417	3.53294e-05		1644	DDC	0.847787	0.000271945		3990	LIPC	0.869464	0.000512345
27077	B9D1	0.836848	0.000103851		5595	MAPK3	0.846508	0.00121485		23568	ARL2BP	0.867956	2.70996e-05
1854	DUT	0.836774	4.90764e-05		166	AES	0.846411	0.000731808		114882	OSBPL8	0.865928	1.50563e-05
63910	SLC17A9	0.835638	0.00270827		84300	C6orf125	0.845945	0.00513969		115123	March3	0.861572	0.000351876
1644	DDC	0.832881	0.000432956		29925	GMPPB	0.845616	0.0012		100132406	NBPF1	0.86088	6.97172e-07
79003	MIS12	0.832839	0.00625612		2182	ACSL4	0.845367	0.00135753		10199	MPHOSPH10	0.857604	0.000392481
348093	RBPMS2	0.8292	0.0100618		5649	RELN	0.844188	1.29562e-05		7779	SLC30A1	0.855239	4.70972e-07
130013	ACMSD	0.8284	0.000907789		10280	SIGMAR1	0.843042	1.70301e-05		9156	EXO1	0.855038	1.38477e-05
29974	A1CF	0.82397	1.68454e-05		29974	A1CF	0.842069	9.08057e-06		2892	GRIA3	0.854902	0.000102964
56339	METTL3	0.823561	0.00117574		6229	RPS24	0.841136	3.01424e-05		10581	IFITM2	0.854851	8.23057e-06
10947	AP3M2	0.823285	1.79378e-07		10606	PAICS	0.840336	3.44475e-07		8195	MKKS	0.852705	1.36057e-05
26472	PPP1R14B	0.819792	0.00189431		13	AADAC	0.838358	0.00791942		5050	PAFAH1B3	0.852501	6.56116e-05
130576	LYPD6B	0.819135	0.000281804		3856	KRT8	0.836561	0.00115665		432	ASGR1	0.849401	1.23861e-06
1890	TYMP	0.818993	0.00774823		51668	HSPB11	0.835326	0.000429238		56241	SUSD2	0.849108	0.000431928
8435	SOAT2	0.812871	0.00414701		51171	HSD17B14	0.834226	0.00156961		56667	MUC13	0.846153	0.000625594
10263	CDK2AP2	0.811435	0.000350066		8435	SOAT2	0.832941	0.00246213		79019	CENPM	0.843686	0.00074129
57820	CCNB1IP1	0.811278	0.000291746		7276	TTR	0.831512	0.00319544		5174	PDZK1	0.840812	0.000302286
6229	RPS24	0.809471	6.56981e-05		3936	LCP1	0.828059	0.00424516		26577	PCOLCE2	0.83953	0.00244724
2593	GAMT	0.805096	0.00199757		1842	ECM2	0.827284	0.00743715		5902	RANBP1	0.839229	0.00636421
4815	NINJ2	0.803781	0.00117574		10280	SIGMAR1	0.826182	6.35884e-05		1891	ECH1	0.838448	0.00800089
5976	UPF1	0.799092	0.000287699		130013	ACMSD	0.82572	0.000706571		400916	CHCHD10	0.834869	0.00995608
2593	GAMT	0.798177	0.00479288		338094	FAM151A	0.821674	0.0029385		9877	ZC3H11A	0.831343	0.000552418
57706	DENND1A	0.79738	0.000896504		130576	LYPD6B	0.821423	0.00020513		13	AADAC	0.830992	9.4698e-05
7936	RDBP	0.796064	0.000411158		353	APRT	0.820856	0.00770712		3017	HIST1H2BD	0.828375	1.01117e-05
3315	HSPB1	0.791729	0.00881489		10327	AKR1A1	0.81959	0.000152706		7170	TPM3	0.827965	0.0100509
1468	SLC25A10	0.789976	0.000146398		100885850	AARSD1	0.819567	8.32263e-05		10492	SYNCRIP	0.826528	0.00738745
9277	WDR46	0.789857	0.00010747		79814	AGMAT	0.81585	0.00840527		125228	C18orf19	0.826275	0.00123825
79017	GGCT	0.787185	1.69001e-05		4815	NINJ2	0.814759	0.000756359		6476	SI	0.823834	0.00438406
4015	LOX	0.787156	0.000390331		10947	AP3M2	0.814734	2.46609e-07		5594	MAPK1	0.821702	0.00103785
79019	CENPM	0.786525	0.00147763		3182	HNRNPAB	0.814114	6.43131e-06		1015	CDH17	0.819909	1.64202e-05
5570	PKIB	0.785935	0.00533665		51160	VPS28	0.811758	0.00226034		7867	MAPKAPK3	0.818639	0.00330443
84513	PPAPDC1B	0.782676	2.07241e-06		29925	GMPPB	0.810562	0.00127186		58528	RRAGD	0.816574	0.00140112
2582	GALE	0.781331	0.00173317		10049	DNAJB6	0.810152	0.000460459		2	A2M	0.813373	1.37667e-06
3068	HDGF	0.780797	2.3842e-05		1152	CKB	0.808913	0.00103147		383	ARG1	0.812922	2.52905e-06
2882	GPX7	0.780033	0.00311146		3856	KRT8	0.805955	8.97372e-05		NA	HSD17B7P2	0.812821	0.0011522
55540	IL17RB	0.777909	0.00353982		4669	NAGLU	0.804586	0.000123896		151987	PPP4R2	0.812423	0.0019218
5832	ALDH18A1	0.776915	5.86047e-05		9277	WDR46	0.800674	6.77586e-05		3875	KRT18	0.807436	0.00173466
4832	NME3	0.776788	0.0042675		NA	RPL36A	0.799558	0.0038356		6654	SOS1	0.807309	0.000515841
28969	BZW2	0.775287	2.62671e-05		5976	UPF1	0.798028	0.000223045		3312	HSPA8	0.805605	2.52602e-05
5591	PRKDC	0.773568	2.11053e-05		10606	PAICS	0.797881	2.5768e-06		201254	STRA13	0.804798	0.00403677
3182	HNRNPAB	0.770036	1.69001e-05		54961	SSH3	0.795964	0.00557092		10808	HSPH1	0.803018	0.00886638
55920	RCC2	0.769695	0.00016271		23654	PLXNB2	0.78928	0.0060008		23306	TMEM194A	0.801684	0.00463891
56952	PRTFDC1	0.76958	0.000374206		NA	CHKB	0.788178	0.00682976		29094	HSPC159	0.801621	0.000349066
50865	HEBP1	0.769417	0.000100798		2153	F5	0.785974	0.00475189		1290	COL5A2	0.80078	0.000107305
51557	LGSN	0.768759	8.99275e-05		25902	MTHFD1L	0.783984	2.64822e-05		10924	SMPDL3A	0.799017	0.000709952
440585	FAM183A	0.768355	0.00132918		NA	BX110351	0.781839	0.000109487		9518	GDF15	0.797854	3.79591e-08
119559	SFXN4	0.768003	5.59476e-05		7448	VTN	0.778628	0.00465543		9245	GCNT3	0.796743	7.20316e-05
9497	SLC4A7	0.766636	0.00754572		79071	ELOVL6	0.775861	3.44475e-07		3491	CYR61	0.794827	6.97172e-07
10205	MPZL2	0.766028	0.00466638		79035	OBFC2B	0.775147	0.000336617		5412	UBL3	0.793724	0.00964205
9543	IGDCC3	0.765774	0.000220577		5213	PFKM	0.774137	0.0027773		2040	STOM	0.791876	0.000463382
2202	EFEMP1	0.763376	0.00843131		2593	GAMT	0.770506	0.00230621		83641	FAM107B	0.78747	9.10169e-06
11284	PNKP	0.76289	0.000170587		7106	TSPAN4	0.769377	0.006655		113263	GLCCI1	0.783388	0.00303854
4522	MTHFD1	0.76278	4.42365e-05		2202	EFEMP1	0.768844	0.0102424		7076	TIMP1	0.783213	0.000924584
400916	CHCHD10	0.756592	0.0101702		55920	RCC2	0.76858	0.000123947		79763	ISOC2	0.782037	0.0041276
7169	TPM2	0.756342	0.000312847		54498	SMOX	0.768001	0.00506766		64853	AIDA	0.781769	0.000350311
7169	TPM2	0.754613	0.00634526		9543	IGDCC3	0.762333	0.000173036		51557	LGSN	0.781106	0.000107305
NA	RPL36A	0.751028	0.00862285		1910	EDNRB	0.761748	0.000975567		4942	OAT	0.778099	0.000135121
28976	ACAD9	0.748651	0.000170368		1460	CSNK2B	0.761128	4.03405e-07		7169	TPM2	0.777667	0.000541719
4860	PNP	0.748382	0.000162334		51065	RPS27L	0.760896	7.9593e-06		10611	PDLIM5	0.777326	0.00206235
5236	PGM1	0.745583	0.000780462		284111	SLC13A5	0.760873	0.00918394		4173	MCM4	0.775931	0.000989374
2786	GNG4	0.742668	0.00426323		8991	SELENBP1	0.760654	0.000546197		118881	COMTD1	0.775624	0.00147336
39	ACAT2	0.742287	9.29848e-05		9374	PPT2	0.759699	0.00632939		375061	FAM89A	0.77428	8.8382e-07
5833	PCYT2	0.740028	0.000370632		51024	FIS1	0.759317	0.000375849		2882	GPX7	0.770883	0.00434308
3698	ITIH2	0.739207	0.0024113		6576	SLC25A1	0.758152	0.000204717		51128	SAR1B	0.770672	0.00188966
51668	HSPB11	0.736853	0.00217509		63910	SLC17A9	0.758009	0.00505082		4552	MTRR	0.768675	0.00179543
4547	MTTP	0.73331	0.0033141		28976	ACAD9	0.756811	0.000116388		6147	RPL23A	0.765274	9.52423e-05
10162	LPCAT3	0.731666	0.00659701		65109	UPF3B	0.75552	0.00181444		6604	SMARCD3	0.762903	0.00551778
166	AES	0.731632	0.00414012		27243	CHMP2A	0.753409	0.00480475		339122	RAB43	0.759551	0.00866993
10797	MTHFD2	0.730209	3.22244e-05		25849	PARM1	0.753138	0.00810929		2224	FDPS	0.759394	0.000351876
54498	SMOX	0.728739	0.0102953		57418	WDR18	0.75159	0.000591265		5210	PFKFB4	0.758997	0.00381248
2242	FES	0.727953	0.000669934		9768	KIAA0101	0.750151	0.00234678		6720	SREBF1	0.757847	0.00582912
65003	MRPL11	0.727773	0.00242298		5832	ALDH18A1	0.746441	7.0304e-05		3992	FADS1	0.756047	0.00297774
1152	CKB	0.72761	0.00389656		2786	GNG4	0.746404	0.00306231		858	CAV2	0.752221	0.000183101
908	CCT6A	0.725854	8.80869e-05		84899	TMTC4	0.746277	0.000107012		5595	MAPK3	0.751737	0.00225334
10131	TRAP1	0.725497	7.13579e-05		29974	A1CF	0.744385	5.10779e-05		2634	GBP2	0.750977	0.00192626
11015	KDELR3	0.725426	0.0031047		7936	RDBP	0.743737	0.000684109		9749	PHACTR2	0.749444	0.00350607
22948	CCT5	0.724928	0.00015623		4832	NME3	0.743606	0.00480475		10236	HNRNPR	0.748914	0.000521032
6697	SPR	0.719343	0.000201587		433	ASGR2	0.743277	0.000173533		445	ASS1	0.747922	2.79019e-05
23306	TMEM194A	0.715906	3.97166e-05		81621	KAZALD1	0.742935	0.00454566		91404	SESTD1	0.744561	0.00534597
4047	LSS	0.714768	0.000172146		7866	IFRD2	0.741989	0.00029804		23095	KIF1B	0.741173	0.0104369
192666	KRT24	0.713042	0.00131349		3315	HSPB1	0.739601	0.00539797		51111	SUV420H1	0.740551	6.09503e-05
196483	FAM86A	0.7125	2.04105e-06		85012	TCEAL3	0.739598	0.00242679		222658	KCTD20	0.740437	0.00306688
29881	NPC1L1	0.712043	0.000186413		440585	FAM183A	0.736275	0.00152923		7323	UBE2D3	0.740076	0.009308
6476	SI	0.711897	0.00216884		10205	MPZL2	0.736019	0.00507848		1842	ECM2	0.739882	0.0013038
23590	PDSS1	0.711835	0.00175639		6319	SCD	0.734939	0.000457917		119467	CLRN3	0.738844	0.000817626
7867	MAPKAPK3	0.711451	0.000953524		4793	NFKBIB	0.734057	0.000660503		3385	ICAM3	0.738054	2.89107e-05
55748	CNDP2	0.710284	4.02815e-05		4595	MUTYH	0.733016	0.00622976		121506	ERP27	0.737323	0.00132118
4552	MTRR	0.710025	0.000163467		1468	SLC25A10	0.732674	0.000260405		8842	PROM1	0.73723	0.00182251
1460	CSNK2B	0.709077	1.43959e-06		65003	MRPL11	0.731809	0.00172544		10280	SIGMAR1	0.735629	0.00264428
79075	DSCC1	0.708709	0.00144718		10808	HSPH1	0.731421	0.00297178		375061	FAM89A	0.732724	4.87685e-07
115749	C12orf56	0.708643	0.00298974		1163	CKS1B	0.73086	9.279e-05		NA	HIST2H2AA4	0.732424	0.00194177
100885850	AARSD1	0.707514	0.000571437		8153	RND2	0.730414	0.00312907		166	AES	0.732204	0.00276371
8153	RND2	0.707431	0.00554697		196483	FAM86A	0.729302	1.08208e-06		440	ASNS	0.729373	0.00262506
115827	RAB3C	0.704904	0.00526652		3306	HSPA2	0.72867	0.00475189		871	SERPINH1	0.729163	0.00683208
10049	DNAJB6	0.702103	0.00276677		4050	LTB	0.726901	0.00324816		1647	GADD45A	0.728859	0.00604749
275	AMT	0.701503	0.00136864		51557	LGSN	0.726704	0.000123947		8767	RIPK2	0.728762	0.00602142
11243	PMF1	0.700076	0.0015824		5053	PAH	0.725421	0.00341877		2938	GSTA1	0.728382	0.000917881
433	ASGR2	0.699369	0.000459233		7169	TPM2	0.72442	0.000383979		993	CDC25A	0.727963	0.000136681
132158	GLYCTK	0.698805	0.000430849		94097	SFXN5	0.723363	0.000324548		3181	HNRNPA2B1	0.727568	0.00363825
2027	ENO3	0.698319	9.78649e-05		51160	VPS28	0.722995	0.00376336		NA	CPNE1	0.726544	0.000683669
55755	CDK5RAP2	0.697541	0.00216385		10327	AKR1A1	0.72151	0.000865119		100288413	LOC100288413	0.724424	0.000687768
6319	SCD	0.693495	3.97385e-05		79017	GGCT	0.721071	0.00517981		64847	SPATA20	0.721771	0.0019218
8842	PROM1	0.693384	0.00578359		4860	PNP	0.719989	0.000191774		4493	MT1E	0.719998	6.20983e-09
100101266	LOC100101266	0.689356	8.34252e-05		1278	COL1A2	0.719042	0.00199028		998	CDC42	0.718261	9.99616e-06
79783	C7orf10	0.686838	0.000150805		26472	PPP1R14B	0.718445	0.0050391		3248	HPGD	0.718256	0.00366508
23306	TMEM194A	0.684082	0.00136126		132158	GLYCTK	0.718366	0.000240189		2939	GSTA2	0.717296	0.00953751
4050	LTB	0.682432	0.00748187		4552	MTRR	0.717936	0.000111594		166815	TIGD2	0.716898	0.0099989
1528	CYB5A	0.681283	0.00503305		39	ACAT2	0.716991	0.000102539		NA	RPL23AP7	0.715825	0.0072879
119559	SFXN4	0.68108	0.00192213		11343	MGLL	0.715683	0.00392775		9166	EBAG9	0.715513	0.00531574
29974	A1CF	0.680668	0.000183885		7049	TGFBR3	0.715674	0.00292963		8805	TRIM24	0.715271	1.38477e-05
6319	SCD	0.67919	0.00143505		4522	MTHFD1	0.715321	7.29258e-05		2628	GATM	0.713832	1.53579e-06
4830	NME1	0.674326	0.000254679		4833	NME4	0.710887	0.000429238		6372	CXCL6	0.712028	7.04465e-05
80144	FRAS1	0.674004	0.00427305		80115	BAIAP2L2	0.709826	0.000351622		348093	RBPMS2	0.711684	0.00194997
64757	MOSC1	0.669543	0.0103607		6275	S100A4	0.709687	0.00325195		462	SERPINC1	0.711404	0.000675532
79071	ELOVL6	0.669063	3.15772e-06		23306	TMEM194A	0.708919	3.21231e-05		84309	NUDT16L1	0.710506	0.00728438
2171	FABP5	0.668871	0.000170368		NA	MIR1307	0.7078	0.00122981		2762	GMDS	0.70792	2.54648e-05
11015	KDELR3	0.667687	2.6341e-05		50865	HEBP1	0.707421	0.000194736		54805	CNNM2	0.706784	0.000107382
5424	POLD1	0.6647	0.00166883		56339	METTL3	0.705129	0.00399249		140735	DYNLL2	0.706743	0.00380261
8991	SELENBP1	0.664355	0.00296402		7423	VEGFB	0.703255	0.00337858		4172	MCM3	0.704883	1.5255e-05
4927	NUP88	0.658917	0.00822241		NA	MIFR-1	0.702463	0.000731808		10365	KLF2	0.704381	0.00081077
4669	NAGLU	0.657779	0.00152614		1854	DUT	0.70187	0.000291049		3990	LIPC	0.700105	1.19372e-05
10400	PEMT	0.652123	0.0100935		6275	S100A4	0.700394	0.000383979		55151	TMEM38B	0.699952	0.000875263
166	AES	0.651408	0.00855173		79783	C7orf10	0.699116	9.279e-05		151195	CCNYL1	0.699882	0.00264428
55245	UQCC	0.650974	0.000947562		5364	PLXNB1	0.698068	0.000148188		6205	RPS11	0.699865	0.00539836
527	ATP6V0C	-0.651602	0.00547666		26472	PPP1R14B	0.691524	0.00222261		2768	GNA12	0.698886	0.00107169
9117	SEC22C	-0.651724	5.90488e-05		80205	CHD9	0.689396	0.00978942		10505	SEMA4F	0.696544	5.35875e-05
NA	FAM47E-STBD1	-0.65286	0.00142751		NA	AY358864	0.68897	0.00200144		55140	ELP3	0.695783	0.00158856
144363	LYRM5	-0.654715	0.000104927		28969	BZW2	0.688178	8.32263e-05		3315	HSPB1	0.695255	0.000385745
222389	BEND7	-0.654736	0.00498401		4830	NME1	0.686042	0.000159746		1786	DNMT1	0.694904	0.000112916
84248	FYTTD1	-0.655401	0.00299142		1503	CTPS	0.683401	0.00319932		65258	MPPE1	0.693383	0.00264135
116987	AGAP1	-0.656087	0.00264908		27018	NGFRAP1	0.682425	0.000240189		10038	PARP2	0.693181	0.000316647
339122	RAB43	-0.656555	2.94122e-05		79019	CENPM	0.679991	0.00457706		50814	NSDHL	0.692704	0.00344203
55233	MOBKL1B	-0.658144	0.00195907		NA	NA	0.678389	0.00739266		9718	ECE2	0.691319	0.00091005
901	CCNG2	-0.659398	0.00649652		10954	PDIA5	0.676092	0.00205845		25987	TSKU	0.690866	0.00484188
55508	SLC35E3	-0.660162	0.00011924		57820	CCNB1IP1	0.675272	0.00162379		10205	MPZL2	0.689301	0.00173217
7013	TERF1	-0.660875	0.00181891		2653	GCSH	0.669627	0.00258546		220001	VWCE	0.684391	6.90123e-06
8634	RTCD1	-0.661093	0.00110918		80144	FRAS1	0.669109	0.00341877		2091	FBL	0.682583	0.0019218
5728	PTEN	-0.661718	0.010154		445	ASS1	0.662801	0.00143702		NA	AW276479	0.681368	0.00286384
3280	HES1	-0.66209	0.00728534		119559	SFXN4	0.661736	0.000236744		10124	ARL4A	0.680134	0.00240995
150465	TTL	-0.662358	0.00208273		6723	SRM	0.661432	0.000752057		64332	NFKBIZ	0.67981	4.74172e-05
5412	UBL3	-0.662476	0.00130892		3192	HNRNPU	0.660863	0.000200791		3026	HABP2	0.679768	1.5215e-06
58487	CREBZF	-0.662789	0.000249066		286257	C9orf142	0.66075	0.00261054		22948	CCT5	0.679026	0.00690336
54838	C10orf26	-0.664302	0.000306202		27102	EIF2AK1	-0.661442	0.000249161		9045	RPL14	0.678329	2.98559e-05
57522	SRGAP1	-0.665006	0.00620672		7259	DSE	-0.66159	0.00200551		261726	TIPRL	0.678311	0.00161896
10049	DNAJB6	-0.665123	0.000266		6431	SRSF6	-0.662052	0.00180916		949	UBC	0.677833	0.00555377
5594	MAPK1	-0.668889	0.00043833		22926	ATF6	-0.662142	0.00148894		6144	RPL21	0.676037	0.00208194
56262	LRRC8A	-0.669151	0.00556873		51103	NDUFAF1	-0.664908	0.00190029		5937	RBMS1	0.675909	0.00346855
4320	MMP11	-0.669986	3.97385e-05		291	SLC25A4	-0.66606	0.00180006		NA	LOC100129186	0.675313	0.000271799
100009676	LOC100009676	-0.670479	0.000838912		598	BCL2L1	-0.666199	0.00537092		3075	CFH	0.674952	0.0020738
27314	RAB30	-0.671063	0.000401637		81689	ISCA1	-0.667302	0.000664007		50848	F11R	0.674816	0.00260742
159013	CXorf38	-0.674095	0.000500166		645676	LOC645676	-0.667626	5.10779e-05		5444	PON1	0.674782	0.00158238
5194	PEX13	-0.676254	0.00746703		9371	KIF3B	-0.668242	0.0100099		5213	PFKM	0.673366	0.00410427
54680	ZNHIT6	-0.676808	0.00652701		3181	HNRNPA2B1	-0.668472	0.000507313		641	BLM	0.671488	0.00542048
205564	SENP5	-0.677091	8.18076e-05		79665	DHX40	-0.668668	0.00252767		28969	BZW2	0.670514	0.00562005
3151	HMGN2	-0.677982	0.00223375		90410	IFT20	-0.669117	0.00753566		56915	EXOSC5	0.669677	2.04321e-05
84647	PLA2G12B	-0.680307	0.00910231		388610	TRNP1	-0.67258	0.00289595		3175	ONECUT1	0.668898	0.000116734
440270	GOLGA8B	-0.681007	0.00798674		22920	KIFAP3	-0.672841	0.0103903		2161	F12	0.668476	0.00963759
7328	UBE2H	-0.681155	0.00366468		9117	SEC22C	-0.672856	0.00767475		3151	HMGN2	0.667923	0.00139393
255758	TM4SF19	-0.682395	0.00285587		90141	EFCAB11	-0.674308	0.00371962		221833	SP8	0.666532	6.60867e-05
64795	RMND5A	-0.683746	1.35469e-06		79134	TMEM185B	-0.674745	0.000123027		29128	hNp95	0.665959	0.0019218
NA	BC038747	-0.684056	5.86047e-05		10611	PDLIM5	-0.676678	0.00180006		NA	RPL36A	-0.669888	0.000367989
8660	IRS2	-0.685818	0.0013778		54805	CNNM2	-0.677963	0.000123947		NA	BOLA2B	-0.669937	0.000176295
253152	EPHX4	-0.687288	0.000722525		58528	RRAGD	-0.678921	0.000303913		10049	DNAJB6	-0.670638	0.00148311
7584	ZNF35	-0.687727	0.00461217		55146	ZDHHC4	-0.679316	0.00152923		433	ASGR2	-0.672222	0.00103396
51228	GLTP	-0.688096	0.000907789		115817	DHRS1	-0.681176	0.00955001		4815	NINJ2	-0.673002	0.000698697
8634	RTCD1	-0.688755	0.000722525		663	BNIP2	-0.681631	0.000194736		195827	C9orf21	-0.673273	8.20942e-05
664	BNIP3	-0.68905	0.000722525		58487	CREBZF	-0.683401	0.000130581		116843	C6orf192	-0.67472	6.59588e-06
143686	SESN3	-0.691096	0.000323542		55233	MOBKL1B	-0.6842	0.000995204		307	ANXA4	-0.675432	0.000942576
4929	NR4A2	-0.693755	0.000354843		55653	BCAS4	-0.684404	0.00862932		56893	UBQLN4	-0.676078	0.00262464
7681	MKRN3	-0.69429	6.04193e-05		55339	WDR33	-0.684817	0.00854719		90231	KIAA2013	-0.676804	0.000572969
22853	LMTK2	-0.694569	0.00011924		64121	RRAGC	-0.685047	0.000410266		NA	CORO7	-0.677611	0.000274839
1655	DDX5	-0.694833	0.000271245		5533	PPP3CC	-0.685362	0.00269899		5279	PIGC	-0.677916	0.00138138
10670	RRAGA	-0.695795	0.00261779		81889	FAHD1	-0.686758	0.00434437		678	ZFP36L2	-0.67954	6.35739e-06
55765	C1orf106	-0.696537	0.0051938		161742	SPRED1	-0.687237	0.006655		55504	TNFRSF19	-0.682598	0.00947557
6651	SON	-0.698896	0.00547666		55069	C7orf42	-0.688376	0.000180123		84798	C19orf48	-0.688201	0.00271477
54842	MFSD6	-0.69982	0.000144642		79647	AKIRIN1	-0.688638	0.00895209		7546	ZIC2	-0.690988	0.00224164
58528	RRAGD	-0.700062	0.000281804		9054	NFS1	-0.690694	0.0012653		8338	HIST2H2AC	-0.692565	0.00336103
54805	CNNM2	-0.700268	0.000115991		9371	KIF3B	-0.690855	0.00126283		79711	IPO4	-0.693712	0.00012867
9960	USP3	-0.703185	0.00585009		9117	SEC22C	-0.690919	2.1443e-05		1361	CPB2	-0.694367	2.49439e-05
27086	FOXP1	-0.704496	0.000672654		8799	PEX11B	-0.691784	0.000308845		129807	NEU4	-0.694902	3.27898e-05
90141	EFCAB11	-0.705683	0.00322702		150465	TTL	-0.691942	0.00100336		726	CAPN5	-0.694948	0.000312721
285368	PRRT3	-0.706869	0.00149967		25852	ARMC8	-0.693278	0.000736055		85012	TCEAL3	-0.695179	0.00494148
79786	KLHL36	-0.709018	5.9578e-05		55339	WDR33	-0.693629	0.00307339		119559	SFXN4	-0.696144	0.00333606
60343	FAM3A	-0.709835	0.000484439		7328	UBE2H	-0.695475	0.00130038		9117	SEC22C	-0.696657	0.00148668
8895	CPNE3	-0.711396	0.00293143		5594	MAPK1	-0.697957	0.000204798		5832	ALDH18A1	-0.697492	0.00168718
55831	TMEM111	-0.712463	8.04775e-05		10492	SYNCRIP	-0.699055	0.00970118		7301	TYRO3	-0.698021	0.000226667
84310	C7orf50	-0.713273	9.97653e-05		NA	CPNE1	-0.699227	0.000337794		5335	PLCG1	-0.700109	0.000248141
11345	GABARAPL2	-0.715559	5.4728e-06		4170	MCL1	-0.700615	0.00544244		1627	DBN1	-0.700307	0.00395637
10435	CDC42EP2	-0.717416	1.3335e-05		22936	ELL2	-0.706721	0.00694666		90427	BMF	-0.702321	2.14955e-05
8799	PEX11B	-0.718224	0.000263637		162073	ITPRIPL2	-0.706999	0.00524527		3093	UBE2K	-0.702493	8.31033e-05
112936	VPS26B	-0.718516	0.00324913		3052	HCCS	-0.707988	0.0033008		NA	RPL17	-0.703024	0.00506245
27102	EIF2AK1	-0.718687	0.000129841		51128	SAR1B	-0.709122	0.00175057		65018	PINK1	-0.710412	0.0022641
5900	RALGDS	-0.71909	0.00161701		10124	ARL4A	-0.710848	0.0100177		2892	GRIA3	-0.71118	0.000252348
4097	MAFG	-0.719123	0.00151738		135114	HINT3	-0.712924	0.00289579		4547	MTTP	-0.711712	0.00903408
22903	BTBD3	-0.719642	0.00578359		2274	FHL2	-0.713897	0.00866562		1979	EIF4EBP2	-0.712397	0.00320066
9896	FIG4	-0.722876	0.00824473		9063	PIAS2	-0.714587	0.00592081		79783	C7orf10	-0.712491	0.000875946
135114	HINT3	-0.723807	0.00330775		8660	IRS2	-0.715881	0.000664055		55591	VEZT	-0.712795	0.0019218
9266	CYTH2	-0.726129	0.00835456		25	ABL1	-0.717733	1.73434e-08		54985	HCFC1R1	-0.713783	0.00123825
26262	TSPAN17	-0.726974	0.00500955		9419	CRIPT	-0.717963	2.99499e-05		8322	FZD4	-0.715023	0.00142347
3181	HNRNPA2B1	-0.728227	0.000251362		4097	MAFG	-0.719034	0.00114955		8654	PDE5A	-0.715172	0.000796916
400027	LOC400027	-0.73195	3.88054e-05		10435	CDC42EP2	-0.719956	9.08057e-06		54498	SMOX	-0.716296	0.00161753
57570	TRMT5	-0.733306	0.000331236		22903	BTBD3	-0.719988	0.00441775		3856	KRT8	-0.719921	0.000676131
7328	UBE2H	-0.733443	0.00100553		1861	TOR1A	-0.723622	3.21231e-05		2318	FLNC	-0.720093	0.000526218
221	ALDH3B1	-0.733697	0.00788643		2729	GCLC	-0.724165	0.00201099		629	CFB	-0.722542	0.00276371
80176	SPSB1	-0.737108	0.00586042		9846	GAB2	-0.724245	0.00113865		83959	SLC4A11	-0.724198	0.00173466
57568	SIPA1L2	-0.73805	0.00056394		51068	NMD3	-0.725372	0.0035003		56892	C8orf4	-0.724834	2.6188e-05
90410	IFT20	-0.739339	0.00410957		4929	NR4A2	-0.725441	0.000161738		3276	PRMT1	-0.726226	5.99578e-05
79665	DHX40	-0.739569	0.0012485		8473	OGT	-0.726568	0.000870364		8347	HIST1H2BC	-0.726779	0.000695787
80325	ABTB1	-0.73973	0.00164143		60436	TGIF2	-0.73156	0.0038356		10124	ARL4A	-0.727745	0.00314614
359948	IRF2BP2	-0.740819	0.00810215		9749	PHACTR2	-0.73188	0.00261095		7048	TGFBR2	-0.729057	0.00659239
7072	TIA1	-0.741411	0.0015824		54453	RIN2	-0.732596	0.00957987		706	TSPO	-0.729345	5.93931e-05
60436	TGIF2	-0.742036	0.00448868		30844	EHD4	-0.734007	0.000189668		10137	CPNE1	-0.730458	0.0016782
490	ATP2B1	-0.742348	0.0025112		9267	CYTH1	-0.73416	0.0104833		2040	STOM	-0.730546	0.000258464
140460	ASB7	-0.744768	1.38936e-06		NA	ZBTB7B	-0.735374	2.31209e-05		151613	TTC14	-0.731406	9.93683e-06
81689	ISCA1	-0.74662	0.000240742		79786	KLHL36	-0.736518	2.73354e-05		84300	C6orf125	-0.732617	0.000226791
100272147	MTCP1NB	-0.749209	0.000218953		80824	DUSP16	-0.736832	0.000118256		1595	CYP51A1	-0.733793	0.000812193
221079	ARL5B	-0.754517	0.000104927		79469	BCMSUNL	-0.740485	0.00701841		55500	ETNK1	-0.734397	2.91591e-06
22936	ELL2	-0.756571	0.00498314		80148	PQLC1	-0.741735	0.00454566		57570	TRMT5	-0.736485	0.00115586
83861	RSPH3	-0.757438	1.28981e-06		57568	SIPA1L2	-0.742596	0.000396135		51669	TMEM66	-0.736728	0.000210554
25	ABL1	-0.759422	8.86038e-09		55831	TMEM111	-0.742721	3.51751e-05		31	ACACA	-0.736768	6.58601e-05
25798	BRI3	-0.765828	0.000119874		3151	HMGN2	-0.742928	0.000665874		220832	FABP5L3	-0.737854	0.00413632
7328	UBE2H	-0.767574	0.00239613		253152	EPHX4	-0.746912	0.000211301		440585	FAM183A	-0.739192	0.0016782
868	CBLB	-0.769675	0.000530341		80325	ABTB1	-0.748393	0.00110632		26019	UPF2	-0.739565	7.43565e-05
55640	FLVCR2	-0.770296	0.000106117		8634	RTCD1	-0.751276	0.000202914		6920	TCEA3	-0.74264	6.65021e-05
23457	ABCB9	-0.776358	0.00010789		23764	MAFF	-0.75245	0.00815516		79071	ELOVL6	-0.74336	0.0012881
3964	LGALS8	-0.777131	0.00506691		80176	SPSB1	-0.75579	0.00356296		11000	SLC27A3	-0.743737	0.00485184
81689	ISCA1	-0.779488	3.15772e-06		1687	DFNA5	-0.756131	0.00804881		2150	F2RL1	-0.744957	9.8997e-05
118433	RPL23AP7	-0.782974	0.00185652		100506658	OCLN	-0.756654	0.00926346		1847	DUSP5	-0.74566	1.51922e-05
5533	PPP3CC	-0.788724	0.000882013		4790	NFKB1	-0.760726	0.0104833		2353	FOS	-0.745687	7.66752e-07
11258	DCTN3	-0.791526	0.00256758		205564	SENP5	-0.761041	1.34292e-05		84918	LRP11	-0.746706	9.13449e-05
5937	RBMS1	-0.79344	0.00503305		1609	DGKQ	-0.765234	0.00186006		3099	HK2	-0.74706	0.00643457
22920	KIFAP3	-0.793768	0.00318478		NA	APITD1	-0.765362	1.35063e-05		2261	FGFR3	-0.748782	0.00182251
8545	CGGBP1	-0.796171	6.52212e-05		122786	FRMD6	-0.766632	0.000897619		1644	DDC	-0.750561	0.00135556
3985	LIMK2	-0.797149	0.00217856		26190	FBXW2	-0.766996	8.55666e-05		55388	MCM10	-0.751548	1.76193e-05
81889	FAHD1	-0.797549	0.00135988		1601	DAB2	-0.770702	0.00200715		2267	FGL1	-0.753757	0.00122057
116236	ABHD15	-0.797663	0.000621216		26136	TES	-0.77138	0.00414645		26472	PPP1R14B	-0.753912	0.00911718
113263	GLCCI1	-0.802796	0.00326821		84647	PLA2G12B	-0.771481	0.00223555		51111	SUV420H1	-0.754046	0.000641567
80148	PQLC1	-0.802948	0.00289067		8445	DYRK2	-0.77181	0.00404396		7328	UBE2H	-0.755299	0.000134572
26018	LRIG1	-0.804913	0.00012344		9960	USP3	-0.774495	0.00180006		2939	GSTA2	-0.755391	0.00146178
54602	NDFIP2	-0.805915	0.00242298		84925	DIRC2	-0.775087	0.00724748		151195	CCNYL1	-0.755584	0.00036208
146691	TOM1L2	-0.80656	0.000240039		7328	UBE2H	-0.775623	0.000757343		8971	H1FX	-0.756735	0.000205929
80824	DUSP16	-0.807644	5.38389e-05		1999	ELF3	-0.77623	0.000736055		84059	GPR98	-0.756764	6.65479e-05
NA	CHN2	-0.811902	0.00315762		7584	ZNF35	-0.778133	0.00103147		8835	SOCS2	-0.757883	6.02504e-06
80204	FBXO11	-0.81363	0.0080188		7328	UBE2H	-0.779237	0.00153865		1906	EDN1	-0.759447	2.38121e-07
857	CAV1	-0.813843	9.10789e-05		196	AHR	-0.78098	5.10779e-05		3304	HSPA1A	-0.761951	1.70681e-06
23582	CCNDBP1	-0.819668	0.000166218		54432	YIPF1	-0.785926	0.00120294		4595	MUTYH	-0.762037	0.0019218
196	AHR	-0.821757	3.67456e-05		8654	PDE5A	-0.787072	1.21219e-05		10410	IFITM3	-0.762539	1.54544e-05
51128	SAR1B	-0.821983	0.000480462		113263	GLCCI1	-0.788551	0.00291523		79228	THOC6	-0.763817	0.00404137
64121	RRAGC	-0.822449	6.75863e-05		1499	CTNNB1	-0.791955	0.00515367		4942	OAT	-0.764614	6.2626e-05
9419	CRIPT	-0.824235	6.62216e-06		100272147	MTCP1NB	-0.792936	8.74278e-05		1528	CYB5A	-0.765633	0.0102115
440	ASNS	-0.826568	0.0038399		56262	LRRC8A	-0.79331	0.000801094		84899	TMTC4	-0.769833	0.000209844
1999	ELF3	-0.828042	0.000470487		84858	ZNF503	-0.794224	6.04792e-06		NA	RAD51L3-RFFL	-0.77023	0.00180546
NA	DGCR6L	-0.828969	0.00817366		8545	CGGBP1	-0.795319	5.10779e-05		284111	SLC13A5	-0.770941	6.2626e-05
8970	HIST1H2BJ	-0.830305	0.00286551		112936	VPS26B	-0.799241	0.000846809		9117	SEC22C	-0.77243	0.00137462
84196	USP48	-0.831193	0.00613086		29094	HSPC159	-0.799339	0.00611834		664	BNIP3	-0.772983	0.000793181
161742	SPRED1	-0.832417	0.00143591		10253	SPRY2	-0.800307	0.006655		59343	SENP2	-0.773154	0.000157152
9371	KIF3B	-0.8335	0.000214024		84196	USP48	-0.802205	0.00644114		6652	SORD	-0.773777	0.000918066
22926	ATF6	-0.835911	0.000152528		5937	RBMS1	-0.804458	0.0033597		6159	RPL29	-0.774565	1.93464e-05
115123	March3	-0.837725	0.00064556		1453	CSNK1D	-0.807477	0.00145987		84962	JUB	-0.774598	0.000434224
55069	C7orf42	-0.842947	2.17763e-05		55765	C1orf106	-0.814006	0.000860621		6161	RPL32	-0.775152	0.00947653
23048	FNBP1	-0.843498	0.00275407		8895	CPNE3	-0.814817	0.000535685		389084	C2orf82	-0.776173	4.05143e-05
2243	FGA	-0.843859	0.00779318		3151	HMGN2	-0.815956	0.000360099		1278	COL1A2	-0.776696	0.000262838
10381	TUBB3	-0.844616	0.0025533		59343	SENP2	-0.815957	0.00339272		8473	OGT	-0.779317	0.000824792
9584	RBM39	-0.846516	0.00695664		5412	UBL3	-0.817731	9.2789e-05		3312	HSPA8	-0.779782	2.08054e-05
6772	STAT1	-0.850525	0.00318478		8760	CDS2	-0.818048	0.000172255		54165	DCUN1D1	-0.7824	1.51922e-05
2768	GNA12	-0.851075	0.00010789		3280	HES1	-0.823958	0.000664055		NA	AKR1C4	-0.784903	0.00123283
90355	C5orf30	-0.856552	0.00728038		400027	LOC400027	-0.8257	6.46746e-06		10590	SCGN	-0.787485	6.38364e-06
135112	NCOA7	-0.862841	0.00816301		3516	RBPJ	-0.830631	0.00420873		84265	POLR3GL	-0.78925	0.000773556
747	DAGLA	-0.864302	0.00307843		481	ATP1B1	-0.831441	0.0104833		5446	PON3	-0.789354	0.000817646
84925	DIRC2	-0.865469	0.00350905		84265	POLR3GL	-0.831975	0.000125898		4922	NTS	-0.793558	0.00690336
8473	OGT	-0.866956	0.000159078		NA	LOC100129186	-0.834994	0.00158883		4790	NFKB1	-0.794309	0.00181839
51706	CYB5R1	-0.87001	0.00845778		90427	BMF	-0.83598	0.00517981		8045	RASSF7	-0.795125	0.000622079
2110	ETFDH	-0.870376	0.00103207		440	ASNS	-0.838473	0.00160958		2939	GSTA2	-0.795879	0.000131098
10253	SPRY2	-0.871498	0.00409035		55207	ARL8B	-0.841025	0.000398616		5062	PAK2	-0.798358	2.65156e-06
645676	LOC645676	-0.872667	2.07241e-06		2932	GSK3B	-0.843471	0.00481013		6999	TDO2	-0.799464	0.000240488
8767	RIPK2	-0.872744	0.00270849		8204	NRIP1	-0.84395	0.0104833		31	ACACA	-0.800435	0.000960725
NA	ZBTB7B	-0.872944	3.15772e-06		51111	SUV420H1	-0.84504	0.00901578		1462	VCAN	-0.800791	0.00153007
8971	H1FX	-0.874711	0.00450911		79134	TMEM185B	-0.847588	0.00202387		3276	PRMT1	-0.801301	1.96494e-05
84058	WDR54	-0.88228	0.0016073		2768	GNA12	-0.848271	8.51229e-05		130013	ACMSD	-0.801597	0.00105283
8843	GPR109B	-0.883739	0.000500408		664	BNIP3	-0.848552	5.10779e-05		7052	TGM2	-0.80347	1.00887e-06
55207	ARL8B	-0.884948	0.000295772		90427	BMF	-0.850194	0.000846809		25902	MTHFD1L	-0.803864	0.00348984
23764	MAFF	-0.885698	0.00246097		7072	TIA1	-0.851853	0.000265906		375061	FAM89A	-0.807337	7.78406e-06
10492	SYNCRIP	-0.886324	0.00143591		8560	DEGS1	-0.852154	0.000731808		3875	KRT18	-0.807494	0.000151305
140735	DYNLL2	-0.887148	0.00398519		221079	ARL5B	-0.859852	1.48976e-05		9415	FADS2	-0.807692	0.00133739
63027	SLC22A23	-0.887518	0.0066866		130814	PQLC3	-0.864804	0.00479454		26255	PTTG3	-0.809243	1.99526e-05
9232	PTTG1	-0.888529	0.00130227		115123	March3	-0.86539	0.000336869		1479	CSTF3	-0.811411	8.60578e-06
122786	FRMD6	-0.888921	0.00659701		8970	HIST1H2BJ	-0.86856	0.00135098		94241	TP53INP1	-0.811667	7.67838e-05
3484	IGFBP1	-0.891749	0.00114175		8767	RIPK2	-0.869958	0.00207114		8463	TEAD2	-0.812196	0.000596092
166815	TIGD2	-0.893895	0.00314483		90231	KIAA2013	-0.872373	0.000118256		56255	TMX4	-0.81302	0.000214017
26190	FBXW2	-0.895821	1.69304e-05		54602	NDFIP2	-0.873167	0.000807439		23649	POLA2	-0.813096	4.02979e-06
8760	CDS2	-0.899686	7.80747e-05		5594	MAPK1	-0.876077	0.000904604		9249	DHRS3	-0.815736	0.00567199
55504	TNFRSF19	-0.901105	0.000923172		23192	ATG4B	-0.87749	0.000893347		5648	MASP1	-0.817685	0.000538771
79134	TMEM185B	-0.902367	0.00143591		57570	TRMT5	-0.877543	2.99889e-05		2014	EMP3	-0.818578	0.000808297
10161	LPAR6	-0.907164	0.000237774		26061	HACL1	-0.879519	2.31209e-05		345	APOC3	-0.819162	1.04364e-05
115123	March3	-0.90771	0.00140546		9166	EBAG9	-0.887023	0.0103738		4678	NASP	-0.821924	0.000379122
84918	LRP11	-0.909099	0.00347508		84918	LRP11	-0.887549	0.0033008		800	CALD1	-0.822137	0.00161529
79960	PHF17	-0.912518	0.000876041		857	CAV1	-0.889356	2.20391e-05		51330	TNFRSF12A	-0.822598	0.00241247
26061	HACL1	-0.915869	1.88188e-05		80139	ZNF703	-0.894893	0.000544874		7264	TSTA3	-0.822611	0.000166382
84858	ZNF503	-0.920269	1.10126e-06		23582	CCNDBP1	-0.896047	4.53067e-05		3373	HYAL1	-0.825315	6.37956e-05
79616	CCNJL	-0.921968	0.00601939		768211	RELL1	-0.905185	0.00597235		291	SLC25A4	-0.827592	0.00081077
90231	KIAA2013	-0.927798	7.79397e-05		138151	NACC2	-0.906182	8.54582e-06		10327	AKR1A1	-0.830102	0.00933256
130814	PQLC3	-0.930749	0.00319118		652	BMP4	-0.911497	0.000169136		8760	CDS2	-0.831827	0.00419754
2932	GSK3B	-0.931326	0.0025229		166815	TIGD2	-0.912862	0.00192467		344838	PAQR9	-0.833877	5.62642e-06
83641	FAM107B	-0.931872	0.00296494		64327	LMBR1	-0.916145	0.00036664		2182	ACSL4	-0.834722	0.00933256
10672	GNA13	-0.93637	0.000249066		440	ASNS	-0.916908	0.00103775		9792	SERTAD2	-0.835016	0.000824449
9249	DHRS3	-0.938179	2.87124e-06		65258	MPPE1	-0.918746	9.12932e-06		26262	TSPAN17	-0.836832	0.000955562
NA	AF385432	-0.9465	0.00192068		3099	HK2	-0.918764	0.0016604		1163	CKS1B	-0.837454	0.00843871
90231	KIAA2013	-0.946872	2.54679e-05		3484	IGFBP1	-0.921774	0.00059837		150465	TTL	-0.837724	0.00720013
51669	TMEM66	-0.948845	0.000115991		3017	HIST1H2BD	-0.922522	0.0066459		359948	IRF2BP2	-0.839219	0.000341037
9267	CYTH1	-0.948909	0.00131098		10505	SEMA4F	-0.923703	0.00391971		2938	GSTA1	-0.840391	1.13893e-05
23204	ARL6IP1	-0.95041	0.00311048		9232	PTTG1	-0.928032	0.000616032		8318	CDC45	-0.841465	6.59588e-06
2261	FGFR3	-0.961711	0.00456405		4048	LTA4H	-0.938877	0.00029804		51303	FKBP11	-0.842586	0.000851647
1601	DAB2	-0.965968	0.000234194		58516	FAM60A	-0.943196	0.00255318		130576	LYPD6B	-0.842809	0.000489838
1609	DGKQ	-0.969109	0.000187955		59343	SENP2	-0.943584	8.9427e-05		8870	IER3	-0.843554	0.00443641
7088	TLE1	-0.970116	0.0098725		9182	RASSF9	-0.944218	0.000357537		493812	HCG11	-0.843561	6.38364e-06
80255	SLC35F5	-0.971171	0.00242486		10252	SPRY1	-0.948643	0.00611834		5649	RELN	-0.844176	0.000173627
5147	PDE6D	-0.972583	0.000101771		858	CAV2	-0.952265	0.00293469		4832	NME3	-0.846577	0.00107005
64327	LMBR1	-0.982467	0.000222887		5887	RAD23B	-0.957887	1.48976e-05		8848	TSC22D1	-0.846713	0.00478172
9182	RASSF9	-0.991704	0.000266		51669	TMEM66	-0.958214	7.79901e-05		27324	TOX3	-0.846735	0.00408135
133	ADM	-0.992556	0.000120262		7088	TLE1	-0.962625	0.00805028		64395	GMCL1	-0.847624	0.00241247
3099	HK2	-0.996566	0.000964417		8843	GPR109B	-0.971551	0.000126842		552900	BOLA2	-0.847867	1.04046e-05
3017	HIST1H2BD	-0.997603	0.00432703		133	ADM	-0.974079	0.000113249		56255	TMX4	-0.850201	0.000131098
8445	DYRK2	-0.998686	0.0029696		26262	TSPAN17	-0.974088	0.000123947		2584	GALK1	-0.850419	8.00477e-06
30061	SLC40A1	-1.00278	0.000538131		30061	SLC40A1	-0.976067	0.000553331		115123	March3	-0.851535	0.00546491
138151	NACC2	-1.00344	2.79174e-06		10137	CPNE1	-0.977582	0.000291049		57817	HAMP	-0.852484	3.79591e-08
4048	LTA4H	-1.00456	0.000179261		1647	GADD45A	-0.978496	0.000296712		10537	UBD	-0.852662	0.00360789
10505	SEMA4F	-1.01067	0.00219556		5147	PDE6D	-0.980741	6.78775e-05		7855	FZD5	-0.855348	0.000118656
5594	MAPK1	-1.01709	0.000228516		9249	DHRS3	-0.984047	1.13281e-06		2592	GALT	-0.860126	0.000188173
59343	SENP2	-1.02424	0.000429236		115123	March3	-0.988594	0.000410266		4072	EPCAM	-0.861404	0.00286384
7259	DSE	-1.02499	1.81974e-05		10161	LPAR6	-0.994587	6.35884e-05		57016	AKR1B10	-0.863523	3.79591e-08
221079	ARL5B	-1.02574	1.16086e-07		23677	SH3BP4	-0.997327	0.000276345		55500	ETNK1	-0.864397	7.36263e-08
94241	TP53INP1	-1.03046	0.000249066		90231	KIAA2013	-1.00342	9.08057e-06		9969	MED13	-0.866118	0.00482191
59343	SENP2	-1.03078	4.02118e-05		84962	JUB	-1.00556	6.20731e-05		29925	GMPPB	-0.867888	0.000813178
4790	NFKB1	-1.03096	0.000782302		3964	LGALS8	-1.00925	0.000507883		196483	FAM86A	-0.868134	0.000561957
90427	BMF	-1.04085	0.000115991		23457	ABCB9	-1.01207	0.000114057		7538	ZFP36	-0.869098	0.000193076
124491	TMEM170A	-1.04121	4.02118e-05		9232	PTTG1	-1.01372	0.000119142		6201	RPS7	-0.870451	6.02504e-06
26234	FBXL5	-1.0423	0.000907709		124491	TMEM170A	-1.0214	3.77428e-05		5629	PROX1	-0.870539	1.32699e-06
84962	JUB	-1.04959	4.8194e-05		79960	PHF17	-1.02267	0.000178341		3484	IGFBP1	-0.871285	0.00011958
9846	GAB2	-1.0506	2.10945e-05		201164	PLD6	-1.02302	0.00246213		3898	LAD1	-0.872633	2.19588e-05
5887	RAD23B	-1.05154	5.90847e-06		26234	FBXL5	-1.02996	0.000763085		6386	SDCBP	-0.873187	0.00547218
51111	SUV420H1	-1.05381	2.67012e-07		10381	TUBB3	-1.0317	0.000223045		93664	CADPS2	-0.875174	0.000990625
85441	PRIC285	-1.05834	5.63653e-05		7855	FZD5	-1.03414	0.00201355		22822	PHLDA1	-0.877901	5.67782e-08
26262	TSPAN17	-1.05932	6.23388e-05		10672	GNA13	-1.03973	5.77012e-05		140465	MYL6B	-0.878248	0.0019218
10137	CPNE1	-1.0602	0.000150805		94241	TP53INP1	-1.04149	0.000165889		26873	OPLAH	-0.878844	1.19582e-05
6446	SGK1	-1.06126	0.00782289		26255	PTTG3	-1.04325	0.000158433		27242	TNFRSF21	-0.879591	0.000204296
9232	PTTG1	-1.06144	9.40469e-05		51111	SUV420H1	-1.05063	3.14126e-07		4048	LTA4H	-0.882653	6.60867e-05
1453	CSNK1D	-1.0632	9.40469e-05		8555	CDC14B	-1.05157	3.35511e-07		55603	FAM46A	-0.882815	1.75923e-06
1525	CXADR	-1.06747	3.09189e-05		8424	BBOX1	-1.05394	9.08057e-06		2938	GSTA1	-0.884927	1.63647e-05
85236	HIST1H2BK	-1.07616	0.00334335		3093	UBE2K	-1.06174	0.000665874		27018	NGFRAP1	-0.885106	0.00343379
652	BMP4	-1.07813	3.22244e-05		10468	FST	-1.06191	0.00361032		5595	MAPK3	-0.885819	0.00108597
23677	SH3BP4	-1.08803	0.000136506		23204	ARL6IP1	-1.06479	0.000744409		51523	CXXC5	-0.885828	0.00958726
8848	TSC22D1	-1.09866	0.00954172		135112	NCOA7	-1.06776	0.000820411		3170	FOXA2	-0.886007	0.00550395
50650	ARHGEF3	-1.10138	0.0044258		85441	PRIC285	-1.06974	3.6304e-05		10955	SERINC3	-0.886072	0.000248163
221833	SP8	-1.10557	0.00691805		221079	ARL5B	-1.09035	4.05003e-08		8545	CGGBP1	-0.886346	9.28849e-05
3964	LGALS8	-1.10643	0.00023752		152007	GLIPR2	-1.09046	0.0037178		NA	GTF2IP1	-0.889449	0.000173627
3093	UBE2K	-1.10729	0.000538759		4942	OAT	-1.10206	0.00401508		5734	PTGER4	-0.890174	0.00727201
6431	SRSF6	-1.11441	0.0102104		55504	TNFRSF19	-1.1071	6.60364e-05		4015	LOX	-0.891813	0.000143804
84265	POLR3GL	-1.11602	4.24908e-06		NA	CPNE1	-1.10855	0.000489458		728939	PDZK1	-0.892353	8.7473e-05
151613	TTC14	-1.11774	0.000345848		80255	SLC35F5	-1.11733	0.000410266		4172	MCM3	-0.894086	1.46919e-05
26255	PTTG3	-1.11795	9.73527e-05		9334	B4GALT5	-1.12672	0.00611834		4609	MYC	-0.894522	5.79489e-06
8555	CDC14B	-1.11983	1.4215e-07		94241	TP53INP1	-1.12907	0.000335584		9846	GAB2	-0.894933	0.000130301
65258	MPPE1	-1.1236	9.27583e-07		1525	CXADR	-1.13423	9.88665e-06		8365	HIST1H4H	-0.89688	2.559e-06
29094	HSPC159	-1.13667	0.000218953		344838	PAQR9	-1.13778	0.00724525		8848	TSC22D1	-0.899594	9.93401e-06
NA	LOC100129186	-1.14271	6.42577e-05		285761	DCBLD1	-1.1421	0.00975001		23625	FAM89B	-0.900981	0.00408135
80139	ZNF703	-1.14758	4.02118e-05		55603	FAM46A	-1.14522	0.000654642		126382	NR2C2AP	-0.903377	0.00103605
7855	FZD5	-1.15058	0.000909879		678	ZFP36L2	-1.1471	0.0104833		26355	FAM162A	-0.903812	0.000625594
151613	TTC14	-1.16775	0.000501769		79862	ZNF669	-1.1521	0.0014727		1890	TYMP	-0.90608	2.98806e-05
23568	ARL2BP	-1.17671	4.77479e-06		54206	ERRFI1	-1.15976	0.00636367		9232	PTTG1	-0.906602	6.37956e-05
90427	BMF	-1.1812	0.000186413		8445	DYRK2	-1.16435	0.000447505		4489	MT1A	-0.90801	3.28156e-08
10468	FST	-1.18678	0.00162543		8870	IER3	-1.16898	0.00798015		2984	GUCY2C	-0.908584	1.1439e-05
10608	MXD4	-1.18847	0.000686431		195827	C9orf21	-1.17427	0.00166601		7048	TGFBR2	-0.90899	0.00396496
726	CAPN5	-1.19223	0.000394931		493812	HCG11	-1.18025	1.89559e-05		2920	CXCL2	-0.913861	7.4137e-06
8835	SOCS2	-1.20001	0.00166145		10608	MXD4	-1.18525	0.000531404		NA	HIST2H2AA4	-0.915083	2.52602e-05
493812	HCG11	-1.21306	1.7804e-05		7050	TGIF1	-1.20038	0.00544244		5976	UPF1	-0.920687	0.00898044
51092	SIDT2	-1.22149	0.00424932		9589	WTAP	-1.20449	0.00029804		634	CEACAM1	-0.924103	5.79489e-06
8654	PDE5A	-1.22218	5.07998e-08		58516	FAM60A	-1.2061	0.00223555		3151	HMGN2	-0.924875	0.00144831
115123	March3	-1.22366	2.37812e-05		83641	FAM107B	-1.22048	0.000119545		55159	RFWD3	-0.925828	0.00113772
94241	TP53INP1	-1.23091	0.000163467		122786	FRMD6	-1.24148	0.000157752		3306	HSPA2	-0.926571	0.00266533
8424	BBOX1	-1.2385	1.28981e-06		55339	WDR33	-1.24213	2.31684e-05		5376	PMP22	-0.929398	0.000813178
7538	ZFP36	-1.24111	0.00259132		151613	TTC14	-1.25667	0.000165712		135114	HINT3	-0.929489	0.000284851
152007	GLIPR2	-1.2422	0.00139835		7357	UGCG	-1.259	0.00210022		762	CA4	-0.929805	4.98797e-06
23457	ABCB9	-1.24295	1.27479e-05		115123	March3	-1.26002	1.1424e-05		9419	CRIPT	-0.932474	0.00148668
195827	C9orf21	-1.24855	0.00121234		57132	CHMP1B	-1.26119	7.23361e-06		5831	PYCR1	-0.933166	1.8878e-05
57132	CHMP1B	-1.25817	9.47679e-06		3017	HIST1H2BD	-1.26299	0.00104955		3267	AGFG1	-0.933167	0.000432047
201164	PLD6	-1.26922	0.000332207		85236	HIST1H2BK	-1.26725	0.000466643		NA	AK055561	-0.934118	1.01815e-07
55603	FAM46A	-1.27027	0.000260388		51619	UBE2D4	-1.27958	0.00102078		55920	RCC2	-0.936029	0.000736226
23095	KIF1B	-1.27193	0.00143607		151613	TTC14	-1.28572	5.31035e-05		5053	PAH	-0.939431	0.00322561
1848	DUSP6	-1.27471	0.006617		27242	TNFRSF21	-1.29671	1.60451e-05		84858	ZNF503	-0.945194	0.00294747
2872	MKNK2	-1.27634	0.000217007		55281	TMEM140	-1.30058	9.40749e-06		6288	SAA1	-0.945611	0.00917196
678	ZFP36L2	-1.27674	0.00549455		2920	CXCL2	-1.30177	5.10779e-05		653238	GTF2H2B	-0.952308	0.00263847
56892	C8orf4	-1.28246	0.00242524		23645	PPP1R15A	-1.30189	2.15687e-05		7033	TFF3	-0.955028	0.000431928
2920	CXCL2	-1.3035	6.52212e-05		23568	ARL2BP	-1.3091	8.57246e-07		3075	CFH	-0.955972	0.00155365
8334	HIST1H2AC	-1.30392	0.00151154		10252	SPRY1	-1.31359	0.00203646		998	CDC42	-0.956831	0.000320533
10252	SPRY1	-1.30822	0.00286551		7538	ZFP36	-1.32578	0.000995204		8780	RIOK3	-0.959905	0.00390793
3017	HIST1H2BD	-1.32374	0.000867037		56892	C8orf4	-1.32591	0.00130384		79077	DCTPP1	-0.960028	0.000815286
2296	FOXC1	-1.32762	0.00492542		2861	GPR37	-1.33651	1.29562e-05		26061	HACL1	-0.960319	0.0013938
51619	UBE2D4	-1.33549	0.000877483		55500	ETNK1	-1.33891	0.000151976		2618	GART	-0.961498	0.00698221
338758	LOC338758	-1.34115	0.00307959		2872	MKNK2	-1.34109	9.2789e-05		3958	LGALS3	-0.962807	1.53579e-06
10672	GNA13	-1.35383	0.000418284		338758	LOC338758	-1.34306	0.00227041		55215	FANCI	-0.968898	0.00102425
344838	PAQR9	-1.37731	0.00158845		8848	TSC22D1	-1.35526	0.00101101		6197	RPS6KA3	-0.970816	0.000320627
375061	FAM89A	-1.38749	4.02118e-05		NA	AK055561	-1.36761	1.19452e-06		4174	MCM5	-0.970962	0.000143867
23645	PPP1R15A	-1.39397	1.27479e-05		8835	SOCS2	-1.37553	0.000290291		23582	CCNDBP1	-0.971569	0.000414883
10221	TRIB1	-1.43681	0.003446		1847	DUSP5	-1.37947	0.00211647		650	BMP2	-0.975341	0.00193427
NA	TLE4	-1.43862	1.16086e-07		2150	F2RL1	-1.38843	9.08057e-06		NA	BOLA2B	-0.975784	0.000865127
55500	ETNK1	-1.44735	8.34252e-05		375061	FAM89A	-1.41471	2.31684e-05		8976	WASL	-0.9758	0.0057209
27242	TNFRSF21	-1.45148	5.08053e-06		10137	CPNE1	-1.42433	9.12932e-06		7779	SLC30A1	-0.976265	6.97208e-07
55339	WDR33	-1.45554	3.90664e-06		25976	TIPARP	-1.46858	0.00926027		NA	CSRP2BP	-0.978331	0.000492625
2861	GPR37	-1.45774	5.68325e-06		1958	EGR1	-1.48873	9.43712e-05		5947	RBP1	-0.980856	0.000211675
1316	KLF6	-1.46035	0.00340003		1316	KLF6	-1.49278	0.00207729		2746	GLUD1	-0.988599	0.00144774
3491	CYR61	-1.50544	0.00866738		375061	FAM89A	-1.49431	5.7979e-05		7072	TIA1	-0.988933	0.00654745
375061	FAM89A	-1.52203	6.04193e-05		4609	MYC	-1.4948	0.000201797		94274	PPP1R14A	-0.989958	8.15226e-06
55281	TMEM140	-1.55858	1.28931e-06		10672	GNA13	-1.52359	8.46357e-05		23192	ATG4B	-1.00084	0.000154378
4609	MYC	-1.58546	0.000138164		NA	TLE4	-1.602	2.36496e-08		994	CDC25B	-1.00887	0.00913891
10137	CPNE1	-1.598	2.70464e-06		1848	DUSP6	-1.61651	0.000469127		5471	PPAT	-1.01469	0.00891812
1847	DUSP5	-1.60229	0.000586395		6431	SRSF6	-1.63698	0.000158433		402	ARL2	-1.01818	0.000435406
7779	SLC30A1	-1.62788	3.22244e-05		2353	FOS	-1.65035	8.57246e-07		23204	ARL6IP1	-1.01913	2.54648e-05
375061	FAM89A	-1.63384	7.78791e-06		7779	SLC30A1	-1.65244	1.92386e-05		10162	LPCAT3	-1.01917	6.28643e-05
2150	F2RL1	-1.65406	1.28931e-06		8334	HIST1H2AC	-1.68968	6.35884e-05		10381	TUBB3	-1.02272	0.000667099
1316	KLF6	-1.66582	0.00191724		3491	CYR61	-1.6964	0.00224782		2919	CXCL1	-1.02301	0.00219828
7057	THBS1	-1.69072	0.000349744		1848	DUSP6	-1.70339	5.7979e-05		8435	SOAT2	-1.02729	0.000419547
NA	AK055561	-1.73815	7.5533e-08		1316	KLF6	-1.70796	0.00112581		57418	WDR18	-1.02841	0.000613307
1958	EGR1	-1.754	1.71229e-05		375061	FAM89A	-1.77201	1.93556e-06		57706	DENND1A	-1.03196	0.00102425
6430	SRSF5	-1.79433	3.15772e-06		1843	DUSP1	-1.77826	1.14873e-05		NA	APOC4-APOC2	-1.03629	0.00949471
4609	MYC	-1.80395	0.000538759		4609	MYC	-1.78217	0.000469127		10221	TRIB1	-1.03904	8.87159e-05
2353	FOS	-1.81697	2.39986e-07		6430	SRSF5	-1.79019	2.57489e-06		30833	NT5C	-1.04344	0.000187275
1843	DUSP1	-1.8192	1.27479e-05		7057	THBS1	-1.80709	0.000123947		3017	HIST1H2BD	-1.04517	1.64264e-06
7779	SLC30A1	-1.86175	7.09257e-06		7779	SLC30A1	-1.85986	6.10044e-06		10252	SPRY1	-1.05034	0.000128577
6430	SRSF5	-1.91694	2.25153e-07		6430	SRSF5	-1.89982	3.00551e-07		400027	LOC400027	-1.06183	5.65944e-05
1848	DUSP6	-1.94336	1.51757e-05		4494	MT1F	-1.92245	0.006655		140809	SRXN1	-1.06299	0.00357556
4494	MT1F	-2.05025	0.00492128		55500	ETNK1	-1.93162	2.28837e-07		10672	GNA13	-1.06302	1.69943e-05
1543	CYP1A1	-2.08543	0.00186217		1906	EDN1	-1.98156	1.05337e-05		115123	March3	-1.06373	4.81089e-05
1906	EDN1	-2.13232	5.4728e-06		1543	CYP1A1	-2.05812	0.00158883		5885	RAD21	-1.06446	4.53415e-05
4496	MT1H	-2.17486	0.00635099		NA	MT1JP	-2.14824	0.000562195		59343	SENP2	-1.0666	0.000165154
55500	ETNK1	-2.27349	2.74248e-08		3576	IL8	-2.24964	0.00503751		81689	ISCA1	-1.07528	0.00500389
NA	MT1JP	-2.45374	0.000163467		9518	GDF15	-2.3538	0.000945625		90231	KIAA2013	-1.07782	1.1439e-05
4502	MT2A	-2.57345	0.000327067		22822	PHLDA1	-2.44316	2.16707e-05		23457	ABCB9	-1.0808	0.0013005
22822	PHLDA1	-2.59047	1.44771e-05		4502	MT2A	-2.49158	0.000359103		57132	CHMP1B	-1.08257	2.91591e-06
9518	GDF15	-2.64092	0.000349006		4495	MT1G	-2.83143	0.00262369		8805	TRIM24	-1.08722	0.000134572
4489	MT1A	-3.09514	9.34355e-05		4489	MT1A	-2.92967	0.000126388		84171	LOXL4	-1.09059	0.000120316
4495	MT1G	-3.47938	0.000397647		4493	MT1E	-3.63578	7.32371e-06		9782	MATR3	-1.09185	0.00017275
4501	MT1X	-3.72653	1.54482e-05		4501	MT1X	-3.79267	9.08057e-06		23160	WDR43	-1.10753	0.00366138
4493	MT1E	-3.79847	5.19414e-06							586	BCAT1	-1.12167	8.69992e-05
										7259	DSE	-1.12398	6.09503e-05
										2932	GSK3B	-1.13141	0.000107305
										3294	HSD17B2	-1.13206	9.28849e-05
										55920	RCC2	-1.13306	0.00965826
										316	AOX1	-1.13716	8.38055e-06
										11322	TMC6	-1.13966	0.00248136
										255738	PCSK9	-1.1398	2.88953e-05
										2542	SLC37A4	-1.1412	1.13268e-05
										NA	GRIA3	-1.14866	2.559e-06
										91703	ACY3	-1.15097	0.00293593
										10468	FST	-1.15263	9.4698e-05
										857	CAV1	-1.16055	0.000179712
										51316	PLAC8	-1.1677	4.20686e-07
										124491	TMEM170A	-1.16813	8.77531e-05
										441282	AKR1B15	-1.17428	4.87685e-07
										51659	GINS2	-1.17839	0.000107305
										7032	TFF2	-1.18064	1.05352e-06
										285761	DCBLD1	-1.18135	0.000131098
										216	ALDH1A1	-1.18433	4.84557e-05
										152189	CMTM8	-1.19702	0.00740004
										1465	CSRP1	-1.19983	0.00271477
										64395	GMCL1	-1.20429	0.000596969
										645676	LOC645676	-1.2204	0.00130565
										8445	DYRK2	-1.22072	2.98559e-05
										112936	VPS26B	-1.22846	0.00016096
										7357	UGCG	-1.23186	6.97336e-06
										1958	EGR1	-1.23194	3.42738e-07
										7570	ZNF22	-1.23625	0.00808211
										10608	MXD4	-1.23766	0.000140723
										NA	TLE4	-1.23795	2.90037e-06
										9182	RASSF9	-1.24945	0.0082763
										55773	TBC1D23	-1.2504	6.09503e-05
										79862	ZNF669	-1.25195	5.68806e-05
										55859	BEX1	-1.25636	4.87934e-06
										1052	CEBPD	-1.2576	0.00163279
										26234	FBXL5	-1.27281	0.000155875
										5328	PLAU	-1.27353	4.95636e-05
										3964	LGALS8	-1.28381	0.000473636
										4494	MT1F	-1.2927	1.01815e-07
										55304	SPTLC3	-1.29465	0.000303117
										30061	SLC40A1	-1.2953	0.0004279
										388272	C16orf87	-1.32998	0.0019218
										2560	GABRB1	-1.33043	0.000247547
										9530	BAG4	-1.3328	0.00167466
										100133941	DQ893812	-1.33393	0.000154055
										1361	CPB2	-1.34025	3.24102e-06
										4171	MCM2	-1.34892	6.09503e-05
										11182	SLC2A6	-1.35827	0.000818557
										113655	MFSD3	-1.36103	0.00078574
										9774	BCLAF1	-1.36187	0.00109012
										6906	SERPINA7	-1.36475	2.559e-06
										NA	LOC645513	-1.36926	1.96494e-05
										10763	NES	-1.39035	1.85099e-05
										5699	PSMB10	-1.39518	1.44544e-05
										10947	AP3M2	-1.40563	0.00144987
										64853	AIDA	-1.41394	5.08732e-05
										27077	B9D1	-1.41591	0.00346855
										94241	TP53INP1	-1.43177	0.00097713
										130814	PQLC3	-1.43576	0.000217862
										7104	TM4SF4	-1.43692	5.68769e-05
										677800	SNORA12	-1.44068	2.21499e-05
										1027	CDKN1B	-1.4512	0.00045742
										26190	FBXW2	-1.47288	0.000492625
										27329	ANGPTL3	-1.47693	6.03051e-05
										1361	CPB2	-1.47744	5.75552e-07
										8334	HIST1H2AC	-1.47972	3.42738e-07
										4499	MT1M	-1.49975	1.05352e-06
										4502	MT2A	-1.50338	3.79591e-08
										4609	MYC	-1.5302	2.91283e-07
										10551	AGR2	-1.55738	9.69031e-08
										1525	CXADR	-1.56478	1.1439e-05
										55294	FBXW7	-1.60476	1.13268e-05
										445	ASS1	-1.60667	6.97208e-07
										1545	CYP1B1	-1.64483	1.76986e-07
										1848	DUSP6	-1.67296	5.39722e-07
										282969	C10orf125	-1.68025	1.05352e-06
										1647	GADD45A	-1.69674	0.000240488
										4496	MT1H	-1.7743	4.31211e-07
										1848	DUSP6	-1.97365	1.53579e-06
										23231	SEL1L3	-2.36945	0.000173627
										29957	SLC25A24	-2.60509	0.0033696
										6430	SRSF5	-2.60899	1.01815e-07
